# Supplementary material
Source: MDPI journal article supplement (https://www.mdpi.com/search?q=buildings-07-00104)
Supplement: s001 [file buildings-07-00104-s001.zip]

## Sheet: Startups
Basic Company Information										Detailed company information						Business Type			Tracks												Industries
Company Name	Type	Website	Country	City	Founding Year	Industry	Stage	Short description	Company description	Founders & Team	Product description	Market	Competition	Growth (the last 12 mo)	Growth (the next 18 mo)	B2B	B2C	B2G	Clean technology	Big data, analytics & cloud	Ecommerce & Payments	Education technology	Entertainment & Media	Future enterprises & software	Gaming & VR	Health, Medtech & Wellbeing	Impact business & Developing markets	New technology showcase	Product design	Startup Academy	Analytics, big data & AI	Biotechnology	Bitcoin & cryptocurrencies	Cleantech	Communications & media	Consumer electronics	Cyber security	E-commerce & online marketplaces	Education	Energy	Enterprise software	Financial & payment services	Food & nutrition	Gaming	Health & wellbeing	Industrial internet & IoT	Manufacturing tech & materials	Med tech & pharma	Mobile
ECLANT Co., Ltd	Early Stage	http://www.ecolant.com	Korea, Republic of	INCHEON	2013	Industrial internet & IoT Energy	Concept only	Smart Lighting application & technology service for companies and government.	- Consult Lighting business development and improvement - Provide Environmental lighting solution for municipalitis and guide creative CPTED through IoT lighting - Develop and relalize new ICT & Lighting convergence technology anf Make LED lighting business synergy with IT and communication industry	Founder : Youngho Baik - has 20 years experience in Lighting indusrty. A large part of his career with Philips lighting and a long track-record of marketing & strategy and IoT lighting solution R&D Team : Heygeun Lee - is in charge of design and data analysis in smart lighting applications.	Smart & Portable solar LED street lighting with beneifts of quick & easy installation and adaptive on-demand lighting based on presence detection with much longer life time, no maintenance required, appropriate but lowest cost for the developing country which has critical electric power shortage.	Due to widespread energy poverty in many developing counries, still billions people in darkness and in dangers of street, residential and remote area safety at night. Hope this solution care people to enjoy brightness equalilty at night. Main addressable market is the country has enough sunpower.	Main competitor is "bipolarization in energy industry" and "Incognizance of energy discrimination". Thanks to long experience in lighting industry, our company sure that Light is very important asset for all people on the earth whatever rich or poor. We look forward to see more companies like us.	For many months, we have really looked for cutting edge or revolutionary soluton but for optimum solution to provide light at night for people who needed. Now we think that we are growing more on people caring in stead of technology development.	We plan to visit developing countries and meet people in there. We should know more about "reality of night life, what they need and how we can do better for them". Of course, we will do our utmost efforts for better quality and better price. We'd like to communicate with international organzations	No	No	Yes	Yes	Yes	No	No	No	No	No	No	No	No	No	No	No	No	No	No	No	No	No	No	No	Yes	No	No	No	No	No	Yes	No	No	No
Blooming	Early Stage	http://blooming.io/eng	Finland	Helsinki	2015	Industrial internet & IoT Health & wellbeing	Concept only	Blooming is on a mission to become a IoT and data-driven health care provider	Our vision to become the #1 IoT and data-driven health care provider in the World. We start from people living with hypertension. There are 500.000.000 people whose blood pressure is out of control. Blooming is a personalized service that helps people control hypertension at home.	Kristian Ranta, ex-founder & CEO at Mendor Riku Lindholm, ex-employee at Mendor & author of the Path to Product/Market Fit Juhana Nurmio, ex-employee at Mendor & Head of Investor and Startup operations at Slush Goran Bjelajac, ex-employee at Mendor & winner of the Red Dot design award	Blooming is a personalized service that helps people control hypertension at home.	Around 1 trillion dollars. Health care is going to become almost completely digital in the future. We plan to be among the first companies providing clinical diagnostics using IoT-enabled devices and real-time analytics by health care professionals.	Competitors: Withings, Hello Heart App, Tensio, health care providers. We have a unique and extensive background in clinical diagnostics & health care.	Founded in September? 2015	Customer development & launch late 2015 early 2016. Most important thing for us is to get the product/service of the ground.	Yes	Yes	No	No	Yes	No	No	No	No	No	Yes	No	No	No	No	No	No	No	No	No	No	No	No	No	No	No	No	No	No	Yes	Yes	No	No	No
Suomi Puku	Early Stage	http://www.suomipuku.fi	Finland	Alajärvi	1990	Health & wellbeing Wearable technology	Concept only	Work on demand - work in minutes with the Work App - Uber type service for jobs	Work on demand is Uber type service for jobs like cleaning and handyman services	Markus Hanhisalo	Uber type of platform and application for providing cleaning and handyman services. Easy way to find workers to do small jobs. This platform is also targeting asylum seekers to find work.	Global market. Similar market as Uber has.	Workforce companies.	NA	Create the platform to start providing this new service. First pilot this in Helsinki, Finland.	No	Yes	No	No	No	Yes	No	No	No	No	Yes	No	No	No	Yes	No	No	No	No	No	No	No	No	No	No	No	No	No	No	Yes	No	No	No	No
Hoiva Technologies OY	Early Stage	http://meikkamaija.wix.com/hoivatechnologies	Finland	Espoo	2015	Health & wellbeing Social entrepreneurship & Impact	Concept only	We provide solutions for easy living to elderly and the challenged	Product description:Create a social hub for the following groups:Over 65 and able bodied and/or challenged (Physically, Mentally, visually, etc)Other groups interested in supporting and getting support from the target group (eg, schools, Immigrants, service providers)	Jennifer Kutvonen Founder. IT: Tech support, Project management and Sales and Account ManagementKey member Kiarii Ngua: UX/UI designer	The social hub would act as an avenue or forum for these groups to continue developing themselves by arranging and providing activities suited to individuals within the target groups.The difference from existing solutions is that the target groups are in charge of the hubs activities	Service providers within the B2G and B2B categories may propose and sell ideas/services and technologies to the Target groups. This services should all be aimed at "easy living" and support the goals and needs of the groups.	So far none, but individual service providers act independently.1. Cities/counties provide limited leisure or social activities2. NGOs providing some activities (sports clubs)3. Technology providers selling gadgets through their own channels	We are only starting so none yet	Our strategy is that when we have built the platform, service providers pay to have their products marketed within the platform.The target group, may be requested to be used used as user experience test group for upcoming easy living technologies and services.	Yes	Yes	Yes	No	No	No	No	No	No	No	Yes	Yes	No	No	Yes	No	No	No	No	No	No	No	No	No	No	No	No	No	No	Yes	No	No	No	No
Innsystec	Early Stage	http://www.innsystec.com/	Germany	Aachen	2015	Mobile	Concept only	Energy efficient transmitter technology for wireless base stations	Innsystec has developed a transmitter technology that leads to a significant decrease in energy consumption in wireless base stations. The strongly growing global demand of mobile broadband services will lead to substantial growth in total energy consumption. We are targeting OEMs like Nokia.	We are a founding team of 3 engineers (Ahmed, Anh, Junqing) and 1 business guy (Ralf). The 3 engineers have developed the technology in the last 4 years at the universities and have filed the patents. The business guy has started several companies on his own and advised other hightech entrepreneurs.	Our technology, once developed, will be integrated into the radio unit of wireless base stations. The way of implementation in the radio unit is unique, patented and different to the state of the art and will lead to substantial performance improvements.	We address a $6bn global market of radio units in small and macro base stations. It is still growing as data transmission demand will still increase over the next couple of years. In order to enter the market it is important to win a big player as a partner.	There is a small number of infrastructure OEMs that are having their own radio unit. It is the strategy to create a pull effect through the network operators and additionally to partner with one OEM for the market entry.	The technology has been developed to a state where it is now ready to be tested in a real market environment. So far the current product demonstrator shows excellent results compared to the state of the art technology. The company will be founded in summer 2015.	We are expecting to have the product ready which can be integrated into base stations by Q1 2016, even with greater performance than today's product demonstrator. Revenues of >$100m are expected in 2020.	Yes	No	No	Yes	No	No	No	No	No	No	No	No	Yes	No	Yes	No	No	No	No	No	No	No	No	No	No	No	No	No	No	No	No	No	No	Yes
None	Normal	http://www.flipkart.com	India	Mumbai	2015	Bitcoin & cryptocurrencies	Concept only	None	asdnaosdnaso	sjdoasdoasjdo	aosdjasjdoas	asdsadasd	asdasdsa	asdasdas	jdnkdsfd	Yes	No	No	No	No	No	No	No	No	No	No	No	No	No	No	No	No	Yes	No	No	No	No	No	No	No	No	No	No	No	No	No	No	No	No
000	Normal	http://ifdd.com	Russian Federation	Moscow	2013	Cleantech	Concept only	000000	00000	-00000	0000	0000	0000	0000	000	Yes	Yes	No	No	No	No	No	No	No	No	No	No	No	No	No	No	No	No	Yes	No	No	No	No	No	No	No	No	No	No	No	No	No	No	No
DTECH NET SOLUTION COMPANY	Normal	http://dtechnetsolution.wordpress.com	Tanzania, United Republic of	Dar es salaam	2015	Communications & media	Concept only	Working with youth in design and implementation of technology ensures	work with schools in difference application	Daniel Mkale	Software and systems	Schools Companys	non	non	non	Yes	No	No	No	No	Yes	Yes	No	No	No	No	No	Yes	No	No	No	No	No	No	Yes	No	No	No	No	No	No	No	No	No	No	No	No	No	No
ConferRoom	Early Stage	http://conferroom.com	Russian Federation	St.Petersburg	2015	E-commerce & online marketplaces	Concept only	Online booking services	Online booking services for business and custommers	Slava Mukhin	Online booking services for business and custommers	-	-	-	-	Yes	Yes	Yes	No	Yes	Yes	No	No	No	No	No	No	No	No	Yes	No	No	No	No	No	No	No	Yes	No	No	No	No	No	No	No	No	No	No	No
Fincon	Normal	http://fincon.rs	Serbia	Belgrade	2012	Social entrepreneurship & Impact	Concept only	Internationalization consulting for Finnish companies in Balkan market	We help Finnish companies to penetrate Balkan market and to establish business in the market. Wide range of services from market research to EU funding application support.	Founder, Igor Madzarevic, ex-Finpro consultant and expert of Balkan market. Partner, Mikko Savusalo, Eastern Europe Finnish business pioneer	Internationalization service in Balkan area combining local Balkan market expertise and knowledge of Finnish business needs	All Finnish / Nordic companies looking to expand in Balkan area. Huge potential for cleantech, biomass, technical services.	No apple-to-apple competition	Not public information	Not public information	No	Yes	No	Yes	No	No	No	No	No	No	Yes	No	No	No	No	No	No	No	No	No	No	No	No	No	No	No	No	No	No	No	No	No	No	No
Etco	Early Stage	http://www.etco.fi	Finland	Helsinki	2015	E-commerce & online marketplaces Mobile	Concept only	We won't save the world but we'll make it a better and happier place to live	Etco is developing barometer, an online price comparison and drink list presentation site for bars. It will help users to choose their venue and bar owners to fill their bars.	Joel Jaakkola, a lawyer turned into a disruptor. https://www.linkedin.com/in/joeljaakkola	Barometer allows users to browse the drink menus and the drink prices of the bars before deciding where to go. It can also show promotional happy hour and drag-in prices to attract customers, which is prohibited in many countries. And yes, we make it legal.	Outgoing price and/or brand sensitive students, hipsters and other bar aficionados in virtually all cities in virtually all countries.	N/A	The service is still under development	We anticipate a wide userbase in 3 months following the initial launch. But unlike Leonard Cohen, first we take the Nordics then we take Manhattan	No	Yes	No	No	No	Yes	No	Yes	No	No	No	No	Yes	No	No	No	No	No	No	No	No	No	Yes	No	No	No	No	No	No	No	No	No	No	Yes
J & P	Early Stage	http://None.none	Finland	Helsinki	2015	E-commerce & online marketplaces	Concept only	Not yet a company. We are a core team of 2, with an additional helper.	Our team have many years experience in private and public sector, James as a Customer purchasing services, Pekka as a Supplier selling services. We have combined our experience to come up with an idea that could revolutionize the way that intellectual services are traded.	James, founder - many years experience in IT, especially in contract and project management. Pekka, associate - many years experience in IT, business solutions & process design.	Online platform orchestrates the end to end process of service demand/supply: customer wants solution, finds service supplier, follows up to ensure the service delivery provides the solution, and finally pays & rates the supplier. We've found a solution to guarantee the customer will be satisfied.	I believe this concept can apply to most intellectual services. There is no geographic boundary, and the concept can be franchised.	Competition are the agencies that sell CV's (consultants paid by the hour) to customers. Our concept will disrupt this market place.	None. We are at the ideas phase.	We are at the ideas phase. No future projections so far.	Yes	No	No	No	No	Yes	No	No	Yes	No	No	No	No	No	Yes	No	No	No	No	No	No	No	Yes	No	No	No	No	No	No	No	No	No	No	No
Klovy	Early Stage	http://www.klovy.com	Estonia	Tallinn	2013	Mobile Social media	Concept only	Map your favorite places, share them, raise awareness, build loyalty.	Klovy wants to be the mobile gateway for consumers to interact with local places. Klovy customers get rewarded with points redeemable for vouchers, to spend at their favorite places or at new places they wish to discover. Lower customer acquisition costs, long-term loyalty.	Xavier, CEO. IT Engineer, SAP specialist. Joao, COO. Runs an online media agency.	Bookmark your favorite places on maps. Share these maps with others. Get inspired by other maps. Users get informed about news and specials through thematic feeds. They easily engage with these places on- and off-site to earn points and vouchers to reward their engagement.	Local businesses, chains or independent.	Google Maps, Groupon, Mapstr, Foursquare and the likes.	None. We are starting from scratch after trying to develop mobile solutions for the hospitality industry.	Concept validation by Q2 2016. Prototype by Q3 2016. Test with limited partners by Q4 2016.	Yes	Yes	No	No	No	Yes	No	No	No	No	No	No	No	Yes	Yes	No	No	No	No	No	No	No	No	No	No	No	No	No	No	No	No	No	No	Yes
Unitech	Early Stage	http://www.tmexpress.cn	Finland	Helsinki	2015	E-commerce & online marketplaces	Concept only	License universities' patents to technology users in Chinese market	The company is still in planing. The idea is that universities have created a great number of patents, but they rarely exploit these patented technologies by themselves. The company will collect university patents to license them to customers in Chinese market.	Liguo Zhang, a Chinese lawyer, has been studying and working in intellectual property law in Europe (Germany and Finland) for 10 years. He has investigated many issues with respect to licensing intellectual property and finds great potential in doing business in licensing intellectual property.	First we collect unused valid patents from universities, then we find potential users in China. We will license these patented technology to implementors. We will share the royalty with patent owners.	At the beginning, we will focus on Chinese market. On one hand, the demand for technologies in China is growing, on the other hand, many foreign universities are unable to exploit their technology in Chinese market. There could be a wast of resource. There is great potential in Chinese market.	Intellectual ventures and other technology licensing companies, open innovation companies. We are familiar with both Chinese and European environments.	we are going to start.	We are still investigating the opportunity	Yes	No	No	Yes	No	No	No	No	No	No	Yes	No	Yes	No	No	No	No	No	No	No	No	No	Yes	No	No	No	No	No	No	No	No	No	No	No
Toothselfie.com	Early Stage	http://toothselfie.com	Finland	Helsinki	2015	Health & wellbeing	Concept only	Toothselfie eradicates all cavities from people's teeth by better oral hygiene	Toothselfie eradicates all cavities from people's teeth by creating better oral hygiene habits. The solution simply forces people to brush their teeth well by requiring a photograph of well brushed teeth to be fed into the system every morning and evening for 3 months.	Currently this is a concept being developed by Anssi Mikola, a serial entrepreneur	Toothselfie eradicates all cavities from people's teeth by creating better oral hygiene habits. The solution simply forces people to brush their teeth well by requiring a photograph of well brushed teeth to be fed into the system every morning and evening for 3 months.	The market is all people with a smart phone. The assumption is that the product is used once or twice in a persons lifetime. With smartphone penetration above 60 % in developed countries the addressable market would be over 2 billion people.	Competition is currently the education delivered by schools and dental practices around the world. This is predominantly a very expensive way of delivering education as each instance of education requires a personal visit.	We are in process of finding a pilot site. Ne deployment has been made so far.	The first pilots should be out by the end of the year, after which the intention is to distribute through viral distribution and school health education curriculums.	No	Yes	No	No	No	No	Yes	Yes	No	No	Yes	No	No	No	No	No	No	No	No	No	No	No	No	No	No	No	No	No	No	Yes	No	No	No	No
Palscan	Early Stage	http://www.palscan.com	Finland	Helsinki	2015	Social media	Concept only	Palscan extends your social networks by matching the future.	Palscan extends your social networks by matching the future. Connect with like-minded, team-up and discover new worlds together!	Co-founders, very experienced team.	Palscan extends your social network by matching your future with others.	Pilot made for European markets, but soon after globally through strategic partnerships.	Our advantage is unique angle of future activity and new social networks. Market leader social services and travel agencies as competition.	Demo (POC) phase now, beta in the beginning of 2016.	Detailed material on this by request.	Yes	Yes	No	No	No	No	No	Yes	Yes	No	No	No	No	No	Yes	No	No	No	No	No	No	No	No	No	No	No	No	No	No	No	No	No	No	No
Fifth Sense Studios	Early Stage	http://fifth-sense.com	India	Mumbai	2015	Gaming	Concept only	Games with a Social Message...	We are in the process of starting a Mobile Gaming Company that will focus on the development and publishing of mobile games (ios & android platforms) which will carry a ‘social message’ and create social awareness among the users towards the cause being promoted.	Vivek Burman - FounderDeepak Naidu - Chief Operating Officer	- Games with a Social Message- Sound Promotion & Marketing Strategy- Social Causes close to people's hearts- India-Centric Content- Easy Globalisation of Content- Interesting and Fun Games focussing on Casual Gamers	- Focus on India- 200+ Mn Smart Phone Users- With a YoY growth of 132.2%, revenues in India’s mobile gaming market have grown faster than any other BRIC country.- Indian mobile gaming market to grow to US 570+ Mn in 2016 (CAGR 134.6%)- ARPU expected to rise to US 2.75, up 315% from 2013	Our company will be the one of the first gaming companies in India to not create or publish games that do not promote a ‘social initiative’. However, we are not a ’non-profit’ company, and believe that revenues and profits are by-products of quality games, backed by a sound marketing & promotion.	Still in concept stage.	To achieve 10 Mn downloads for our games	No	Yes	No	No	No	No	No	No	Yes	Yes	No	No	No	No	Yes	No	No	No	No	No	No	No	No	No	No	No	No	No	Yes	No	No	No	No	No
Meetender Oy	Early Stage	http://www.meetender.fi	Finland	Helsinki	2015	Enterprise software	Concept only	Meetender visualises and optimises enterprise decision making flows	Meetender is developing a solution to visualise and optimise enterprise decision making, communication and information flows to cut down unncessary meetings, to streamline business process flows and to manage organisational changes. Target audience is enterprises over 100 persons.	Founder: Jukka Jokiranta, entrepreneur since 2006. Owner and founder of consulting company focusing on sales marketing development for CPG in Finland, Baltics and Russia for over 10 years. Other team members cannot be named at this point (not working 100% for Meetender yet)	Meetender is developing a solution to visualise and optimise enterprise decision making, communication and information flows. Key differentiating feature is to use 3D visualisation, mapping and advanced optimisation techniques in organisational planning and management to pinpoint bottlenecks.	Global	Competitors are 'classic' consulting companies providing process consulting. Competitive advantage comes from totally different, analytical and visual perspective to organisational effectiveness.	Concept only	Concept only	Yes	No	No	No	Yes	No	No	No	Yes	No	No	No	No	No	No	No	No	No	No	No	No	No	No	No	No	Yes	No	No	No	No	No	No	No	No
Safety Plan Concept	Early Stage	http://safetyplanconcept.com	Finland	Helsinki	2014	Mobile	Concept only	SPC mobilize companies safety and critical messages and reports 24/7	SPC create PEAK safety app. It is designed to keep companies safety level high 24/7. It’s packed with features for both everyday safety and real emergencies, making it the ultimate safety tool for your company. PEAK puts safety in YOUR and COMPANYs hand!	Partners: Teemu Leppälä, Ville Komonen, Aino Laakso, Jouni Kohonen, Niclas Broman and Mikko Ahlholm	PEAK is a company safety app designed to keep you and company safer 24/7. It’s packed with features for both everyday safety and real emergencies, making it the ultimate safety tool for you and everyone on your company. Messenger, near miss, non conformance and emergency situations.	The aim of marketing is to know and understand the customer so well the product or service ?ts him and sells itself B2B.” Safety for B2B market is key element. When you consider your product to be part of your dynamic strategy marketing plan. PEAK app gets everything messages on high level.	PEAK app collect messenger and company safety tasks under one place. Really time and all companys employees. SPC team and partners have high level safety professional and also serial enrepreneur.	Now we have been make research from the market and markets are really interested our PEAK solution. Now our demo2 is finished and we are soon proceeding to piloting PAEK app with some potential company.	Main thing is to make PEAK app ready to App Store. We need 4months to create photo ready for piloting. Piloting is 6months and then we are ready to B2B market. After 18 months there have been 10 companies load PEAK app from App store. Media start to be interested and markets are open.	Yes	No	No	No	No	No	No	No	No	No	No	No	Yes	No	No	No	No	No	No	No	No	No	No	No	No	No	No	No	No	No	No	No	No	Yes
Zalupka	Normal	http://zalupka.com	Kazakhstan	Alamata	2015	Biotechnology	Concept only	zalupka lupka lupka	zalupka lupka lupka	zalupka lupka lupka	zalupka lupka lupka	http://zalupka.com	http://zalupka.com	http://zalupka.com	http://zalupka.com	Yes	No	No	No	No	No	No	No	No	No	No	Yes	No	No	No	No	Yes	No	No	No	No	No	No	No	No	No	No	No	No	No	No	No	No	No
Liukas Lintu	Early Stage	http://www.liukaslintu.net	Finland	helsinki	2015	Food & nutrition Education	Concept only	Honest honey and original beekeeping products. One beehive for every garden.	Liukas Lintu brings new innovative beekeeping products to the global market. Honeycomb and bee bread are produced in innovative packaging. Liukas Lintu helps novice beekeepers enter the trade by offering education and affordable and sustainable beekeeping kits for urban environments.	Founder: Kristina Björknäs, beekeeper, gardener and engineer. Kristina has a solid academic background including a PhD in Engineering Science and >15 years of global business experience (R&D, product development, sourcing, and marketing) at Nokia and Microsoft.	The honeybees produce honeycomb directly onto special cardboard plates. When harvested the cardboard is transferred into wooden boxes made from birch. Liukas Lintu also commercializes bee bread in birch packaging. Beekeeping education without the need for expensive extraction equipment is on offer.	Honeycomb is honey in its most natural form but due to modern extraction methods people have become alienated from it. Honey and honey comb consumption can be doubled in Finland and in the world. Liukas Lintu aims to train 100 beekeepers in the first two years.	No other Company produces honeycomb and beebread in birch boxes. I'm also not aware of another Company that offers online beekeeping education.	Liukas Lintu is a new startup.	Liukas Lintu will develop at least three new beekeeping products and will employ 5 people in the first year.	No	Yes	No	Yes	No	No	No	No	No	No	No	No	No	Yes	Yes	No	No	No	No	No	No	No	No	Yes	No	No	No	Yes	No	No	No	No	No	No
GameHub - eSports	Early Stage	http://gamehub.fi	Finland	Jyväskylä	2015	Gaming Music & entertainment	Concept only	Building local electronic sports leagues nationally and globally.	We are developing a internet platform for organising leagues and pick-up-games on local to global levels. We are also organising the offline tournaments which start from small local non-byoc tournaments to national tournaments and from there to global tournaments. We will also provide eSports TV.	Ilkka Hartikainen - JAMK UNIVERSITY OF APPLIED SCIENCES - Tiimiakatemia entrepreneurship development Henteri Hallamaa - JAMK - Tiimiakatemia entrepreneurship development Elias Nygrén - B.Sc. International Business / B.Sc. Computer Science / several years of experience in full stack development	eSorts leagues are not focused on smaller eSport activities and dont provide much content with importance for players.	Our market will be first at Finland but right after we get our product to run in here we are looking for growing opportunities to other Nordic countries	Biggest European companies, like ESL (Turtle Entertainment) and faceit.com and individuals lan-parties	We are gathering followers to social media, right now we have 150 people following.	We are growing our reach to cover 1,5 million people in our network in year 2016.	Yes	Yes	No	No	Yes	No	No	Yes	No	Yes	No	No	No	No	No	No	No	No	No	No	No	No	No	No	No	No	No	No	Yes	No	No	No	No	No
dsga	Normal	http://sdafdas.com	American Samoa	dsgadsg	2015	E-commerce & online marketplaces	Concept only	dsgasdg as gasg as	d lkjasghlkd ahgkewjf hkejfh aweølk	das gkjds hgkja hfklejw her	dsag kjdsfah lkwejf hwlkej hrlkj	dsahds gasf asg asd sd	da sgdsg dsa gads ga	d agsdg asd ga	dasg dsag sdg asdg a	No	No	Yes	No	No	No	No	No	No	No	No	No	No	No	No	No	No	No	No	No	No	No	Yes	No	No	No	No	No	No	No	No	No	No	No
Biocaching	Early Stage	http://biocaching.com	Norway	Oslo	2015	Gaming Social entrepreneurship & Impact	Concept only	Biocaching is a gaming app that inspires people to learn about nature	We are developing a game base on observing and taking pictures of species in nature. Users of the game will learn about species and their habitats and can be used by people of all ages, and also in schools and other organized groups. All data collected will be forwarded to research via GBIF.org.	Bjørn Hjelle, IT-consultant, software developer, Acando Norway, Oslo Norway Alice Polenghi, freelance designer, Tromsø, Norway Davide Rapotez, designer and student, Tromsø, Norway Peter Bremer, Software Developer, Husbanken, Trondheim, Norway Albin Larsson, Software Developer, Student, Sweeden	Our product is an app to be used for citizen science to crowdsource research data. It will be developed as a game and will be great fun for people of all ages to use. When playing the game you learn about species and nature, and you can contribute to science at the same time.	In 2014 the global market for gaming on smart phones was 800 million people. We will target the national (Norwegian) market first, but eventually all people with smart phones will be potential users.	Existing, similar apps and webpages like iNaturalist, Project Noah, Questa Game. We will offer a richer gaming experience, and will also work with partners in each country to develop a more userfriendly app. (with priority on local species, etc)	We started in June 2015, and are still working on the concept, but has been recognized by the Eye on Earth Alliance and will attend their 2015 Summit in Abu Dhabi 6-8th oct as one of the finalists in the citizen science challenge.	We want to develop a fully functional prototype and after that seek funding for a full implementation.	No	Yes	No	No	Yes	No	No	No	No	Yes	No	Yes	No	No	No	No	No	No	No	No	No	No	No	No	No	No	No	No	Yes	No	No	No	No	No
Simcase	Early Stage	http://simcase.ru/en/index.html	Russian Federation	Ulyanovsk	2014	Analytics, big data & AI E-commerce & online marketplaces	Concept only	SimCase provides Big Data solutions for online services and e-commerce.	We provide solutions for user's behaviour analytics for increasing conversion, sales and client's loyalty: recommendations systems, RFM analytics and probabilistic evaluation system of marketing strategies.	Kirill Svyatov ­ - founder, Oleg Silakov ­- CMO, Dmitry Davidov - ­ CTO.	Complete solution to increase sales by implementing marketing strategies based on the analysis of user behaviour, their prediction, and close integration with e­commerce solutions.	E­commerce solutions: Ecwid, Magento and Shopify. Big companies: Sodexo, Orange and etc. Game companies: Ximad and etc.	Competitors: Windsor Circle, Bronto. Our advantages: integration with popular e­commerce solutions, focus on the middle segment, ease of deployment and pricing.	1) Entering the market Ecwid. 2) Trial version ­ the growth of customers from 0 to 200 users in a single month. 3) Partnership with Ecwid. 4) Creating solutions for the gaming company Ximad	1) launch the market advisory system and RFM analytics 2) grow up to 1,000 Ecwid customers 3) Creating adapters to Magento and Shopify 4) Search for large customers	Yes	Yes	No	No	Yes	Yes	No	No	No	No	No	Yes	No	No	No	Yes	No	No	No	No	No	No	Yes	No	No	No	No	No	No	No	No	No	No	No
Hoge .Inc	Normal	http://hogeinc.com	Japan	Fukushima	2015	Analytics, big data & AI	Concept only	aaaaaaaaaaaaaaaaaaa	aaaaaaaaaaaaaaaaaaaaaaaaaaaa	Me	Weed	City market	John	aaaaaaa	bbbbbb	No	Yes	No	Yes	No	No	No	No	No	No	No	No	No	No	No	Yes	No	No	No	No	No	No	No	No	No	No	No	No	No	No	No	No	No	No
Slush	Normal	http://slush.org	Finland	Helsinki	2015	Enterprise software E-commerce & online marketplaces	Concept only	Admin test	Admin test	Admin	Admin	Admin	Admin	Admin	Admin	Yes	No	No	No	No	No	No	No	No	No	No	No	Yes	No	No	No	No	No	No	No	No	No	Yes	No	No	Yes	No	No	No	No	No	No	No	No
Koutu Digital Solutions G	Normal	https://www.facebook.com/koutudigital	Finland	Espoo	2015	Wearable technology Industrial internet & IoT	Concept only	Koutu Digital is a Start-up company specialized in dream up.	We make things a true. Today goal is to create an app for selecting the right size clothes. This should be done by using a mobile camera or a portable devices (IOS, Android, Windows) and image-processing solution to turn the picture(s) into clothing measures and sizes.	Toni Koutu, Owner and Business Architect, Digitalist. Rest of a team members are Demola multidisciplinary team solving real-life cases together with Koutudigital Ideas and innovations	Online Fitting Room. The goal of the project is to create an app for selecting clothes. This should be done by using a mobile camera or a portable devices (IOS, Android, Windows) and image-processing solution to turn the picture(s) into clothing measures and sizes.This eliminates the error of choice	I believe that app will be finds its way into the consumer devices. Online shops find that the returns will be reduced drastically	This is Apps. The fastest to win for himself a consumers.	The growth arises from how the online stores are able to meet the consumer's request to provide a service.	The growth arises from the way we respond to customer demands. For this we need a good team.	Yes	Yes	No	Yes	No	No	No	No	Yes	No	Yes	No	No	No	No	No	No	No	No	No	No	No	No	No	No	No	No	No	No	No	Yes	No	No	No
GiftApp	Normal	http://giftapp.org	Finland	Godby	2009	Social entrepreneurship & Impact	Concept only	GiftApp allows people to give gifts - in the form of donations - to one another.	The Gift App allows people to give gifts to one another. The gifts are donations to charities. Gifts are sent as private messages or publicly posted to a social network. The GiftApp brand is owned and developed – since 2014 – by Axventure AB incorporated in Finland in 2009.	Jonas Holmström, Founder & CEO Axventure AB, currently webmaster at Visit ÅlandMarcus Forsberg, CTO, web designer & developerTanja Sabel, board member Axventure AB, Airport Manager Mariehamn at Finavia, President Zonta Club Mariehamn?Axventure AB is a registered LLC and GiftApp is the brand.	The Gift App allows people to give gifts to one another. The gifts are donations to charities because people have enough crap already. Gifts are sent as private messages or publicly posted to a social network. Uses notifications & reminders to encourage giving. Enables automatic recurring giving.	GiftApp targets gift giving for which we have no numbers. However it is huge. The untested hypothesis is that the niche for gifts given as donations to charities is large enough to be worthy of pursuit. No charity or organization currently offers an app or service that addresses this market.	Competition consist of charities promoting a) their gifts to givers; b) their gifts to recipients; c) several charities to the recipient (e.g. waiving your birthday presents, asking givers to donate to a charity instead). No direct competition in multiple charities/causes targeted at gift givers.	The business idea has been developed during weekends only. The work with the GiftApp business plan and technical specifications is ongoing. Contacts have been made with a few charities and with people within the Effective Altruism movement.	The goal is to validate the idea and launch a MVP as well as form partnerships with key charities.	No	Yes	No	No	No	No	No	No	No	No	No	Yes	No	No	Yes	No	No	No	No	No	No	No	No	No	No	No	No	No	No	No	No	No	No	No
ChoCho	Normal	http://googl.com	Afghanistan	Oih	2015	Gaming	Concept only	Only game	Only game	Only me	Only like game	gov.	other companies	no growth	no sorry	No	No	Yes	No	No	No	No	No	No	No	No	No	No	No	No	No	No	No	No	No	No	No	No	No	No	No	No	No	Yes	No	No	No	No	No
Enthusias	Early Stage	http://www.enthusias.com	Finland	Helsinki	2015	Social media Social entrepreneurship & Impact	Concept only	ETHUSIAS is an online platform for the local foodie to find their gourmet.	ETHUSIAS will to gather small groups or couples together to meet, converse, dine together. Learn and appreciate different culture through food. In the end, the customer can decide how much they would like to pay for the whole service.	Yuexin DU, Creative Sustainability, Design master student in Aalto Univeristy	The underlying magic of ENTHUSIAS is that it will create a joyful experience for both the hosts and the guests. The target of ENTHUSIAS is not about business, it is about sharing, sharing love, sharing culture and sharing happiness, to let people understand each other and trust each other.	ENHUSIAS will mostly focus on the young people who are enthusiast to conserve the world, to learn different culture, and also for those young people who would like to get some income in their free time.	EATWITH ,COOKENING, NAGOMI VISIT. In ENTHUSIAS ,the uers can decide how much they would like to pay for the whole service, that make the service more open, and brings new oportunity in the market.	ENHUSIAS now is still at the concept stage, it has registered the domain ENHUSIAS.COM, but it has not been registered as a company yet. And it still looking for the team members.	First design MVP and test out if the ENTHUSIAS concept would really work; launch the real website at about the 8th month,testing and promoting ; cooperating with other social media, restaurants, and companies. later start to promote it globlely.	No	Yes	No	No	No	No	No	No	Yes	No	No	Yes	No	No	Yes	No	No	No	No	No	No	No	No	No	No	No	No	No	No	No	No	No	No	No
FCI Dogs	Early Stage	http://fcidogs.com/	Latvia	Riga	2015	Communications & media	Concept only	IT system witch helps 40 000 000 dog owners in every day life.	The business idea is to create the information system for purebred dogs called FCI Dogs. Our goal is to ensure system’ availability to all dog owners, keepers, breeders, clubs and national representatives in all 90 member and partner countries of the International Federation of Cynology (FCI).	Davis Vilcans. Co-founder. 10 years experience in marketing, advertising and design Dita Lapsa. Co-founder. 5 years experience in IT systems. FCI dog breeder.	Our system will help dog owners participate to FCI shows. Show organizers this platform will help to work with data.	Our market area consists of 91 member and partner countries of the FCI.	There are no sutch system in world.	One year ago we have only a idea. Right now we just launched our first beta version and we already have paying customers.	In next 18 months, our goal are to be in all europ countries and	Yes	Yes	No	No	No	No	No	Yes	No	No	No	No	No	Yes	Yes	No	No	No	No	Yes	No	No	No	No	No	No	No	No	No	No	No	No	No	No
IndustrySim Ltd.	Early Stage	http://www.industrysim.com	Finland	Turku	2013	Education Cleantech	Concept only	IndustrySim Ltd. is developing a new gamified Virtual Platform for B2B customers	IndustrySim Ltd. is a team of professionals with backgrounds in process industries, information technology and game development.	CEO, Mr. Tomas Rosin, serial entrepreneur, expertise in industrial automation and measurement Ville Vuorela, experienced game designer. Bartosz Bien, software architect with 15+ years_x000B_ of experience, primarily in game and simulation development Marek Znamirowski, C++ expert Mr. Marek Znamirowski	The product, IndustrySim Virtual Platform is a highly gamified simulation of different industrial processes. There are useful applications in Engineering(e.g testing new concepts). In marketing & sales, IndustrySim Virtual Platform enables the third wave of digitalization.	The geographical market is global and fairly strongly growing since the potential clients must all the time develop themselves to stay on the competitive edge.	The biggest competition comes from the obsolete software tools which are currently in use.	Product still under development	Product still under development	Yes	Yes	No	Yes	No	No	Yes	No	No	No	No	No	No	No	No	No	No	No	Yes	No	No	No	No	Yes	No	No	No	No	No	No	No	No	No	No
Auntie Finland	Early Stage	http://feelgreat.fi	Finland	Helsinki	2015	Health & wellbeing	Concept only	Mobile game/service to enhance relationships	We are developing a mobile application to help people to be better and more comfortable in their close relationships, eg with their spouses and children. The service is based on strong theory and extensive data base. The development team includes wide variety of different, experienced experts.	Mervi Lamminen, CEO, experience in mobile application in wellbeing, Experienced psycologist, bringing in expertise and content, plus the network in that specific area"Storyteller", experienced journalist and expert in writing textsMarketing expertMobile developers	The essence of the service is the content. In first phase service will be available in Finnish and English. First version is B2C, in Q3/16 a B2B -service will be launched as well. Our service will help the customer to have better attitude towards their relationships and life in general.	First phase market (with pilot use) is Finland. Soon (Q1/16) the service is available also in English, and the main market will be USA. Based on theory, approximately 40 % would benefit of developing their behavior towards others. However, from marketing point of view we will target smaller groups.	Our competitive advantage comes from the strong content and the "game - like" appearance, that makes it tempting to use the service.	We are creating the concept.	Getting the team together, making the shareholder agreements, creating the concept and the content.	Yes	Yes	No	No	No	No	No	No	No	No	Yes	No	No	Yes	Yes	No	No	No	No	No	No	No	No	No	No	No	No	No	No	Yes	No	No	No	No
Cuppla	Early Stage	http://www.cupplatech.com	Finland	Helsinki	2015	Education Mobile	Concept only	Mobile Device and Content Management for Educational institutes and SMBs	Solution to manage digital devices in educational institutes and SMBs. Mobile Devices are more and more integral part in daily education. Currently devices are unmanaged and content cannot be distributed and managed easily. We offer tools to fully support and utilize BYOD and cross device usage.	We are a team of six with more than 50 years of experience in development and concept MDM in co-operation with leading DM vendors. Including service management, application distribution and Business intelligence. Previously in Nokia and lately in Microsoft with global responsibility.	With our light and efficient DM solution, educational institutes can secure their devices and they can easily distribute content to student, track their participation and progress. We support BYOD and cross device usage efficiently and therefore fewer device investments are needed.	All MDM vendors are currently targeting large enterprises. We are targeting to all educational institutes from preschool to university level. Our solution can easily also support SMBs needs. We offer an end to end solution together with product implementation training and support.	We have strong and long background in MDM and our experts can concept an end to end solution that can bring value add cost savings. Our DM solution will introduce new cutting edge solutions to the usage and utilization of non-managed devices in the education field.	Our company is in concept phase and it has not yet been fully started, we are currently looking for partners.	Our plan is to start our business and development. After running a pilot with a few customers we are planning to penetrate to the markets. Our goal is to focus on Education institutes and SMBs.	Yes	No	Yes	No	No	No	Yes	No	Yes	No	Yes	No	No	No	No	No	No	No	No	No	No	No	No	Yes	No	No	No	No	No	No	No	No	No	Yes
PeptiCrad	Early Stage	http://ivtlab.org	Finland	Helsinki	2015	Health & wellbeing Biotechnology	Concept only	PeptiCRAd is a biopharmaceutical company developing immunotherapy for cancer	PeptiCRAd is a soon-to-be founded biopharmaceutical company that carries out research, development and commercialization of novel therapy for various cancers. The company will be a spin-out from the University of Helsinki and it develops its products based on its proprietary platform.	Founding researcher is Associate Professor Vincenzo Cerullo from the University of Helsinki. Discussions on the management team are on going.	We have developed a novel approach to treat cancer, based on attaching pieces of tumor on the surface of a common virus platform. Using this approach, we have been able to completely eradicate human tumors in animal models.	Our approach is a platform technology suitable for treatment of various cancers. However, proof-of-concept has been achieved in melanoma . The melanoma market was valued at $1.34 Bn in 2013, and expected to reach $5.64 Bn in 2023 with a CAGR of 15,5%.	Checkpoint inhibitors and peptides vaccine. For full success rates, these therapies would require active immunotherapy, such as PeptiCRAd, which combines the well-documented safety of conventional oncolytic viruses with the specificity peptide-based approaches.	The technology is based on an invention born at the University of Helsinki. We currently have Tekes funding to develop the technology closer to the market and to explore the best commercialization routes.	We are going to establish a spin-out company based on our technology platform. We are currently negotiating with a possible management team and are seeking investments and co-development possibilities to advance the technology towards first-in-man studies.	No	Yes	No	No	No	No	No	No	No	No	Yes	No	Yes	No	No	No	Yes	No	No	No	No	No	No	No	No	No	No	No	No	Yes	No	No	No	No
Business Spy	Early Stage	http://jklyritystehdas.fi/fi/asiakastarinat/vapaus-ja-vastuu-innostavat-yrittamaan/	Finland	Ilmajoki	2015	Analytics, big data & AI	Concept only	Business Spy reveals true faces of companies and helps to make right choices.	Consumers have troubles trusting companies, e.g. case VW emission scandal. Our solution is simple, scalable and unbiased plugin for internet browsers. Business Spy is a community driven tool that solves the problem of conscious consumers worrying about the effects of their choices.	Anu Kuivaniemi, 25 year-old serial entrepreneur, teampreneur and founder of Business Spy. Winner of a national idea competition in July 2015. Markus Mäntynen, project leader & startup coach in Jyväskylä Innovation and Business Factory, 15 years of expertise from e-commerce.	Our solution is simple, scalable and unbiased plugin for internet browsers. Business Spy is a community driven tool that solves the problem of conscious consumers worrying about the effects of their choices. Detailed description our innovation is secret sauce. Please meet us in Slush to hear more.	Business Spy is a disruptive innovation for 7 Trillion B to B to C market. Our service empowers consumers to compare companies based on unbiased ethical values. In addition, Business Spy provides real time consumer metrics for businesses in order to discover real time KPIs.	There are lots of old fashioned consumer reviewing Web 2.0 solutions like Trip Advisor and Skyscanner about products and prices but nothing for reviewing ethical values and company practices. Our solution will disrupt all current solutions by providing state-of-the art plugin for internet browsers.	Business Spy got started in 2015 and won a national idea competition by Inspired In Finland in July. Many pitches and evaluations have been done and juries consisted of board members like Nokia Tyres COB Petteri Walldén and many experts from some of the biggest companies in Finland.	Currently we are raising 250k$ funding in order to execute and scale up FAST. Business Spy will be the world’s leading business analytics house offering real time decision making information for both large consumer masses and companies.	Yes	No	No	No	Yes	No	No	No	Yes	No	No	Yes	No	No	No	Yes	No	No	No	No	No	No	No	No	No	No	No	No	No	No	No	No	No	No
The Crowd Property Group	Early Stage	http://www.cpg.es	Spain	Valencia	2015	E-commerce & online marketplaces Financial & payment services	Concept only	To become a leader in the Spanish property management with using of Crowdfunding	Access to the Spanish property market in a New Era of Financing. The company will be prosperous because the application of Crowdfunding provides access to property in easy investment process for achieving a high level of diversification and minimizing risk.	Evgeny Bunin has financial experience in some international start-ups RRT Global Inc., IDNG Ltd. Andrew Treacy has huge skills in international trade	Crowdfunding platform	Alternative finance	Housers.es, Crowd Estates, InvesReal	Registration of the company - January 2016 Completion of the platform - March 2016 Conclusion of market testing - April 20 First property deal - May 2016	Spain - Headquarters, 2016 Italy - Marketing, sales, 2018 France - Marketing, sales, 2019	Yes	Yes	No	No	No	Yes	No	No	No	No	No	No	No	No	No	No	No	No	No	No	No	No	Yes	No	No	No	Yes	No	No	No	No	No	No	No
Kinasera	Normal	http://kinasera.com	Estonia	Tartu	2015	Biotechnology Med tech & pharma	Concept only	We are developing a novel biomarker-based assay for prostate cancer detection	We are developing a novel biomarker-based non-invasive assay of prostate cancer detection based on quantitative profiling of protein kinase activity	Prof. Asko Uri, Founder, CSO - has been design bioactive compounds since 1991. Sven Parkel, PhD, CEO - background in science, studying for MBA, also works as a tech transfer officer. Raiko Uri, Founder, Business advisor - has worked as an investment and fund manager and business advisor	A novel biomarker-based non-invasive assay of prostate cancer detection based on quantitative profiling of protein kinases in circulating exosomes.	Prostate cancer screening and diagnostics market was worth over 12 billion USD in 2012 and continues to rise. Currently used PSA test gives 70% false positive results leading to unnecessary biopsies.	Several companies develop prostate cancer tests. We have the most promising technology.	We have hired two new workers and continue to develop the test.	We are looking for grant funding and investments to continue test development during that period	Yes	No	No	No	No	No	No	No	No	No	Yes	No	Yes	No	Yes	No	Yes	No	No	No	No	No	No	No	No	No	No	No	No	No	No	No	Yes	No
StripYourBanker	Early Stage	http://www.stripyourbanker.com	United Kingdom	London	2015	E-commerce & online marketplaces Financial & payment services	Concept only	First open-architecture, independent and transparent investment market place	Millions know they need to do something with their savings but too many choices kill the choice, making the selection process arduous hence deterring. We seek to solve this by bringing the first "family office" platform to the masses, replicating on-line ultra rich people's tools to select managers	Jean-Bernard Tanqueray (F), Wealth Manager 17 years’ experience in wealth management, LBSYves Coignard (B), COO, Asset Manager & Quant Researcher, 20 years’ experienceLuke Riordan, Developper (UK) - 17 years’ experience in financial software development	Sole, full open architecture Investment market place where -> Consumers have the whole markets transparently screened to be suggested the most appropriate products best fitting in their financial goals-> Asset managers can directly & cost-efficiently interact with consumers and be rated by them	The financially aware consumers not feeling literate or confident enough to go DIY or trust the first one. In the UK, we are taking about 4 million households with an average financial wealth north of 200K GBP on top of average pension savings of more than 700K GBP thus totalling 8tn GBP of assets	We are not investment manager but a self-selectiona market place. As such, our closest competitor is dashboard.de although focused on Germany. Our closest substitute is Nutmeg. However, this company positioning itself as an investment manager, it is more than welcome to join our platform	Customer discovery and prototype building kept us very busy. Our first client is a continental entity for whom we provided investment research via our concierge MVP.	Now it is time to grow into alpha stage and conquer the lower end of private investors with assets superior to 1 million GBP. This will enable us to "trickle down" as to serve the wider mass affluent segment	Yes	Yes	No	No	Yes	No	No	No	No	No	No	No	No	Yes	Yes	No	No	No	No	No	No	No	Yes	No	No	No	Yes	No	No	No	No	No	No	No
Crowst	Early Stage	http://crowst.com	Finland	Helsinki	2015	E-commerce & online marketplaces Mobile	Concept only	Gather field data for companies using crowdsourcing	Every modern day shopper carries a smartphone. We are developing a mobile service that will earn the shoppers rewards or discounts through their smartphones, each time they visit a store, by simply responding to a few surveys. These surveys will in return provide crowd intelligence to Brands.	Richard Jerome - CEO. 15 years experience in digital technology industry, with 7 years in mobile industry. Most recently led the distribution channel development in my previous company, focused on strategy and analytics of key sales channels. Skilled in business and sales development	The service will change the way companies gather field data, providing them with wider location coverage, near real time reporting and much cheaper. It also allows the flexibility for companies to gather a multitude of different types of data.	The total market intelligence market is 40Bn$ globally. Field data gathering is integral to market intelligence. However, the opportunity expands to much more than market intelligence only.	Market research agencies (Nielsen, Kantar, etc.) - very expensive with limited services for data gathering Consulting companies (BCG, Bain, etc.) - very expensive, but data gathering is not core Other crowdsourced solutions (FieldAgent, Roamler, etc.) - economical, but limited to retail	Still in conceptual / design phase	Launch the product and build channel partnership to gain early traction in Retail, with subsequent expansion to other verticals	Yes	No	No	No	Yes	No	No	No	Yes	No	No	Yes	No	No	No	No	No	No	No	No	No	No	Yes	No	No	No	No	No	No	No	No	No	No	Yes
Redwerk	Normal	http://redwerk.com/	Ukraine	Kiev	2005	E-commerce & online marketplaces Mobile	Concept only	It's just software. Anything is possible.	Redwerk helps established businesses of all sizes create software products by delivering unparalleled talent, dedication, and value to provide a seamless and smooth outsourcing experience to customers.	Konstantin Klyagin - CEO of a software development company	Uadjet is an online video surveillance solution for web and mobile with advanced notification capabilities	Private households and businesses.	canary.is evercam.io	Early stage, not yet launched.	Hope to launch.	No	Yes	No	No	No	Yes	No	Yes	Yes	No	No	No	No	No	No	No	No	No	No	No	No	No	Yes	No	No	No	No	No	No	No	No	No	No	Yes
iMatrics AB	Early Stage	http://www.imatrics.com	Sweden	Linköping	2015	Communications & media Analytics, big data & AI	Concept only	We develop tools for large scale textual analysis and information extraction.	We develop RankPosts: a tool for analysis and information extraction from discussion forum data. RankPosts enables users and businesses to efficiently navigate through large amounts of text data. Our product is targeted towards discussion forum owners.	Berkant Savas, founder and CEO. PhD in scientific computing, research background in computational algorithms for large scale graph and network problems. Simon Jare, co-founder. MSc in media technology, frontend and backend software development.	Our analysis tool RankPosts enables discussion forum users to efficiently navigate through and extract relevant information from long threads. RankPosts increases the user experience and generates higher traffic to forum sites. Consequently, RankPosts increases the revenue for forum owners.	Our addressable market consists of internet discussion forums. There are millions discussion forum sites with potential user base in billions, i.e. internet users that generate and consume information content at forums.	Possible competitors are information technology and business intelligence companies, e.g., Google, Amazon.com, Yahoo, Microsoft, IBM and more.	iMatrics was founded in February 2015. Since June 2015 iMatrics is a member of LEAD in Linköping, one of Swedens leading business incubators. We are about to finish the verification phase in LEADs incubator program.	Our goal for the next 18 months is to provide our services to a number of customers that generate sufficient revenue for us to build a solid technological framework so that we can deploy our tools to worldwide markets.	Yes	Yes	No	No	Yes	No	No	Yes	No	No	No	No	No	No	No	Yes	No	No	No	Yes	No	No	No	No	No	No	No	No	No	No	No	No	No	No
To be founded "ADDC"	Impact	http://www.addc.fi	Finland	Espoo	2015	Social entrepreneurship & Impact	Concept only	Fund raising for the third sector	The company aims to create tools and services to bring the third sector organizations, general public and entreprises together. The aim is to generate new sources of funding for the third sectors through entreprises' corporate social responsibility initiatives with the general public's involvement.	Lasse Musakka, start-up, software development, globalisation, general management in large corporations Ying Zhu, start-up, legal consultation, globalisation Other members with experience of the relevant fields.	Mobile applications as well as consulting services	The third sectors are chronically under-funded and the tools for them to raise fund is limited. The situation is made worse with well-being society losing its capability to maintain the level of social wellness. There is enormous need for creative ways to create and raise fund.	The area is not very well developed. So competition is less an issue than creating the market, because the way we plan to do it requires attitude changes in the third sector orgnaizations, the business world as well as the general public to certain extend.	0	We plan to become the leading fund raiser for the third sector organizations in Finland in the next 18 months. We hope we will become global leader in the field in future.	No	Yes	No	No	No	No	No	No	No	No	No	Yes	No	No	No	No	No	No	No	No	No	No	No	No	No	No	No	No	No	No	No	No	No	No
ReserveEat	Early Stage	https://ninjamock.com/s/N3N4T	Cyprus	Nicosia	2015	E-commerce & online marketplaces Food & nutrition	Concept only	Online restaurant reservation platform with integrated CRM & Reserv Manag tools	Innovative and informative mobile app that adds value to both restaurant clients and owners by providing a user-friendly, reliable and absolutely free way of making a table reservation to restaurants all over Cyprus, while also complemented by a website, offers a reserv manag tool to restaurateurs.	Alexios Stefanidis - Financial Controller: Economics, Banking, MBA Ilke Ozerlat - Marketing and Customer Relationships: Law, MBA, Coffee Production & Promotion Ioulia Saraki - Customer Service: Turkology, MBA Loizos Karageorgiades - IT Specialist: Software engineer, MBA, Networks (Cisco & Oracle)	Eliminates the communication gap between diners and restaurateurs. For diners: helps to discover new restaurant choices based on past reviews and make instant reservations, 24/7. For restaurateurs: helps to increase operational efficiency and revenue through its integrated web-based CRM tool.	A potential market of more than 3.000 restaurant choices that will be offered to a potential pool of more than 600.000 app users, as well as tourists that arrive in both communities of Cyprus. Later plans to expand to foreign markets, with first goals being Greece and Turkey.	No domestic direct competitors. International ones like OpenTable, E-table, Eveve, Table-booking, ResDiary and others. The main competitive advantage of ReserveEat is that is does not require any additional software or hardware from restaurants and is much cheaper than any of the competitors.	Extensive market research, technical quotations from software developing companies, prototyping of the platform, creation of a business plan.	Funding, incorporation of the company, start of operations. Registration of 300 restaurants, 3.000 app downloads, 12.000 table reservations.	Yes	Yes	No	No	No	Yes	No	Yes	No	No	No	No	No	No	Yes	No	No	No	No	No	No	No	Yes	No	No	No	No	Yes	No	No	No	No	No	No
Map of opportunity	Early Stage	http://mapofopportunity.org	Sweden	Stockholm	2015	Social entrepreneurship & Impact	Concept only	A remote job and life opportunity map for refugees.	A remote job and life opportunity map for refugees. Map of Opportunity aims to help refugees find the best place to relocate to and empowers them for a better future. It provides them with useful city and country based information centered on recent and future job opportunities.	Annabel Nilsson - annabelpatzwaldt@yahoo.com Mikaela Saletti - mikaela.saletti@hyperisland.se Ilya Yudanov - ilya.yudanov@rga.com Alana Weibull - alana.weibull@gmail.com Wen Shi - ronger.wencens@gmail.com	A remote job and life opportunity map for refugees. Map of Opportunity aims to help refugees find the best place to relocate to and empowers them for a better future. It provides them with useful city and country based information centered on recent and future job opportunities.	jobb market	none	charity	Hopefully a more advanced platform	No	Yes	No	No	No	No	No	No	Yes	No	No	No	Yes	Yes	No	No	No	No	No	No	No	No	No	No	No	No	No	No	No	No	No	No	No	No
H4O	Early Stage	http://humans4ocean.com	Norway	Oslo	2015	Social entrepreneurship & Impact	Concept only	We have an idea to help the ongoing environmental cleanup of the ocean	Ghost traps, ghost fishing and littering of the ocean are a huge international problem. H4O is a social community app that connects divers, dive clubs, environmental organizations, fishermen and -women, with a goal to inspire and coordinate. The app uses open map data to help visualize the effort.	Ina Viktoria Kristiansen, Senior Graphic Designer. Kay Frode Kristiansen, Project Engineer. Lars Selstad, Developer.	H4O is a social community app that connects divers, dive clubs, environmental organizations, fishermen and -women, with a goal to inspire and coordinate. The app use a map that is created from open data sources in countries where this is available and help visualize the effort by the participants.	We don't know.	We don't know.	One hackathon and now Slush	One hackathon and now Slush	Yes	No	No	Yes	No	No	No	No	No	No	No	No	No	Yes	Yes	No	No	No	No	No	No	No	No	No	No	No	No	No	No	No	No	No	No	No
Helsinkgin seurakunta munkkiniemi	Normal	https://www.vapaaehtoistyo.fi/helsinki/	Finland	Helsinki	1985	Health & wellbeing	Concept only	Helping those in needs	-	-	-	-	-	-	-	No	Yes	No	Yes	No	No	No	No	No	No	Yes	No	No	No	Yes	No	No	No	No	No	No	No	No	No	No	No	No	No	No	Yes	No	No	No	No
busHopper	Early Stage	http://no.website.yet	Finland	Helsinki	2015	Transport & automotive	Concept only	A real-life public transporations game.	We're developing a startegy game that makes use of public transportations. We aim at adding some extra fun to the life of commuters and city-dwellers.	Ville Glad, Kari Korpinen, Adrien VEtterli	Our game system is unique and free. We make use of live data from public transport to immerge the players in a virtual reality 'battefield'.	The game can be implement in any city that has an open data access to public transportations.	None that we know of.	The concept was unveiled in May 2015 but the project is currently hibernating due to lack of resource/time.	We will actively recruit developpers and hopefully deliver the full app and register the first users.	No	Yes	No	No	No	No	No	Yes	No	No	No	No	No	No	No	No	No	No	No	No	No	No	No	No	No	No	No	No	No	No	No	No	No	No
AgileTraveler	Early Stage	http://www.agiletraveler.com	Iceland	Reykjavik	2015	Health & wellbeing Social media	Concept only	Travel app opening up the accessible world - despite our physical impairments	Lack of relevant access information adds to the real problem of limited accessibility. We are bringing to the market a handy tool to tackle this problem by collecting data on services that can be searched located and filtered by the users profile. Planning of short or long travels will be made easy.	Jón Steindór Valdimarsson, lawyer, experience from industry and company boards Ósk Sigurðardóttir, occupational therapist, project management in IT industry Jóhanna F Sigurjónsdóttir, 15+ years in the pharmaceutical industry and health related research, BSc biochemistry, MSc health sciences	Travel App that provides the physically impaired user tailored information, based on his profile, when planning long or short travels. The community of users will help building the information base and share experiences. Maps, pictures, ratings will be a vital part. Positive approach is key.	It is estimated that 1-2% of the population is using wheelchairs. On top of that family and friends are directly affected. In western societies people grow older and the number of physically impaired rises sharply( 10-15%). Inclusion and active participation is a part of human rights and wellbeing.	Solutions like WheelMap (German), GladTur (Danish), On Wheels and Ongehinderd (Dutch) can be defined as competitors. However we intend different approach and to make our app much more of a travel planner and more service oriented. Not just access to buildings but to services and entertainment.	In March '15 the idea entered "The Nordic Independent Living Challenge". Now it is one of 25 surviving ideas out of some 420. In December it will hopefully make it to the 5 finalists. The concept has been shaped and tested by potential users. Now the first digital mock-up is being built.	Finalise concept and digital mock-up Q4'15. Prototyping and testing Q1-Q2'16. Pilot in Reykjavik Iceland Q3 and marketing of Minimal Viable Product in all the Nordic Capitals by Q4. Further market expansion in the Nordic countries and Western Europe Q1-Q2'17	Yes	Yes	No	No	No	No	No	No	No	No	Yes	No	No	Yes	Yes	No	No	No	No	No	No	No	No	No	No	No	No	No	No	Yes	No	No	No	No
DAP Design	Early Stage	http://www.dapdesign.dk	Denmark	Copenhagen	2015	Social entrepreneurship & Impact	Concept only	Develops clothing solutions for differently abled people	DAP Design offers the service of re-designing existing wardrobes of people with physical disabilities. We do this to stimulate self-esteem, to encourage DIY and to re-establish a sense of personal choice in terms of what to wear.	Jeanette Kæseler. Founder. Have started and run an import business, closed it down and learned. Education wise I have studied political science at Lund University.	A range of clothing solutions, such as: 1) magnetic closing in shirts instead of buttons 2) label with braille to inform the blind of the color of clothes 3) A stitch on that enables you to close jeans with one hand	The market is the 10% disabled people who purchase apparel online, counting 300 million (3% of the world's population).	A majority of clothing manufacturers for disabled produce practical rather than fashionable clothes and we ask why not combine the two? Magnets used as closing mechanisms are already in use by designers like Ian Stikeleather. The list of adaptable apparel offers is long but the service offered isn't	Key metric has changed from focusing on the Nordic countries to a global scale, as the use of online e-commerce distributors are now in focus.	The strategy is to sell a collection of clothing solutions to online e-commerce distributors in course of the next 18 months.	No	Yes	No	No	No	No	No	No	No	No	No	Yes	No	No	Yes	No	No	No	No	No	No	No	No	No	No	No	No	No	No	No	No	No	No	No
Resbyte	Early Stage	http://www.restbyte.fi	Finland	Helsinki	2014	Enterprise software Analytics, big data & AI	Concept only	Modern web application development	At the moment we only have a few concept ideas but nothing relevant to pitch yet.	Joonas Teurokoski, Software Engineer. Markus Iivonen, Software Engineer and data science student.	Our concept idea is a real time data platform, which makes the relevant data intuitively accessible to all the people who could utilize it for better decisions.	Trend has long been to gather data. This trend has resulted in organizations having numerous databases, API's and machinery screaming "Take my data!". And we have takers: advanced analytics, predictive algorithms, KPI scripts, what not. What's still missing is the distribution of that derived data.	There're a few major players in the market but none of them offers the same end solution that our concept has. Our advantage is small organization structure, interest in new technologies and solutions, which gives us a fast way to develop our concept and adapt to the newest available solutions.	For last 2 years our company has been a side project. In this year we have put more effort to it and our turnover has increased about 1800% within last 12 months.	If we keep working on customer projects and hire more people our turnover can be increased drastically 1 person = 100k turnover. We've focused gather people who are good at what they do. At the moment 2 of us only work on customer projects but not doing full weeks.	Yes	No	No	No	Yes	No	No	No	Yes	No	No	No	No	No	Yes	Yes	No	No	No	No	No	No	No	No	No	Yes	No	No	No	No	No	No	No	No
Lollipop Audio	Early Stage	http://www.lollipopaudio.com	Norway	Oslo	2015	Gaming Music & entertainment	Concept only	A complete solution for video game recording, reducing costs significantly.	We specialize in creating tools that reimagine the audio production pipeline for video games by focusing on new approaches to recording, editing, and asset management software.	Jory K. Prum is the founder and chief engineer of Studio Jory, a video game recording company in the San Francisco Bay Area and Oslo. Jory was previously a sound designer at LucasArts, an audio gun-for-hire at Pixar, a web integrator at Disney, and an electronics tech at Jim Henson’s Creature Shop.	Lollipop is software that manages and dramatically improves recording for games. It significantly reduces studio hardware and software investment by integrating external solutions into a unified production toolset, and eliminates the requirement for highly specialized recording engineers.	Video games is an enormous market and audio production tools is largely ignored. Current market leaders develop tools only for linear forms of media production and fail to grasp the challenges inherent in making games. We will fill this niche and open up game recording to all recording studios.	The first company to build an end-to-end solution will dominate the market and replace traditional tools like Avid's Pro Tools, which accomplishes only around 20% of required tasks. Having recorded 150+ video games with 750k+ lines of dialog, we know how to solve complex game production problems.	The games industry continues to grow at an incredible rate, and most games need dialog production. Sales of games increased 8% from 2012 to 2014, hitting $22.4b in revenues. There are 2,200 recording studios in the United States alone, generating $1.5b in revenues.	With the reduction of work for music recording studios, games are an attractive industry to join. Lollipop wants to make sure all of these studios can handle game recording work.	Yes	No	No	No	No	No	No	Yes	No	Yes	No	No	No	Yes	No	No	No	No	No	No	No	No	No	No	No	No	No	No	Yes	No	No	No	No	No
Kaido.me	Early Stage	http://arhiva7.ro/clients/kaido/151103/home-v1.html	Romania	Bucharest	2015	Enterprise software Mobile	Concept only	Simplifying the world one digital product at a time	We are a tight-knit Romanian development team that gets kicks out of creating beautiful websites and engaging apps. We take complex issues and help you to build simple, intuitive and functional solutions that fit your business and bring simplicity to people’s lives.	Founder Dominic Brasoveanu has helped 100+ startups in their software development and design projects. Business Director Juha Mertanen is a Finnish serial entrepreneur with 5 successful startup companies.	We are a tight-knit Romanian development team that gets kicks out of creating beautiful websites and engaging apps. We take complex issues and help you to build simple, intuitive and functional solutions that fit your business and bring simplicity to people’s lives.	Companies engaging software, web and ecommerce development projects. Our experienced, skillful and flexible team helps to deliver your project on-time and on-budget.	IT consulting companies and in-house development teams.	We have grown from an idea to 23 people team with successful project deliveries.	We help your company bringing your innovative product to the market and achieve your business goals. We open sales offices to all Nordic countries to connect Romanian developers with local startups.	Yes	No	No	No	Yes	Yes	No	No	No	No	No	No	No	Yes	No	No	No	No	No	No	No	No	No	No	No	Yes	No	No	No	No	No	No	No	Yes
DuuniBuumi Oy	Normal	http://duunibuumi.fi	Finland	Helsinki	2014	E-commerce & online marketplaces	Going to market	DuuniBuumi is a consumer service for finding employees for short time jobs.	At DuuniBuumi we make your life easier by offering an easy and a reliable marketplace to outsource your household tasks to others and enjoy your spare time like never before. At the same time by outsourcing your tasks, you provide job opportunities for those who are in need of work.	Erik Back CEO: First year business school student. Tommi Ekholm: CTO: First year business school student. Jussi Kaijalainen: Lead developer. MSc Tampere university of technology. Partner Wingmen Ltd. Juha Kalamies: Lead developer. MSc Tampere University of Technology. Partner Wingmen Ltd.	An online peer-to-peer marketplace where households and small companies can outsource tasks and jobs . Users name the task they need done and the price they are willing to pay for it, and a network of service providers bid for the task.	The addressable market is big. With the help of Uber and AirBnb, the time for sharing economy is now! The US market is pretty crowded with TaskRabbit and Thumbtack conquering for the hottest market around. That is why our target markets are the EU countries and especially the Nordic countries.	In Finland and the rest of the Nordics, the competition is not significant. Right now there is not a big player that is dominating the market. Our goal is to be that big player. Our advantage is that our marketplace is free of charge for private people and we are one of the firsts on the market here	We launched our beta-version of our product in april 2015 and our main-version in august 2015.	Our goal during the next 18 months is to establish an overpowering market position in Finland, and in 2016 expand to Sweden.	Yes	Yes	No	No	No	Yes	No	No	No	No	No	Yes	No	No	Yes	No	No	No	No	No	No	No	Yes	No	No	No	No	No	No	No	No	No	No	No
has.to.be	Early Stage	http://has-to-be.com	Austria	Radstadt	2013	Industrial internet & IoT Transport & automotive	Going to market	has.to.be makes electric recharging as easy as refuelling gas today.	has.to.be is the B2B innovation leader in cloud-based electric vehicle charge point management platforms! Our solutions are designed to optimise processes, create sustainability and enable new business opportunities in the e-mobility and renewable energy space.	Martin Klässner, CEO/CTO - serial entrepreneur, 10 yrs experience in consulting & software development Alexander Kirchgasser, COO - management experience in kiosk- & digital signage project for Microsoft, Roche. Jakob Sterlich, Sales & BD - Software sales at SAP & building up a smart home startup.	Our SaaS offering is called be.ENERGISED, it is a management and billing platform for electrical charging stations that allows anyone to sustainably operate a charging infrastructure for electric vehicles. Our target audience are utilities, automotive companies, gas stations an car park operators.	- 6.1 million charging points (CP) by 2017 in the US and Europe - CP sales revenues expected to reach > USD 10,4 billion by 2021 - excluding operations of CPs. The market is heavily dependent on market success of electric vehicles (EVs). By 2020, > 20 million EVs are expected to be on the road.	NTT Data, Now! Innovations, enio, ICU, The New Motion, Charge Point Our USPs are: - Affordability & ease of setup - Broad white label offering (EMP backend, mobile website, end-customer portal) - Task- & ticket management - Extensive APIs for Roaming and other third party integration	Our key metric are the # of transactions/charging station, this metric is heavily dependent on the overall e-mobility market. Key KPIs for now: # of customer: From 0 to 13 # of connected charging points: From 0 to 980 # of resellers & distribution partners: From 0 to 7	Strategy: Hire team members, switch from inbound to strategic, outbound sales, geographic expansion, presence at all major trade fairs & exhibitions, setup of reseller network, development of new features & revenue streams. Goals: # of connected charging points in 18 months: 4500	Yes	No	No	Yes	Yes	Yes	No	No	No	No	No	No	No	No	No	No	No	No	No	No	No	No	No	No	No	No	No	No	No	No	Yes	No	No	No
Yoogaia Oy	Normal	http://yoogaia.com	Finland	Espoo	2013	Health & wellbeing	Going to market	Yoogaia is the first live, interactive online yoga studio in the world.	Yoogaia is the first live, interactive online yoga studio in the world. Yoogaia enables its users to attend live, interactive yoga classes wherever they are. Now available globally in the App Store.	Mikko Petäjä, Piia Maaranen, Tomi Mickelsson, Kaisa Soininen, Katja Wickström	Yoogaia is the first live, interactive online yoga studio in the world. We make it easier for people to fit more wellbeing into their everyday lives all around the world.	$500B	YouTube, online video archive services, fitness apps, yoga studios and gyms.	10 x sales and users	10 x sales and users due to the global expansion.	No	Yes	No	No	No	No	No	Yes	No	No	Yes	No	Yes	No	No	No	No	No	No	No	No	No	No	No	No	No	No	No	No	Yes	No	No	No	No
RTS Energy Inc.	Early Stage	http://www.rts-energy.com	Korea, Republic of	Seoul	2010	Cleantech	Going to market	Smart Energy Solution Provider(MLPM System) for renewable Energy	RTS Energy is working as a smart energy solution provider by combining the advanced power electronics, IoT and Custom Integrated Circuit Technology for the renewable energy industry such as Solar sytem, Electric Vehicle, and Energy Storage system.	Dr. Kyungho Cho, who is a CEO and Founder, has more than 30 years experience for high-Tech technology industry, especially for Power electronics sytem, Digital Communication system,Integrated system and circuit Design.He has been with Intel Inc. Lucent Technoly, and HItachi Ltd. and LG Electronics	Microconverter and monitoring system, which are major products,has the following three features.1) It could increase the Power efficiency up to 25% more.2) Gives easy operating and maintenance.3)provide safty function which can gives immediate control and alert functions for th Solar Power Plants	1) The Solar Power Plant owners which can be existing or newly built Solar Plant2) The EPC companies3) Solar Module company for Smart Solar module which can add a value to the existing conventional Solar Module 4) the solar power plant owner who want to add a intelligent monitoring functions	There are two major players in this industry, which is named Solaredge and Tigo Energy. Even if they have big shares, RTS Energy has several unique features which is NOT implemented in the competitors and Performance-wise, RTS Product has better.	Revenue, which start from mid-2014 first because company had been focusing to research and Development for the past 4 years and successfully completed first production on early 2014. During the past 12 months it was not so big because of no experts in marketing and sales area.	the company is focusing to develop marketing tools and sales arms in the Domestic market first during 2015. If this plan will go smoothly, from 2016, the company will go abroad to international market such as China, EU, and USA and the goal is $3.5M in 2015, $8M in 2016, and 17.5M respectively.	Yes	Yes	No	Yes	No	No	No	No	No	No	No	Yes	No	Yes	No	No	No	No	Yes	No	No	No	No	No	No	No	No	No	No	No	No	No	No	No
My Name Is Consumer Oy	Early Stage	http://www.consmr.me/	Finland	Helsinki	2014	Mobile E-commerce & online marketplaces	Going to market	Offline store exclusive retail app to buy, sell and rent new and used fashion	Global mobile app for fashion retail. Operates through existing offline stores. Store exclusive. Service brings together consumers, selected stores and brands. Products are always available regardless to their location. Consumers will experience personalized, predictive and contextual offering.	Founders: Tero Helenius and Jay Magnusson. +10 years in developing international retail concepts. Key members: Lauri Taipale, frontend Timo Särkikoski, backend Teri Niitti, stylist Sampsa Jaatinen, personalization Timo Nisula, advisor/investor Jaakko Kankaanpää, advisor/investor	B'n'm stores haven't been able to offer their customers products they want 'cause of the limited stock. Online stores have used that niche falling into browsing mode. CONSMR.ME service turns the odds and allows consumers to get full but personalized offering the store through their own mobile device	First target markets are Scandinavia, western Europe + Spain and US. Market size is about 400bn in both Europe and US of which our customer segment covers about 15%. Commission per transaction 5-25%, average 15%.	Similar service does not excist. The main competition is in e-commerce. Any online store like Etsy, Asos, Zalando, Nelly, Netaporter or My Theresa is competition. Concept wise Farfetch, House Account and Spring are the nearest competition.	Service has gained good number of both brands and store locations. Due to the piloting stage we have not gone max out with the customer acquisition yet.	200 brands, over 200 store locations and 2,4M transactions/year. Average purchase 80 euros / transaction.	No	Yes	No	No	Yes	Yes	No	No	No	No	No	No	Yes	No	No	No	No	No	No	No	No	No	Yes	No	No	No	No	No	No	No	No	No	No	Yes
MainLaws	Early Stage	http://mainlaws.com/	United Kingdom	London	2015	Virtual reality E-commerce & online marketplaces	Going to market	MainLaws is online marketplace for legal services.	MainLaws team is focused on utilizing technology to make legal services more accessible. We know how hard it can be to find the right lawyer who is available and within your budget. Instead of wasting your time searching and going to a law office, just tell us what you need.	Marta Adranowska - Corporate and Startup Attorney, PhD in Contract and Commercial Law, LLM, Mathematical Logic. Previously worked for IBM. Joanna Skolimowska - Head of Operations, MBA, MSc in Economy, PD in SAP. Previously worked for arvato Bertelsmann and Liberty Global.	Online marketplace with legal services tailored to the needs of clients. Free account, global legal network and entire workflow managed online. 24/7/	Target market: startups, small and medium companies and solo-traders.Geo: Europe, North America, Asia	Traditional Legal Offices and freelancers offering monthly plans. Elance Upward Rocket lawyers	MainLaws was incorporated in February 2015, demo product launched in March. 100 clients served during 90 days of tests. Open product launched on 5th of October. Growth: 2 clients per day.	Growth & scale. 5 clients per day at the end of 2016.	Yes	Yes	No	No	No	No	No	No	No	No	No	Yes	Yes	No	Yes	No	No	No	No	No	No	No	Yes	No	No	No	No	No	No	No	No	No	No	No
Cozify Oy	Normal	http://en.cozify.fi/	Finland	Espoo	2015	Industrial internet & IoT Consumer electronics	Going to market	Cozify - The Heart of the Smart Home.	As the Internet of Things matures, more smart devices creep into our homes and result in a clutter of apps that are not intelligently interconnected. Cozify Hub easily automates smart devices across different application silos - such as energy, security and lighting.	Kimmo Ruotoistenmäki, CEO, specialist in technology, product managment and business (fi.linkedin.com/in/kimmoruotoistenmaki/en) Tony Risikko, master of customer engagement (fi.linkedin.com/pub/tony-risikko/0/51/648/en) Antti Vihavainen, channel strategy (fi.linkedin.com/in/anttivihavainen/en)	Cozify smart home solution differentiates with: 1. Elegant and robust rule engine 2. Focus in automation and intuitiveness of the user interface which has been designed for the early majority 3. Understanding and support of the service provider requirements	We have identified three main target groups: "urban hipsters", "hubby&wife" and "active seniors". According to our own market research there are 17 m households that have planned to buy home automation within the next 2 yrs in Germany alone. Globally a $100bn market by 2020.	1. Qivicon - user experience depends on the channel partner - very confusing for users 2. SmartThings - only a device company as opposed to Cozify's Home Automation as a Service 3. Zipato - automation requires programming skills while Cozify developed intuitive drag'n'drop UI	Since last summer we have gone from MVP with 20 consumers to proprietary HW&SW, scalable logistics, web store availability for continuous experimentation and trials with strategic channel partners in Scandinavia and Western Europe. These channel partners are large retailers and ISP's.	By the end of 2016 Cozify will have strategic channel partners in Scandinavia, UK, Germany, NL, and Austria. We aim for exclusive relationship with service providers that will use their brand and trust to convince consumers about smart homes. Order intake: Q4/2015: 5000, Q4/2016: 50000.	No	Yes	No	No	No	No	No	Yes	No	No	No	No	Yes	Yes	No	No	No	No	No	No	Yes	No	No	No	No	No	No	No	No	No	Yes	No	No	No
Envitems Inc.	Early Stage	http://www.envitems.com/	Finland	Tampere	2013	Industrial internet & IoT Cleantech	Going to market	Envitems offers solutions for demanding air quality monitoring applications.	Envitems Inc. is a Finnish company specializing in cleantech, air quality measuring instruments, in particular. We design and manufacture air quality stations that are used to measure the pollutants and particles of ambient air. We believe that our products will make the future a little better.	Mr. Eero Alkkiomäki, founder & CEO, M.Sc, over 10 years of HW/SW design, serial entrepreneur Mr. Kari T. Mäkinen, MotB, strong marketing background in several companies such as Nokia Ms. Outi Alkkiomäki, Master's Degree in English and PR, marketing director at Envitems Mr. Vesa Pikki, SW wizard	Envitems' products revolutionize measuring air quality. We offer cost effective, compact solutions to monitoring air quality and meteorological data. The previous air quality stations cost $$$$$, ours $$ - still doing the same thing.	The global air quality market is currently 3-4 billion dollars yearly, and the market grows approximately 10 % every year. The largest growth period of the market is estimated to be still ahead. Envitems regards that its new and unique product has great potential in gaining market share.	Traditional air quality measuring equipment is expensive, bulky and maintenance intensive. The Envitems E4100 breaks this mold with a design that prioritizes convenience, reliability and compact packaging.	We have sold our devices to six different country so far. Envitems has started marking 6 months ago and the results are promising.	Our reasonable target is to gain revenue over 1 Meur within 18 months. To achieve that we have to scale up our production and boost marketing.	Yes	No	No	Yes	Yes	No	No	No	No	No	No	No	No	Yes	No	No	No	No	Yes	No	No	No	No	No	No	No	No	No	No	No	Yes	No	No	No
Video Analysis Technologies, LLC	Early Stage	http://tevian.ru	Russian Federation	Moscow	2010	Analytics, big data & AI Mobile	Going to market	Face recognition for video surveillance and customers’ identification	Video Analysis Technologies specializes in computer vision for video surveillance and biometry. Main products are face detection and recognition software library, video management system with integrated people detection and logging, face based loyalty program participants’ recognition system.	The company has two founders: Vadim Konushin and Anton Konushin. Anton is a head of Computer Graphics and Media Laboratory in Moscow State University. Vadim is a CEO of the company. Currently company consists only of researchers and software developers, all are alumni of the laboratory.	1) VA FaceSDK - face recognition software library; 2) Video Concierge – video management system with integrated people detection provides easy way to browse through photos of people, captured on camera; 3)Loyalty program participants’ face recognition system as an alternative to common loyalty cards	1) Face recognition engine is licensed to video surveillance and digital signage companies. 2) Video Concierge focuses on the video surveillance market for households and small companies. 3) Loyalty program participants’ face recognition system targets to replace plastic discount cards for retail.	Both face recognition engines and video management systems are highly competitive markets with many participants. Currently plastic discount cards dominate loyalty program participants’ recognition market. Several projects try to replace them by mobile applications or NFS.	The company has recently released face recognition software library and is still working on its own video management system. Loyalty program participants’ face recognition system is currently being tested in one of Moscow premium clothing store chains. Planned revenue in 2015 is around 100k USD.	In 2016 both own video management system and the loyalty program participants’ face recognition system are planned to be released. Revenue in 2016 is estimated at 300k USD.	Yes	Yes	No	No	Yes	No	No	No	No	No	No	No	No	No	No	Yes	No	No	No	No	No	No	No	No	No	No	No	No	No	No	No	No	No	Yes
SunTori	Early Stage	http://suntori.co	Finland	Helsinki	2015	Social entrepreneurship & Impact	Going to market	Smart energy, clean tech solutions, and sustainability to developing countries.	SunTori Ltd. delivers high-quality, cost-effective, and reliable energy sources, specially solar power to emerging markets. Alongside clean tech solutions developed from Finland and around the world, we want to answer the challenges for smarter living and more sustainable environment.	Jani Kasper, Carlson Ygot, Eduardo Ygot, Sheila Riikonen	SunTori delivers renewable energy solutions and standalone clean tech products and services. Partnerships with best-of-breed “Green Manufacturing” providers using only ecological manufacturing and recycling processes. Our promise is to deliver and bring them to the doorsteps of emerging markets.	OFF-GRID Community Solar Projects in ASEAN (Philippines & Malaysia). SunTori . works with technology partners and solution providers to deliver customized and unique solutions for our target groups in developing countries.	Healthy competition with wearable technology solar providers, but they have become our suppliers as well. We have access to fast growing markets with high potential for growth.	Customers in 3 countries for the WEBSHOP http://suntori.eu. Opening of sister company in Asia (The Philippines).	Recruiting Mentors and advisors Launch a product	Yes	Yes	No	Yes	No	No	No	No	No	No	No	Yes	Yes	No	No	No	No	No	No	No	No	No	No	No	No	No	No	No	No	No	No	No	No	No
Parking Energy Ltd	Early Stage	http://parkingenergy.com	Finland	Espoo	2014	Cleantech Energy	Going to market	Electric Vehicle charging made affordable and ubiquitous.	Electricity is everywhere, so why is not EV charging? We make it simple and affordable. 2017 will mark the year of the EV market boom.	FOUNDERS Jukka "akkujukka" Järvinen: A legendary name in all-EV circles. Owner of patents, starter of factories. A visionary and a mover. Heikki Suonsivu: Serial Enterpreneur, including founder of Europe's first ADSL consumer internet operator. TEAM+ Jiri Räsänen, CEO: Founder of eCars - Now!	A simple service of EV charging for the complicated real estate environment. In real-life real estate environment, who makes decisions for what investments and services can get muddy and complicated. Parking Energy offers a simple, affordable and comprehensive service model that delivers.	First we take Finland. Global.	New market. Several competitors from different market corners, but no-one has the same focus as us. We can make market disruption happen.	1st round funding: Target reached. R&D: Progressing steadily. Markets: Keen to see our offer.	1.0 Service product out in Q1/2016.	Yes	Yes	No	Yes	Yes	Yes	No	No	No	No	No	No	No	No	No	No	No	No	Yes	No	No	No	No	No	Yes	No	No	No	No	No	No	No	No	No
TRINE	Early Stage	http://www.jointrine.com	Sweden	Gothenburg	2015	Social entrepreneurship & Impact Financial & payment services	Going to market	Crowdinvesting platform for high impact solar projects in emerging markets	TRINE aims to eliminate energy poverty. Using a unique crowdinvesting platform, we invest in solar energy projects which provide remote communities with electricity. TRINE makes it easy for people to support high impact solar energy projects, while also earning a return on investment.	Sam: Former Sales Director of Bosch Solar NA, $100m finance for solar projects, Double Degree, Engineering & Business Andreas: Former solar BusDev in emerging countries, Crowdfunded for orphanages in KE, MSc, Sustainable Energy Christian: Scrum Master, Kanban Leader, MSc Computer Sciences	Our solution allows both local populations and European investors to make money by giving people in developing areas a better alternative to costly dirty fuels. It allows investors to have a very specific impact and earn a return, making it more attractive than charity.	TRINE operates in the intersection of crowdfunding and renewable energy finance, two fast growing global markets. Solar energy access is estimated to grow from $0.2 billion to a $12-$40 billion annually market in the 2020-2030 window.	Globally there is only one start-up, SunFunder, attempting to build a similar business. However, due to crowdfunding legislation in the US they cannot give a real profit to their crowdfunders, preventing their model from scaling up and letting them move to institutional investors.	Early-stage start-up, no data yet	We expand in the Nordic and enter the UK market, hiring local solar region managers, operating in 3 solar regions and having 10-15 solar partners signed up with 85 funded campaigns. We introduce new platform features and have local country managers, pilot an ambassador program. 500% growth	Yes	Yes	No	Yes	No	No	No	No	No	No	No	Yes	No	No	No	No	No	No	No	No	No	No	No	No	No	No	Yes	No	No	No	No	No	No	No
Nornir	Early Stage	http://www.nornir.no	Norway	Oslo	2013	Enterprise software Industrial internet & IoT	Going to market	Game changing linking technology for IoE/IoT. Internet 4.0; the Real Time Web	Real Time Web is a self scaling linking network that one day will become bigger than the World Wide Web. The linking technology has been enhanced to support IoE and IoT resources so anyone can start linking physical objects into their web pages or services.	Paal Kristian Levang, Founder; The inventor of SynxBIOS kernel, a new generation operating system kernel for the web - giving physical objects an identity online. The team has an average of work experience above 20 years, and the average of education is above 5 years of university degrees.	Four tools living in a symbiotic relationship to build up an ecosystem for a new RealTimeWeb global network. ( Synxbios.com, Cybernetdomain.com, Draape.com, Nornir.no ) The RealTimeWeb network enables physical things to be connected and controlled by end users and service providers.	Game changing technology for the largest market in the world, the World Wide Web. WWW consist of more than 10 Trillion web pages and grows by 50% per year. Our tool can protect data and trade them in an open network. We provide domain owner a tool for setting up recurring business world wide.	Our Real Time Web network has several advantages above the World Wide Web. Web pages can be set up for IoT/IoE without using databases, servers and programming interfaces (API). This saves a massive development and maintenance cost for SW and HW development. Holy Grale within secure open networking.	We launched one vertical product (Nornir.no) in august 2015 which is our reference case with proven technology. Over 50 customers on waiting list since then. We have our own demo/test arena (city) and agreement with municipality of Steinkjer, Norway. We arrange our own things4web partner conference	Revenue on pre-launched product. Urgent need of bridge financing to grow faster. Next three product will be launched in 2016 where we expect Facebook like growth. Break even expected for B2B market in mid 2016 and for the public market in mid 2017. Then exponential growth. Multiple Exits in both V/H	Yes	Yes	Yes	No	No	No	No	No	No	No	No	No	Yes	No	No	No	No	No	No	No	No	No	No	No	No	Yes	No	No	No	No	Yes	No	No	No
Visiba Group	Early Stage	http://www.visibacare.com	Sweden	Gothenburg	2015	Enterprise software	Going to market	Enterprise software for virtual health care.	Visiba Care is an enterprise software for the global health care industry. Using Visiba Care, health care providers can offer care takers their services online. Through video visits in mobile and web, online waiting rooms and secure chat features we make health care as modern as it should be.	Johan Gustafsson, CEO: +12 years in sales, business development and managementSamuel Sporrenstrand, CTO: 15+ years of experience in software developmentAndreas Larsson, Head of sales: +10 years in B2B sales/managementUlf Nilsson, CFO: Former CFO for several international companies.	9 out of 10 want to see their doctor online. And health care providers need to work more efficiently. Visiba Care enables health care providers to see more patients per hour with better outcomes.KDF: We are a platform for virtual care, taking care of reminders, patient flows and video visits.	Our current primary markets Sweden, Finland and United Kingdom has according to market reports from Deloitte a potential value in yearly eVisits, of 8,7 billion euro. Research shows that up to 50% of all primary care visits can be replaced by an online doctors visit.	Vidyo, Skype and Cisco: We offer much more than just video communication. MeeDoc (FIN), Kry (SWE) and PushDoctor (UK): They are B2C and we are B2B. Tieto, Datawell and other companies connected to the health care industry could become competitors.	Our product was released in March 15th 2015. The last six months we have acquired 15 customer accounts with nearly 100 care givers working with our software.	We are going from 15 000 euro in September 2015 monthly revenue to 170 000 in monthly revenue in February 2017.In 18 months we are aiming at close to 300 health care providers on board. We are established in Sweden, Finland, United Kingdom and have begun establishing at number of new markets.	Yes	No	No	No	No	No	No	No	Yes	No	Yes	Yes	No	No	No	No	No	No	No	No	No	No	No	No	No	Yes	No	No	No	No	No	No	No	No
720 Degrees	Early Stage	http://www.720.fi	Finland	Helsinki	2015	Analytics, big data & AI Enterprise software	Going to market	Great workplaces through data, like Google Analytics for office spaces.	Helping companies with healthy & productive workplaces. Addressing leading challenges in corporate real estate & facility management through analytics of quantitative data from sensors, buildings and occupants. Working with customers such as Danske Bank, Nokia, DNA, YIT, Lassila & Tikanoja.	Tomas Novotny, CEO & founder, serial health & tech entrepreneur. Rick Aller, COO & partner, international sales across Europe. Simon Burg, Director of Product, degree in AI. Samy Clinchard, data analyst, previously R&D at Rovio. Joanna Kauczor, data analyst, PhD in computational chemistry.	720° is cloud-based analytics solution to optimise office spaces for employee health, wellbeing and productivity, utilising sensor and occupant data. The solution is the first of its kind replacing traditional consulting approach for optimisation and the first analytics of indoor air and acoustics.	720° targets primarily enterprise customers with 500+ employees, secondary market are educational, healthcare and public facilities. Combined EU & US Total Addressable Market (TAM) for enterprise and other facilities is close to €20 billion. The company currently benefits from 1st-mover's advantage.	720° is about 12 months ahead of known competitors, it was the first to commercially deploy advanced indoor environmental quality sensors into buildings and the first to provide advanced analytics based on the data. Competitors: qwiksense.com, aretas.ca, yanzi.se, rapal.fi, cubesensors.com (B2C)	Since the launch last year the company added many corporate customers in Finland, such as Accenture, Danske Bank, Nokia, etc. In past 12 months customer acquisition cost (CAC) have decreased 5x, sales cycle shortened, and sales grow 40% quarter from quarter with same headcount (400% year to year).	New customer acquisition in Nordics will be main source of growth with additional revenue from customer expansions across their other offices. Expansions will drive revenue per customer metrics up. Revenue (ARR) will reach 1M+ in 18 months, in the meanwhile 720° will prepare to enter US market.	Yes	No	No	No	Yes	No	No	No	Yes	No	No	No	No	Yes	No	Yes	No	No	No	No	No	No	No	No	No	Yes	No	No	No	No	No	No	No	No
Medigoo	Early Stage	http://www.medigoo.com	Finland	Helsinki	2007	Health & wellbeing Med tech & pharma	Going to market	Medigoo sells home medical diagnostic test kits and provides free health info.	Medigoo offers to consumers professional medical health self-tests like Cholesterol, Cancer pre-indicator, Heart attack, STD tests and DNA tests. Live healthier, Live longer.	-New recruit, CEO. We are negotiating with a candidate for this role, he has a background in health tech field. -Marko Karhiniemi, COO. Previous Nokia, UI, UX, Patents, Specialty background. -Mika Karilahti, CIO. Previous Nokia, Samsung; Sourcing and Sales background.	Home medical diagnostic test kits. These products save more time and money to the consumers than going to the doctor, asking for a lab test , and then having another appointment to hear the analysis results. Most of our test provide the results in a few minutes and are 95-99 percent reliable.	Self-testing of health is a rising trend. These tests have so far been done is labs and are now available to the consumers. The global lab market size is 17bn USD, and the home testing in Europe is estimated to be one million USD, but is increasing rapidly.	The market is still very small. Of our four major European competitors, two are actually our suppliers. We currently have the largest self-testing potfolio in the Nordic Countries, and we expect to have the largest portfolio for consumers in all Europe at the time Slush 2015 takes place.	1. We launched website at Slush 11/2014. We are increasing the site ranking and the number of visitors. 2. We launched webstore in 03/2015. We have been increasing the product portfolio. 3. We are now putting our efforts on sales for H2/2015. We expect to sell products worth of 50k USD in H2.	Our priority is clearly working on the sales. We are so far selling products online. We now intend to also sell them to private and public healthcare, and specialty shops. At a later point in time we will push them into supermarkets.	Yes	Yes	No	No	No	Yes	No	No	No	No	Yes	Yes	No	No	No	No	No	No	No	No	No	No	No	No	No	No	No	No	No	Yes	No	No	Yes	No
MysteryVibe	Early Stage	https://www.mysteryvibe.com/	United Kingdom	London	2015	Biotechnology Consumer electronics	Going to market	Making bedrooms fun with empowering tech - Your body, your pleasure, your way.	At MysteryVibe we design & create beautiful pleasure products that are simply intuitive, multi-sensorial and full of layered delights. Our vision is to make bedrooms more fun through IoT with music, erotica, aromas & toys all working together to adapt to the user & make pleasure truly personal.	Soumyadip Rakshit, CEO: PhD in Pattern Recognition, previously ran & successfully exited biometrics startup, Experience at Deloitte Consulting. Rob Weekly, CTO: Specialist in electronics and embedded software development, 25+ years experience with BAE Systems, QinetiQ, e2v, Aspex, Nokia	Crescendo is the world's first 'platform sex toy' and is truly user-centric. - It can be bent to take and hold any shape to adapt to every body - Has 6 powerful yet quiet motors whose vibrations can be individually personalised through the smartphone app - Women-designed, every step of the way	The market for sex toys & accessories globally is estimated to be over $20b, a big proportion of which is in the USA - and the marketing is exploding thanks to 50 shades & liberation. Target customer demographic is women from 25-55 with income of $40k, globally via retail partners and directly.	Sex toys fall under 3 general segments, fun (Ann Summers), innovative (OhMiBod) & luxurious (Lelo). They range in price from $5 - $300. We are uniquely placed in the middle of those 3 segments with our luxurious brand, fun app & with deep research & innovation - a real 'layered delight'.	We launched for pre-orders at TC DisruptNY last month (May). That generated great press coverage who loved our passion to put the user back in the centre of pleasure. We got featured in TechCrunch, FastCompany, Glamour, Bloomberg & many others. With zero marketing we already got $60k in revenue.	We are building close relationships with leading online and offline retailers across the world from USA to NZ. We already have intent from GoodVibrations (USA), Bondara (UK), Amorelie (Germany, Austria), Amorana (Switzerland), Adam&Eve (Australia) etc. This will help us scale rapidly once we launch.	Yes	Yes	No	No	No	No	No	No	No	No	Yes	No	Yes	Yes	No	No	Yes	No	No	No	Yes	No	No	No	No	No	No	No	No	No	No	No	No	No
Apped	Early Stage	http://www.apped.com	Finland	Helsinki	2015	Mobile Enterprise software	Going to market	Apped frees the information workers by new kind of mobile productivity Apps.	Apped was formed in February, 2015 to set free the information workers of the world. No more clocking in, no more tiring routines or syntax errors from ancient legacy systems. We say let IT do what it was meant to do: take us to the future in new and exciting ways. What’s more, let’s let people be p	Board: Ari Rahkonen (ex-GM of Microsoft Finland), Aki Antman (CEO of Sulava), Tero Virtala (ex-CEO of RedLynx), Kimmo Rasila (senior board expert). Team: CEO Peter Lindberg (international career with digital services, eMBA), CTO Mikko Lampi (ex-CTO of Innofactor).	Apped Apps bring gamelike features and usability to corporations with a new delivery model. Each App solves one of several bottle necks in business routines. Apps integrate directly with company's data and bring instant value without requiring integrations, development of MDM solutions.	Apped's first market are corporations in the middle of cloud transformation. Microsoft cloud serves already 425 million customers with yearly growth of 96%. All SaaS platforms total over one billion users.	SalesForce Force.com mobile ecosystem is closest to our model. SAP and IBM are moving fast to corporate mobility. Apple and Microsoft are also building their own solutions. Google for Work has some similarities as well.	-	-	Yes	No	No	No	Yes	No	No	No	Yes	No	No	No	Yes	No	No	No	No	No	No	No	No	No	No	No	No	Yes	No	No	No	No	No	No	No	Yes
LiveRing	Early Stage	http://www.livering.com	Finland	Helsinki (and LiveRing, Inc. in Delaware)	2015	Social media Communications & media	Going to market	A social networking app that let’s groups of friends enjoy LIVE video moments	LiveRing lets you tap into your friends’ lives whenever something is going on and lets you experience moments together in real-time. A LiveRing moment gives you the feeling of truly belonging, understanding, and being present through face-to-face interaction with your friends.	Daniel Holmström, CEO, Co-founder: previously CEO and Co-founder at Promotion Point with 200 employees, MSc Finance.Markus Pukari, Co-founder: currently also CEO and Co-founder at Promotion Point Ossi Tiltti, Advisor (CTO), Co-founder: currently also Technical Director at Rovio+4 engineers	LiveRing provides many-to-many live video moments for groups of friends - sending out a tagged invitation makes it social and easy to join your friends live. In addition to 'traditional' passive sharing of pictures and video clips users can experience things together when they happen.	Core target group: young adults and teenagers. The ‘video chat’ market has grown to about 380 million users in 2015. We believe that the growth for live video will start booming from 2015. Gartner Research ‘Predicts Live Video Broadcasting Will Be the New "Selfie" By 2017’.	We divide our competitors into two categories: video calling or streaming, and social networking. Skype, Facetime, Oovoo, and Google Hangouts provide video calling. Livestream, Ustream, Meerkat and Periscope are focused on one-to-many broadcasting. In social networking there are several others.	Product is still in beta / soft launch with some key product features being developed. The core of service, live video, works well. We have validated with tests in markets, we have some use and people invite their friends. Set to launch October 2015 - updates in autumn :)	Launch in early October, focus on engagement and virality within user's groups of friends - achieving network effect and value for users. Key features for support under development: web client, adding content and engagement.	No	Yes	No	No	No	No	No	Yes	No	Yes	No	No	No	Yes	No	No	No	No	No	Yes	No	No	No	No	No	No	No	No	No	No	No	No	No	No
Zenniz	Early Stage	http://www.zenniz.com	Finland	Espoo	2013	Industrial internet & IoT Health & wellbeing	Going to market	Zenniz has developed the world’s first affordable tennis tracker.	Zenniz's solution makes automated line calling, coaching and social interaction possible in tennis. Comparable services are very popular in other sports. Our patent pending, new sensor technology costs 1/10 of existing solutions.	Vesa Mikkola, Co-Founder, CEO has been responsible for $300m sales and marketing investments and he has won NSN's deal of the month price (>$200m deal). Juha Toivanen, Co-Founder, CTO’s PhD research has been a critical asset to develop new breakthrough algorithms. Juha also holds an MBA from Oxford.	Our solution makes automated line calling, coaching and social interaction possible in tennis. The solution consists of on court device and cloud based post game service. Tennis is an over $10B sport overall and competitors are able to target < 1 % of this market due to their high cost level.	Based on our market study, pilot sales and comparison against other sports, the value of automated refereeing, statistics and coaching supports can be 10 % of the total tennis market size. Tennis market is an over $10B market.	There are two competitors on the market. The key difference between us and the competitors is price. Existing solutions are far too expensive for widespread use due to different technology. Zenniz solution offers a no-brainer investment opportunity for the clubs to bring their courts online.	We started a commercial pilot in one Finnish tennis club in December 2014. Around 300 players have tried the system. 80-90% of players like the service and are willing to pay continuously as much as we modeled in our financials.	Zenniz has just got a mass production version ready and international sales activities have started. There are 400 000 tennis courts in the world and Zenniz wants to reach 1 % penetration of these courts during the coming 18 months period. 1 % of courts is enough to reach a break even.	Yes	No	No	No	Yes	No	No	No	No	No	Yes	No	Yes	No	No	No	No	No	No	No	No	No	No	No	No	No	No	No	No	Yes	Yes	No	No	No
Muuvin	Early Stage	http://muuvin.com	Finland	Helsinki	2015	Communications & media E-commerce & online marketplaces	Going to market	Muuvin will do to Real Estate what Airbnb did to hotels and Tinder to dating.	Muuvin is matching homeowners with potential buyers. We combine online real estate listings and saved searches with Airbnb/Tinder-like matchmaking mechanics. Selling, buying or just following the value – imagine accessing saved property searches matching your criterias.	Lars Carlsson (1979), Business development (Concept owner) Samuel Thesleff 1978), Business development Sami Nikkinen (1990), Service designer and graphics (Creative lead) Joonas Teurokoski (1988), Backend developer (Tech lead) Leevi Huhtamaa (1979), Frontend developer (UX lead)	Buying? We match your criteria with both on- and off-sale homes. Owning? You get direct notifications of searches matching your home and possibility to contact interested buyers. Customize your feed, collect your favourites or make watches for interesting areas.	The opportunity is global, but as an example the commercial real estate industry only in Finland is 500+ MEUR (fees collected by providing consumers with information that already is, or at least should be, available to them via Internet). Homes for sale (FI) ~42.000, private homes (FI) ~2,7 million.	Online, mainly local listing services. Our benchmarks include Finnish services like Oikotie and Etuovi and US sites like Trulia and Zillow. None of the mentioned has adopted our "consumer first" approach assumably because of their main source of income being real estate agencies/agents.	We will launch the service 2015-2016 using a local/micro-market growth hacking. We collect usage data extensively, but key metrics will include sessions, interactions, homes, listings as well as conversion from free to paying user.	Localising our service (.fi, .se etc. compared to a generic .com) will be of significance. More detailed plans will be made as we ramp up for launch.	No	Yes	No	No	Yes	No	No	No	No	No	No	No	Yes	Yes	No	No	No	No	No	Yes	No	No	Yes	No	No	No	No	No	No	No	No	No	No	No
Suomen Talotiedot Oy	Early Stage	http://www.talotiedot.fi	Finland	Helsinki	2015	Communications & media Enterprise software	Going to market	Online service for condominiums and house managers	Talotiedot improves communication between condominiums and condominium apartment owners/inhabitants. All condominium documents are safe in one place and available 24/7. It is easy and fast way to create and share information. Used as a housing service book, it helps to save the maintenance costs.	Juho Leikas - Marketing and sales, entrepreneur, MBA Sampo Pihl - Developer & sales, BBA Mikko Pullinen - Softare developer, partner ,University of Applied Sciences Lahti Juhani Hodju - ICT and Project Management M.Sc. (Econ.) Mika Viljakainen - Mobile Applications, Web-pages, entrepreneur	We are helping condominiums to be more independent and follow the law. It is easy way to share information by themselves when house manager is not capable to do it proberly. We can also help house manager to handle several condominiums with less time and improve the current way of communication.	Small and mid-size condominius and house manager companies. There are 80 000 condominiums in Finland and 600 000 condominium apartment owners are interested to reduce or be better aware their housing maintenance costs. Among of 700 house manager companies are potential customers as well.	http://goose.fi/ http://taloset.fi/ http://www.omataloyhtio.fi/ Our approach has a different angle. It is simple to read, save, share, print and create information. As a main result, condominium keep their documents safe , better organized and available all person interested.	Starting from scratch may 2014. We got our beta working 4/2015. So far no paying customers, just pilot cases and further development. We have close relation to Kiinteistöliitto. They have helped us in planning and knowledge. Co-operation continues and we are confident it will help us in marketing.	Continue co-operation with Kiinteistöliitto and develope service book together with them. To get either investment or marketing support from their side. We are working now with marketing research to investigate other potential usage and users. We are ready to start wider marketing spring 2016!	Yes	No	No	Yes	No	No	No	No	Yes	No	No	No	Yes	No	No	No	No	No	No	Yes	No	No	No	No	No	Yes	No	No	No	No	No	No	No	No
HealthOperator Ltd	Early Stage	http://www.healthoperator.com	Finland	Helsinki	2014	Health & wellbeing Industrial internet & IoT	Going to market	Preventive remote health monitoring services to health & social care market	HeathOperator is bringing radically new business model - industrial internet operations and cost efficient health monitoring services - to health and social care sectors. We integrate health technology into well designed services.	Founder, COB Riitta Tiuraniemi; Partner, COO Jani Tikkanen; Co-founder, CTO Soili Haapala; Co-founder, CFO Terhi Pellinen; Partner, CMO Ulla Koivula	OMAseniori is our first commercial solution. It is a sensor based self-learning solution using smart analytics prediction engine. It will give seniors possibility to live longer alone at home and caregivers a secured mean to keep track on a loved one.	In ten years size of predictive health monitoring service market is 500 M€ in Finland and will grow up to the level of 1,5 MRD€. Respectively in Europe market sizes will be 50 MRD€ and 150 MRD€. We start our market entry in Finland in senior segment and continue quickly to neighboring markets.	Existing players are mainly healthcare specialists or experts in a small technical niche e.g. sensor technology companies or wellness app developers. There is no other global player with a collaborative, operator based business model like ours.	We have just launched our first service.	Revenue forecasts based on existing business plan: 2015 0,1 M€ 2016 1,5 M€ 2017 10 M€ 2018 20 M€	Yes	Yes	No	No	No	No	No	No	No	No	Yes	No	Yes	No	No	No	No	No	No	No	No	No	No	No	No	No	No	No	No	Yes	Yes	No	No	No
Kineso Oy	Early Stage	http://www.kineso.fi	Finland	Tampere	2015	Health & wellbeing Mobile	Going to market	3DFysio Exercise Visualised, a new way to look at 3D animations to exercise.	Kineso Oy is an innovative technology-oriented company developing 3DFysio - Exercise Visualised - A mobile app for physiotherapists and their patients, a new way to look at 3D animations to exercise from home.	Marion Boberg PhD, Directing Manager, Senior UX researcherPiia Tarnanen, Physiotherapist,Master of Health SciencesRiikka Panu, MS Technology, Software engineerMikko Muhonen, Software Architect Henri Lunnikivi, Software developerHeidi Mäenpää, Artistic Director, Graphic Designer	3DFysio - mobile app to communicate clear visual and animated instructions.- For the physiotherapist it provides an easy way to browse, select and edit a list of carefully selected movements. - For the patient it provides an easy way to browse personal home exercise treatment in 3D and 360'.	the potential market size we currently are focusing on are such as: Finland (population 5M - 15 000 physiotherapists (PT))Sweden (population 10M - 15 000 PT)France (population 65M - 75 000 PT)UK (population 62,3M - 49 381 PT)	Physiotools; Pacpacs; TrackActive; Physiotec; Videorehabsolution. Although some features appear to be the same, there are considerable differences, rendering of the 3D animation and end-user utilization. We believe our application gives greater flexibility to the end-user.	0	0	Yes	Yes	No	No	No	No	No	No	No	No	Yes	Yes	No	No	Yes	No	No	No	No	No	No	No	No	No	No	No	No	No	No	Yes	No	No	No	Yes
Oviku Oy	Early Stage	http://www.oviku.com	Finland	Helsinki	2013	Manufacturing tech & materials	Going to market	Oviku Ltd offers unique added security for locking interior and exterior doors.	Oviku Ltd offers unique and patented locking solutions for homes and public spaces. Safety, comfort and design are the cornerstones of our product development. Our story is just beginning and our mission is to improve your home safety.	CEO, mr Tomi Ek: Founder, MBA, Inventor -Strong sales and marketing experience, international relations VC, mr Miika Mansikkamaa: Inventor and serial entrepreneur, BA -Senior business advisor at Foundation for Finnish Inventions, Founder of Magisso Ltd	Oviku patented locking solutions increases the safety of already existing lock bodies, locks, outdoor and inner doors. Scalable globally into most models of locks and brands. Researched, proven.	Globally but especially US market where is	August Smart Lock, Goji, Kwikset, Lockitron Bolt. Oviku has several patents and patent pending solution which increases the safety of already existing lock bodies, locks, outdoor and inner doors. Our solutions makes existing locks unpickable and they are compatible for all major standards.	Our first product is ready for market in November 2015.	Market launch for first product november 2015. Second product is ready for US market at end of 2016 and smart lock version is ready early 2017. Turnover market 10milj.usd end of 2017.	Yes	Yes	Yes	No	No	No	No	No	No	No	No	Yes	Yes	Yes	No	No	No	No	No	No	No	No	No	No	No	No	No	No	No	No	No	Yes	No	No
Pluspower	Early Stage	http://www.pgen.pluspower.ru/en	Russian Federation	Moscow	2015	Energy Cleantech	Going to market	We are specializing in power electronics and energy efficiency solutions.	We are Russian team of dedicated engineers oriented towards the cutting edge power electronics and innovative energy efficiency solutions. We have developed lithium-ion batteries, which are suitable for any existing industrial equipment, and a portable power generator 5 kW with energy storage system	Mikhail Kovalenko - experienced engineer in power electronics, energy, power generations, energy storage. Marina Buzina - business development manager.	Lithium-ion batteries suitable for any existing industrial equipment, and a portable power generator 5 kW with energy storage system (li-ion battery on board).	Li-ion batteries: industrial sector, mining, construction Generator 5 kW: all low electrified regions with no access to the grid (Sub-Saharan Africa, Asia, India etc.)	Our competitors are produces of lead-acid batteries (5 times less efficient) and classic generators (consume more than 20 time more fuel). Our competitive advantage - price, our products are more efficient and offered at the same price.	Performed R&D, received patents, completed prototypes design and fully ready for serial production.	Performed full complex of R&D - from scratch to a real prototype production.	No	Yes	No	Yes	No	No	No	No	No	No	No	No	No	No	Yes	No	No	No	Yes	No	No	No	No	No	Yes	No	No	No	No	No	No	No	No	No
RSVP.dk IVS	Early Stage	https://www.rsvp.dk	Denmark	Copenhagen	2014	E-commerce & online marketplaces Food & nutrition	Going to market	Market network for popup restaurants.	RSVP is the first integrated platform for the biggest innovation to ever hit the dining scene; pop-up restaurants. RSVP solves considerable pains for both sides of the market by allowing organizers to plan, sell and measure events and guests to discover and share the experiences they crave.	Tiffany J. Ng, founder of Silver.Spoon, a gastronomic experience agency and frontrunner in expanding the pop-up dining industry. Martin Lund, experienced and passionate entrepreneur and full stack programmer. Rita Ho; foodie and former UX Designer at Google.	RSVP gives popup organizers an integrated platform to plan, market, sell and measure their events, reducing the current heavy administrative burden involving many fragmented and sub-optimal tools. Guests get a single, credible and easy to use source for discovering and booking popups.	Popups are the strongest innovation in dining experiences ever. Currently an $8B market, growing up to 83% Y/Y driven by massive popularity with both organizers and guests, despite significant friction and pains.	Traditional ticketing and booking sites, Eventbrite, Biletto, etc. Pop-up restaurants have many unique requirements that go unfulfilled by traditional providers, forcing organizers to use many fragmented tools. Similarly to the short-term rental market before Airbnb.	Funnel steps go: Events Listed -> Conversions to booked events -> Tickets sold -> Users retained. We've taken bookings in each key market, and have v2 of our site ready for deployment, ready for scaling.	24 target cities / 180 weekly events / $150.000 MRR	Yes	Yes	No	No	No	No	No	No	No	No	No	Yes	No	No	No	No	No	No	No	No	No	No	Yes	No	No	No	No	Yes	No	No	No	No	No	No
Meshcrafts	Early Stage	http://www.meshcrafts.com	Norway	Ås	2013	Cleantech Transport & automotive	Going to market	Eletrical vehical consumer platform (trading energy, routing etc)	Meshcrafts is a service provider targeting the B2B market for charging and payment of charging for electrical vehicles (EV). making a platform enabling EV-drivers and to interact in real-time and solving their needs.	- Mr Frengstad the founder and CEO Engineer - Mr Weiseth co-founder analytics - Mr Krog Nilsen Financial Manager. - Mr Kvålsgard system architect - Mr. Rognerud Back end dev - Mr. Gasmann front end developer - Mr. Myhre Mangment, sales and PR	Meshcrafts is a solution provider for Smart City, Smart Transportation and E-mobility. By combining innovative, cutting-edge software and hardware solutions, Meshcrafts is solving the pains and hassles of modern transportation.	Meshcrafts are targeting the charging (software) market, with focus on small to medium effect 2-22 kWh. Apartment buildings, Enterprise, home market and governmental market. Targeting Norway first, for verification and sandboxing. Norwegian Electrical Vehicle market has grown with 100-125 % each yma	Hubject, fortum as the two biggest competitors. Meshcrafts unique user design, business model and market fit is our biggest advantage. Meshcrafts are targeting the single charging stations in an open network instead of building closed system for single companies.	Meshcrafts have been developing a product (hardware) so we have just burned cash, but received apx 105 k € in grants from Innovation Norway, and are about to release into the market. We have a beta app out there who have 150 dedicated test users	we are releasing the app on iOS and Android, have a bizspark + partnership with Microsoft and are rolling out the hardware in February. Our team have increased with a focus on sales and business development	Yes	Yes	Yes	Yes	Yes	No	No	No	No	No	No	Yes	No	No	No	No	No	No	Yes	No	No	No	No	No	No	No	No	No	No	No	No	No	No	No
iStaging Corp.	Normal	http://www.iStaging.co	Virgin Islands, British	Tortola	2015	E-commerce & online marketplaces Mobile	Going to market	iStaging is a mobile application helping people visualize their future home.	iStaging is a mobile application combining augmented reality and virtual reality to help people find their dream home and furnish it with the perfect decoration. We provide services to construction companies, real estate agencies, furniture manufacturers and interior designers.	Founded by the lifetime entrepreneur Johnny Lee, iStaging is backed by a world-class team of engineers and designers, including CTO Felix Chang, PhD graduate from the best university in Taiwan, and Director of Design Sophia Wang, experienced interior designer.	iStaging is an app tailored for all the businesses playing a role in the home and furniture purchasing process. We creates connection with other businesses and helps them sell more and to new clients. iStaging is also a mobile platform for consumers helping them to find and decorate their home.	We provide services to real estate developers, real estate agencies, furniture makers and interior designers. Our end user app can be used by anyone in search for a home or furniture. Geographically we target every market where people are willing to spend money to purchase a home or furniture.	We have a few competitors providing augmented reality apps for furniture or virtual reality apps for real estate, while we combine these two technologies. Our technology tends to be more powerful and our interface more user-friendly than most of them.	iStaging was launched in September 2014. We won 2 major awards and were chosen for the 2015 Orange Fab Asia Accelerator Program. We have sales channels on 4 continents and cooperate with top furniture and real estate companies.	Firstly, we aim to expand our business sales channels to more than 30 countries in the next 18 months. Our goal is to gather as much content as we can from businesses. We will then launch our end user version available for everyone in 2016 Q1, and focus on growing its user base.	Yes	Yes	No	No	Yes	No	No	No	No	Yes	No	Yes	No	No	No	No	No	No	No	No	No	No	Yes	No	No	No	No	No	No	No	No	No	No	Yes
Masar	Early Stage	http://masar.io	Netherlands	Amsterdam	2015	Energy	Going to market	The sun continent powered by the sun	Masar is Africa’s first super-utility (distributed solar power and services network). The smart energy company partners with private property-owners to deploy mobile solar containers close to major cities, where power consumption is high, and provides smart energy solutions to prevent blackouts.	Mohamed El-Fatatry CEO, Serial entrepreneur with over 10 years of experience, Recipient of the Internationalization Award of the President of Finland.Tuomas Tahvanainen CFO, Chairman & Partner at Leppavaaran Laskentä Accounting Firm, Experience in financing and growing multiple startups.	Masar's solar installations are completely mobile (shipping container shaped) and are up-and-running within 60 minutes of dropping the container on the installation site. The technology was developed in the German military and this is the first time it is deployed at a large scale for civilian uses.	The Egyptian government pre-approved 300MW of small-medium scale solar power plants with an attractive 25-year PPA of 0.12EUR/KWh (similar to the German Feed-in-Tariff). Masar is the best positioned player to dominate this market within the next 3-5 years.	Local service providers can install/maintain installations but lack the access to a large number of property-owners and/or international investors.International solar financing players like SunFunder.com lack local market access.	The company successfully completed a prototype installation in Cairo.	The company is currently raising funding for the first 10 Masar Boxes, which once deployed would bring the company's total output to 500KW. During the following year, the company will deploy an additional 90 boxes to raise the total output to 5MW. The goal is a total output of 50MW within 5 years.	No	No	Yes	Yes	No	No	No	No	No	No	No	Yes	No	No	No	No	No	No	No	No	No	No	No	No	Yes	No	No	No	No	No	No	No	No	No
Rational Network ehf	Normal	http://rational-network.com	Iceland	Egilsstadir	2004	Industrial internet & IoT	Going to market	HW & SW for IoT, enabling device data communication over existing power lines.	RN has developed web solution for Building Energy Management. It is installed in hundreds of buildings in Norway and EU. We focus on using Narrow-band Power Line Communication (NPLC), for device communication. Now developing hardware and software for the IoT, based on long term experience.	Throstur Jonsson: MSc Electrical & SW Engineer. 30 years experience including BEMs and business operation. Paul Humphreys: Electronics Design, located in the UK. More than 30 years experience (cust.: Harley Davidson, RAF, etc.). Large customer network. Danjal S Adlerssen: Software Engineer.	Product code name; DinGo involves development of open, standard base hardware and software for monitoring and controlling distributed devices (IoT). It emphasizes data communication over existing power-lines in buildings and streets, where other methods are impossible or too expensive.	The IoT market is expected to grow exponentially in coming years. Referring to Gartner research, the IoT installation base will grow from 5 billion units in '13 to 26 billion units by '20. The IoT maker market also grows rapidly Examle: Raspberry Pi has been sold in over 5 million units today.	Very many startups are rushing the IoT market today. Big players like IBM and Google are regarded as our partners. Our competitive advantage is robust NPLC, and portable open standard based high level software. We offer the IoT maker market a high level solution, but not bare metal as f.ex. RPi.	Key metrics last 12 months is to finish first product development in Q1 2016. We are currently 2-3 months behind schedule. Final DinGo computer hardware prototypes are ready. Most of the software is also developed. NPLC plugin modules are now beeing prototyped.	The DinGo products have been introduced to some key partners/customers in EU with positive response. Marketing will start in Q1 2016 and sale in Q2 2016. DinGo web site: Q1 2016. Marketing/Sales person will be hired in Q1 2016. Sale til Q1 2017 of DinGo products is estimated to be 400k$.	Yes	Yes	Yes	No	Yes	No	No	No	Yes	No	Yes	No	No	No	No	No	No	No	No	No	No	No	No	No	No	No	No	No	No	No	Yes	No	No	No
Polarsol Oy	Normal	http://www.polarsol.com	Finland	Joensuu	2009	Energy	Going to market	A disruptive heat management solution that reshapes the industry landscape	It’s time to shake up the industry. Polarsol has launched a solution that enables solar thermal to be used as a cost-effective standalone heating option as north as Finland. With Polarsol’s solution clean energy finally becomes the real economical alternative without any public incentives!	Anton Serbin, Founder, CEO, 38 y, PhD, inventor, young scientist of the year 2006 in Russia Ilkka Kakko, Director, Business development, 60 y, DI, Facility Manager of the year 2009 in Finland Erik Raita, Director, Marketing and Communications, 43 y, PhD, serial enterpreneur with diverse background	A hybrid system developed by Polarsol utilizes a proprietary patented heat exchanger in various system components and in a very unique way combines solar thermal with air heat pump, waste heat recuperation and long-term heat storage properties. The same system may also be used for cooling.	Along with the increasing demand for renewable energy one of the most critical challenges globally is the independence from fossil energy sources and external supply. Polarsol’s solutions are directly addressing this challenge by providing means for local cost-effective generation of clean energy.	The same core element - a proprietary heat exchanger - is used in different components of the hybrid heating system. This leads to much lower investments, higher durability, shorter payback time, lower operational costs, etc. Competitors can be found mainly among geothermal systems and heat pumps.	So far our main metric is the number and geography of pilot installations. During the last 12 months everal new systems have been delivered in Finland, Estonia and Ukraine.	During next 18 months we plan to become a recognized player on the Finnish market and start marketing in Scandinavia and selected European countries like Germany and Italy. In Finland we plan to implement several industrial scale objects in addition to small private houses.	Yes	Yes	No	Yes	No	No	No	No	No	No	No	No	Yes	No	No	No	No	No	No	No	No	No	No	No	Yes	No	No	No	No	No	No	No	No	No
Aplicaciones Renovables Integradas SL	Normal	http://www.ari-solar.es/	Spain	Sevilla	2008	Energy Cleantech	Going to market	Development engineering and measure solar resources company	The Ariostato represents a new approach in heliostat design. It includes an innovative target focusing strategy and reflection sensors with a closed loop control system, in addition to being completely autonomous.	Finance: Emilio Murcia Pacheco: Aeronautical Engineer, Finance Master Business development: Julián López Garrido: Aeronautical Engineer Operaciones: Pedro Macías Ortiz: Civil Engineer, MBA CEO: Pedro José Murcia Pacheco: Aeronautical Engineer, MBA, Advance Company Management Studies Master	We offer a new heliostat field design based on our own technology, that allows to reduce manufacturing, installation, operation and maintenance costs of the central tower CSP installations. Along with Ariostato, ARI Solar has developed its own software for optimizing heliostat fields.	Customers: CSP central tower: a few companies dominate the market, Huge companies dedicated to CSP installations promotion, construction, O&M, Some of which have their own technology. Potential market: 20-30 potential companies including the following: ENEL, EDF, Areva, Acwa, PGE, GDF Suez, etc…	Competitors: Solar Tower Systems GmbH, Lite Solar Corporation, Airlight Energy, Heliovis y Aora Solar. Competition dominates the sector with large firms with years of experience. Competition is not focus and frame wolrdwid. Innovation degree is high. Every customer has its own specific requirements.	The qualities which distinguish our new heliostat model from the conventional heliostat have a direct bearing on the key areas for improvement of this clean renewable energy generation technology. In the last year, It was created a prototype heliostat and started testing it.	ARI Solar will put its flagship, the Ariostato, in one CSP project which going to give the necessary support to understand that ARI Solar can help to improve the energetic sector. In long term, ARI Solar has in mind launches other solutions that complete its portfolio and allow for offer the best.	Yes	No	No	Yes	No	No	No	No	No	No	No	No	No	Yes	No	No	No	No	Yes	No	No	No	No	No	Yes	No	No	No	No	No	No	No	No	No
iDTEQ	Normal	http://www.idteq.com	Norway	Asker	2006	Industrial internet & IoT Transport & automotive	Going to market	Develop unique technology, and manufacturing products for Security market.	IDTEQ provides a leading technology for secure and reliable alarm detection in remote and noisy environments. The IDTEQ incident detection technology samples and analyses sound. The Technology may be used in most all Security segments both at fixed premises and movable objects integrated to IoT.	Tor Sønsterød (founder), entrepreneur, worked with sound based alarm-systems since 1998 and is behind 3 patents registered to the Company Petter Taugbøl: an MBA and B.eng. He has 19 years of experience within business development from the telecom and banking industries (strategic and operational).	One of our products are for the road transport and how to fight criminal activities in the sector. iDTEQ has the technology to better protect the personnel, trucks/goods. Conventional alarm systems are not made to handle the specific treats of fuel theft or cargo theft. iDTEQ solves the challenge.	Our addressable market is the Security market. The growth of the industry is stabile and the opportunity for new technology, solving problems, are there. As an example and why we focus on road transportation segment; on yearly basis, the costs related to Cargo theft exceeds € 8 billion in Europe.	Competitors: Truck secure, Security by design, Verizon fleet management, TrailerMatics. iDTEQ has a unique technology; recognition of sound patterns. The technology, combined with other sensors, provides comprehensive information to a Central which provide selected information to any receiver, IoT.	The company is in a start-up phase and have not had significant sale during 2015. The focus has been on optimization of the product, remove any flaws, improvements and make it ready for heavy market launch. This is now completed and the company need funding for Go to Market.	We will work particularly against the transport industry. The strategy is, together with partners, run field tests and approach new partners and distributors throughout Europe. Approach manufacturers of Trucks, approach carriers, truck owners and transportation associations for push and pull.	Yes	No	No	No	No	No	No	No	No	No	No	Yes	No	No	Yes	No	No	No	No	No	No	No	No	No	No	No	No	No	No	No	Yes	No	No	No
IoLiving	Early Stage	http://www.ioliving.com	Finland	Oulu	2013	Industrial internet & IoT	Going to market	Unique IoT service that does not need any dedicated router nor base station.	Team wearable, healthy room air, food quality control, moisture test of concrete floor. These IoT applications exists already on top of IoLiving service. Easy to use. Cheapest possible way to connect things to net. End-to-end IPR: embedded SW, mobile gateway, cloud service.	T.Dr. Matti Verkasalo, experienced business and technology manager, executive manager in Nokia and Poalr Electro. T.Dr. Tapio Frantti, world class radio technology and data security expert. Hemmi Piirainen, Exceutive logistics and operations executive, worked previously with Nokia.	Three IoT cloud services: team wearable, food quality, healthy room air. Five IoT devices measuring, humidity, temperature, CO2, moisture, motion.	Europe.	No direct competitors. "Pen and paper" in restaurants. Big soprts companies in the team wearable business. Our competitive advantages are easy to use, low pruct prices and flexibility	100% (turn-over is not high, yet)	500%	Yes	No	No	No	No	No	No	No	No	No	No	No	Yes	No	No	No	No	No	No	No	No	No	No	No	No	No	No	No	No	No	Yes	No	No	No
Greenely	Early Stage	http://www.greenely.com	Sweden	Stockholm	2014	Cleantech Energy	Going to market	We gamify households energy usage to engage and help them achieve energy savings	We have developed and analytical tool that visualizes and gamifes household energy consumption. We sell our solution mainly to energy retailers, to increase their customer loyalty, decrease churn, and enabling them to offer a more premium experience to their customers in a very competitive market.	Tanmoy Bari - Co-Founder and CEO, Mohammed Al Abassi, Co-Founder and Project Manager Fredrik Hagblom, Co-Founder and Product Manager Matthias Bauhofer, CTO Filotas Siskos, Lead back-end developer Anton Holmberg, Lead front-end developer Erling Gustafsson, Senior Business developer	We offer an analytical tool that utilizes gamification as a mean to engage households in their energy usage, increase their awareness of it and guide them toward energy savings. The analysis is presented in our mobile application and does not require any hardware installation, making it very easy.	Our solutions utilizes data from smart meters and the addressable market is therefore currently in the Nordic countries, parts of Europe (Italy, Spain UK, Netherlands) and the US, markets that have an already established or rapidly growing infrastructure of smart electrical meters.	Our main competitors in Europe are companies such as Eliq in Sweden and the energy retailers own solutions which all require hardware, making it very complicated and costly for the end users. There are also American competitors such as Opower but we focus much more on gamification.	-Grown from 3 to 6 full time employees -Finished pilot project with Mälarenergi, 6,3 % savings -Secured a 4,3 MSEK grant from the Swedish Energy Agency -Signed two large business customers (SBAB and Umeå energi) -Entered collaboration with Stanford University and SMUD for an american pilot	-Hiring another back-end developer and a Sales Manager -Signing another 10-15 customers in Sweden -Signing 1-3 customers in Finland or Norway -Securing an investment of 600 kUSD -Launching pilot project in California with Stanford University and SMUD	Yes	Yes	No	Yes	Yes	No	No	No	No	Yes	No	No	No	No	No	No	No	No	Yes	No	No	No	No	No	Yes	No	No	No	No	No	No	No	No	No
Blazt	Early Stage	http://www.blazt.co	United Kingdom	Manchester	2015	Social media Mobile	Going to market	Location based user generated content sharing and social networking.	A platform to Discover, Share & Trend in your locality, revive the community, get a sense of awareness of your surrounding, get people involved in your exciting moments, events and opportunities. Be the trend or become part of one to experience life first hand where ever you maybe.	Amim Shafiq – Founder & CEO, Umar Mirza - COO & CFO, Salman Aslam - Technical Partner - Clustox https://pk.linkedin.com/in/msalmanaslamMuhammad Taqweem Sultan. - Techncial Parnter - Clustox https://pk.linkedin.com/pub/muhammad-taqweem-sultan/18/76a/447	Share your thoughts, moments, news, happenings, pictures, videos, doodles with people in your location. Anonymity (optional). Self destructing messages, NO time limit. Location based trends. Tag a friend and Blazt to all of THEIR contacts. Group chat. Screen Shots result in a 3 day suspension.	Users watch exciting moments from around the world on their phones, but often tend to miss out on fun and trends right at their doorstep, which they could have experienced. Blazt can plug that gap. Local businesses can have a voice, local trends can get noticed & social interaction can increase.	Although there are platforms (Yik Yak, Whisper, Snap Chat) that touch upon some of the same issues. Our uniqueness is achieved through the way we allow users to generate & share content it in their vicinity & use of trend integration within location while maintaining anonymity if the user wishes.	The key metrics we use are number of downloads vs. active users. However, Blazt launched in mid Aug so we are still trying to develop traction which would lead to much better metric analysis.	We have developed a multi-dimensional marketing strategy that focuses on projecting Blazt through social media platforms, targeting universities, schools and colleges at local and international level, and making use of global start-up forums such as Slush.	No	Yes	No	No	No	No	No	Yes	No	No	No	No	No	No	Yes	No	No	No	No	No	No	No	No	No	No	No	No	No	No	No	No	No	No	Yes
OWLR Ltd	Normal	http://www.owlr.com	United Kingdom	London	2013	Industrial internet & IoT Communications & media	Going to market	We Make it Easy to See Things!	OWLR is centered around video and mobile - creating solutions for intelligent personal awareness - in the home, in the workplace and in the world. As IP cameras become more and more powerful while prices keep falling, OWLR offers users control and collaboration with the ease of great design.	Sanford Dickert - frequent CTO and CPO for NY, LDN & SV startups; Purdue & Stanford; Chris Jenkins - Lead Android, fmr Mobile Lead for Yoyo, LoveFlutter; BSc Hons Alessandro Filippi - UI & Design Lead, fmr Design Lead at Orange Labs, Frog, Artifact Oles Karchevskyy - Lead iOS Dev, glu mobile	Mobile Camera Controller and Live Camera Feeds from around the world. Users are frustrated with poorly designed mobile apps for this market - which is about trust and security, and OWLR is focusing on great design and solid software development. OWLR TV offers access to cams around the world.	Estimated $57B IP Camera market as of 2020. Even if only 10% is for residential uses, $5B market possible.	A number of third party, single developer apps and the manufacturers themselves. In addition other competitors like Cammy and EverCam can play in the space if they choose.	Product launch was in May and have had over 36K downloads since that launch. Engagement is increasing with time on app growing	Unsure at the moment.	No	Yes	No	No	No	No	No	Yes	Yes	No	No	No	Yes	No	No	No	No	No	No	Yes	No	No	No	No	No	No	No	No	No	No	Yes	No	No	No
Indoor.Ninja	Early Stage	http://indoor.ninja	Estonia	Tallinn	2014	Industrial internet & IoT	Going to market	Smartphone based visitor identification for allowing automated elevator usage.	Indoor.Ninja has developed a system that connects the office occupant conveniently to the guest in the lobby. The request is made via tablet application in the public area and the occupant can send an elevator via his smartphone to bring the guest to the right floor or delicately reject the visitor.	Madis Laas - Co-founder, Communication Peep Paum - Co-founder, CTO Annika Räim - CEO, Administration Henrik Eeltee -. R&D, Innovation&Design expert Edvin Parisalu - Finance	A smartphone based system that connects the office occupant conveniently to the guest in the lobby. The request is made via tablet application in the public area and the occupant can send an elevator via his smartphone to bring the guest to the right floor or delicately reject the visitor.	Global. Starting with Scandinavia as a test market.	Market creator. No products with same functionalities as KONE IoT platform is unique. The product can substitute/complement other systems in access control field. It might compete indirectly with a variety of products: the receptionist service, access card systems, biometrical identification.	Start December 2014. 2015: I q prototype ready. II q patent application submitted, product test premises agreed. III Cooperation and sales agreement with Kone. IV q minimum viable product ready; first test customers.	2016 early revenues, first sales in Scandinavia and Northern Europe. Preparing for the global roadshow with KONE Corporation (July-October). Product launch and start of global sales (Sept-Dec.)	Yes	No	No	No	Yes	Yes	No	No	No	No	No	No	Yes	No	No	No	No	No	No	No	No	No	No	No	No	No	No	No	No	No	Yes	No	No	No
STIMERGY	Normal	http://www.stimergy.com	France	PARIS	2015	Cleantech	Going to market	Stimergy provides an green digital infrastructure for high-availability hosting	Stimergy installs server rooms in building, heating them by valorising the heat generated by servers. We hence create a distributed datacenter that can host web applications with very high availability at a competitive price. We are building the 3rd digital indsutry revolution!	Christophe PERRON - Founder & CEO Sabine DESNAULT - Marketing & Sales Director Benjamin CLAUDEL - Project manager Louise VIALARD - Project manager & sales	We propose IT industry companies a digital infrastructure that lies on a distributed server room park. This way, they benefit from a high-availability, local and green infrastructure solution at very competitive costs.	The total adressable market is a 4B€ market. Our market opportunity is more about 800k€.	Our competitors are companies that are proposing green and local IT infrastructure solutions (Nerdalize, Qaront Computing, Nerdalize...). Our main advantages are: - our international partners - our qualified solution - our coaching environment - our profitable business model	Our keys metrics are: - the number of server room installations (2 by now to 5 by the end of the year) - the number of hosting services sold (1 by now to 5 by 6 months) - the team size and its commercial power (from 2 beginning 2015 to 4 right now and 9 in 6 months)	We forecast a growth of our turnover from 50k to 700k$ by 18 months	Yes	No	No	Yes	Yes	No	No	No	No	No	No	No	No	No	Yes	No	No	No	Yes	No	No	No	No	No	No	No	No	No	No	No	No	No	No	No
Mobedig Ltd	Early Stage	http://www.mobedig.com	Finland	Helsinki	2015	Music & entertainment Communications & media	Going to market	We amplify and extend experiences of location-based entertainment facilities.	Mobedig's vision is becoming world's leading location-based entertainment operator with no own physical facilities. Our platform offers location-based entertainment facilities a platform, tools and inspiration to lead, deliver and measure personalised visitor experiences and create extra revenues.	Jannika Joutsenniemi - Co-founder, CEO | Vilma Gustafsson - Co-founder, Chief Storyteller | Samuli Tivinen - Partner, Creative Technologist | Sampsa Saarela - Partner, Tech Team Lead	24hEXPERIENCE offers a platform, tools and inspiration for delivering extraordinary, personalised experiences at existing entertainment facilities. For visitors, 24hEXPERIENCE offers a chance to design their own experiences at an attraction with their mobile devices.	Global, but we are currently focusing on Nordic, Europe and Asia.	Existing services and products at entertainment facilities, facility specific mobile applications.	Company was founded in the spring 2015. The Proof of Concept was launched in July 2015 at SEA LIFE Helsinki, the biggest aquarium in Finland and a part of Merlin Entertainments.	The objective is to get 2-5 new location partners (entertainment facilities) together with which we can develop further our services, business model and processes for scaling the business globally.	Yes	Yes	No	No	No	Yes	No	Yes	No	No	No	No	Yes	No	No	No	No	No	No	Yes	No	No	No	No	No	No	No	No	No	No	No	No	No	No
Ingenious	Early Stage	http://ingenious.io/en	Turkey	Istanbul	2015	Consumer electronics	Going to market	Ingenious is an innovative, plug&play smart home product.	Without any need for professional help, Ingenious can be set up at home in just 15 minutes and is ready to work. All you need is a wireless Internet connection and a smart phone or tablet. The innovative user experience and our learning algorithm make your life easier and helps you to save money.	Burak Adali(32): Industrial Engineer, Business Guy Atilla Bilgic(39): 15+ years of R&D experience, Tech Guy Baris Ari(30): The designer, also coder	Ingenious is specially developed for european users, living in small apartments with concrete walls. Beside designing one of the best user experiences ever designed for a smart home product, we also developed an algorithm to learn users habits/paterns to plan the upcoming events and save energy.	With over 60% CAGR, the connected devices market is growing faster than smart phone and tablet market. It is the next big thing like the PC, web or Social Media.	Most of the companies are focussed on the US market and designing product for this market. But often these products like room thermostats or door locks aren't suitable for european market. Actually Europe is also a huge market with over 65 M Households with broadband internet access.	We received over 600 pre-order applications only from Turkey. We also won several competitions like Intel Innovation Challenge and were one of the ten startups selected for the Cannes Lions Innovation Festival.	It's a B2C and physical product. We need to create channels and reach innovators, opinion leaders to reach out our target audience, the young professionals. According to our existing traction, we believe we can sell over 2000 units only in Turkey and over 10.000 units in Europe for our first year.	No	Yes	No	No	No	No	No	Yes	No	No	No	No	Yes	No	No	No	No	No	No	No	Yes	No	No	No	No	No	No	No	No	No	No	No	No	No
Soil Scout	Early Stage	http://www.soilscout.com/	Finland	Helsinki	2015	Industrial internet & IoT Cleantech	Going to market	Critical insight into below ground conditions, wirelessly, for up to 20 years	Soil Scout provides critical wireless insight below ground, transmitting environmental data through soil, clay, ice, concrete and more from up to 4 metres, maintenance free for up to 20 years. By providing easy insight, customers can significantly improve resource efficiency, and reduce pollution.	Jonathan Skelly (CEO) - 20+ years in BD, Product Marketing & GTM; Johannes Tiusanen (CTO) - PhD Soil Scientist & 19th generation farmer; Jussi Sirkiä (Head of R&D) - Expert in multi-discipline electronics design and manufacturing; Ilari Koskelo (CFO) - Successful entrepreneur 25+ years	Soil Scout is the first company transmitting from more than a few cm below ground. It provides easy, continuous insight to conditions providing ability to decrease water & energy usage by 20%, reduce pollution and early warning to potential problems. Sectors include Agriculture, Utilities & Sports	Fresh food production is a $2.2tn business in 2015, with approx. 20% being artificially irrigated. Markets for wireless agricultural sensors $3bn in 2016. Current sales and / or leads in Finland, Denmark, India, Israel, Brazil, USA, Australia, Netherlands, Germany and South Africa	Large number of sensor providers, but majority rely on cables &/or obtrusive probes. Soil Scout measures & transmits wirelessly. We are complementary to multiple systems by enable the last few metres below ground far more efficiently.	Commercial pilots & commercial-preparation activities primarily. Trademark approved, European CE approved & commercial production has begun. International patents applications well progressed. Commercial sales started April 2015, and tripled total 2014 sales in first month	Initial focus is direct and agent-led B2B sales to generate cashflow, productise properly, and prove solution for technology licensing opportunities. Consumer version being evaluated to provide faster growth. Projected 2016 revenue of €2M	Yes	No	No	Yes	Yes	No	No	No	No	No	No	Yes	No	No	No	No	No	No	Yes	No	No	No	No	No	No	No	No	No	No	No	Yes	No	No	No
Hauser	Early Stage	http://www.gethauser.com	Finland	Helsinki	2015	Social media Communications & media	Going to market	We make communication easy	Hauser is the worlds first platform for housing related communication that is build from the residents perspective.	Mikko Riikkinen J-P Kevätsalo Quang Pham	Hauser is a easy communication tool for residents. Main features are - FEED - discussion within the community - INBOX - direct messages with neighbours - CALENDAR - booking spaces within the house - GROUPS - sharing economy possibilities	Europe, starting from Finland and expanding to Germany second. There are around 2 million apartment houses in Europe but we consider accessible market share to be around 50.000 houses. With our subscription and estimated lifetime value we expect a revenue of 87 million euros within the next 5 years.	There are solutions in the market that are trying to solve the same problem, however they are always build from the property manager / owner perspective. Our solution builds fully on the basis of residents and Peer-2-peer communication.	We follow the number of houses joined and downloads by residents as our KPIs. By the end of 2015 we expect to have 300 houses in and 5000 downloads.	We are estimating to have 10.000 houses and 100.000 downloads in the end of 2016.	Yes	Yes	No	No	Yes	No	No	No	Yes	No	No	No	Yes	No	No	No	No	No	No	Yes	No	No	No	No	No	No	No	No	No	No	No	No	No	No
www.panorics.com	Early Stage	http://www.ptrig.com	United States	New York	2014	Consumer electronics Virtual reality	Going to market	Panorics builds 360 video cameras for VR and other industries.	Panorics builds affordable spherical (360-degree) video cameras that enable consumers and video studios to create immersive VR content and stream it live over Internet. The company's spherical cameras can be used in multiple industries including entertainment, drones, real estate, tourism, etc.	Alex Boch, CEO. Founded 5 companies, sold 3. Ex-Rocket Internet, Morgan Stanley. Wharton MBA, Harvard ExEd, MSU JD. Alex Dmitriev, CPO. 10+ yrs of 3D, 360-degree photo/video experience. Holds 2 patents. Alex Karabutov, Chief Engineer, PhD. 8+ yrs of embedded devices programming. Holds 1 patent.	PTRig (www.ptrig.com) is a 360-degree video system developed to be used with 3 GoPros. B2B camera (pre-orders open in September-October) - spherical video camera targeted at professional users. B2C camera (launched on Indiegogo in Jan 2016) - spherical video camera for consumer use.	$50B+. Panorics has a "cross-sectoral" technology. Exponential development of VR is impossible without 360-degree video content. Thus, VR is the most obvious application of our technology. Security, drones, robotics, entertainment are by themselves huge markets which can benefit from spherical video	360cam, Ladybug, Bublcam, Immersive Media. Panorics builds cameras which provide a resolution of 3000x1500, real-time streaming capability (working on it now), cover fill sphere (360x180 degrees, no blind spots), are more efficient and cost less that competitors' products.	We have just launched the new product and have collected numerous pre-orders for the new camera.	Exponential, product sales will pick up quickly given the demand. We expect to sell tens of thousands of cameras in the next 1.5 years.	No	Yes	No	No	No	No	No	Yes	No	Yes	No	No	Yes	No	No	No	No	No	No	No	Yes	No	No	No	No	No	No	No	No	No	No	No	No	No
Cobase AB	Early Stage	http://cobase.se/	Sweden	Stockholm	2014	Analytics, big data & AI Industrial internet & IoT	Going to market	Our mission is to help build homes for people faster and cheaper.	We have a platform for construction companies and housing planners, where they could collaborate and work much faster by using digital tools. We connect field(construction site) with the office and provide data for planners and architects to help them to avoid mistakes and cut costs.	Martin Kikkas - Co-founder - Student at Hyper Island. UX/UI designer, super passionate about technology and innovation. Kaspar Kallas- Co-founder - Entrepreneur. Has a background in real estate and construction industry. Sergii Kirpal- Front end developer Max Gichka - Back end developer	Our product helps to manage every day work on companies site. We connect the field and the office on very smart way where users generate data that we can analyse and help to avoid mistakes and cut costs. By that we can make the process more efficient when it comes to building new houses.	Our target market is mid size construction companies and real estate developers. We are launching first at Sweden where the whole industry size is more than 90B.	Our competition is mostly based on US where there is some similar products that are usually limited to one platform. We have taken different perspective to differentiate the user types and based on that show relevant version of application. This makes app easy to use for everyone.	We have been working on our first product development last 5 months and we are soon to be released. (In October). We have gained huge interest in construction companies and real estate developers. Also we have support by government to have access to their agencies and databases.	We wanna release our first version and gain proper user base and become profitable. In next half year we wanna continue development by doing integrations with other software and systems. Our second year plan involves working more with city planning.	Yes	Yes	No	No	Yes	No	No	No	Yes	No	No	Yes	No	No	No	Yes	No	No	No	No	No	No	No	No	No	No	No	No	No	No	Yes	No	No	No
Thingsee Ltd.	Early Stage	http://thingsee.com	Finland	Oulu	2014	Industrial internet & IoT Consumer electronics	Going to market	Thingsee enable you to build new IoT solutions 90% faster, cheaper & easier.	Thingsee creates smart IoT tools that anyone can configure and reprogram for their own use. Thingsee One is a rugged, weatherproof device with a wide range of sensors, WIFI, BT and GPRS connectivity and 1-year battery life.	Pasi Jokine, CEO, Anu Lapola, COO Kari Kujala, Director of Sales Pasi Leipälä, Founder, Ville Ylläsjärvi, Founder, Jyrki Okkonen, Founder, Teemu Vaattovaara, Founder	Thingsee One is an IoT multitool for creating new products and services. Thingsee allows for fast prototyping as well as actual real world use cases with it's rugged design. Thingsee One makes developing new IoT solutions faster, cheaper and more affordable.	Developer platform market is growing to a +$20 billion market during the next five years. Thingsee platform allows a transfer to multiple industrial & consumer verticals with market sizes in $100's of billions.	IoT prototyping & developer tool market is full of different kinds of raw PCB-based devices. Some devices exist with designs that allow real world usage: The main advantages for Thingsee One are: weatherproof housing, built in GPRS-connectivity, extreme battery life (+1 years) and easy-to-use tools	Thingsee completed a $100k Kickstarter campaign at the end of 2014. Product development finished in July and the first batch was delivered in August. Units sold is the current main metric for Thingsee One, but the market is just starting.	Thingsee is aiming to sell 2000 units during 2015, and to grow +10x in 2016.	Yes	Yes	No	No	No	No	No	No	No	No	No	Yes	Yes	Yes	No	No	No	No	No	No	Yes	No	No	No	No	No	No	No	No	No	Yes	No	No	No
Geomiso	Early Stage	http://geomiso.com	Greece	Athens	2015	Manufacturing tech & materials Transport & automotive	Going to market	We design & analyze simultaneously engineering projects (disruptive innovation).	Our company created the pioneering software Geomiso (disruptive innovation) that fully integrates CAD/CAE industries & fills an enormous existing gap in the global market (automotive, aerospace, defense, construction, consumer products, PLM) for technical software with dual design & analysis nature.	Karakitsios Panagiotis (Co-Founder, Chairman, CEO) is a distinguished researcher, civil engineer and a successful entrepreneur. Karaiskos Georgios (Co-Founder, R&D Manager) is a distinguished programmer, civil engineer and entrepreneur. Eleni Michael is the fluid mechanics lead engineer of Geomiso.	The first worldwide fully integrated CAD/ CAE software Geomiso (disruptive innovation), as compared with competition, increases significantly the accuracy of the analysis and reduces drastically the computational cost, thereby allowing for implementing more accurate & optimized engineering projects.	Geomiso (disruptive innovation) fully integrates CAD and CAE (total global market for 2014 USD 8.7 & 2.8 billion respectively). It simulates engineering projects of highly complex geometries with a wide spectrum of applications (automotive, aerospace, defense, construction, consumer products, PLM).	The competitive advantage of Geomiso is its unique dual design & analysis nature and the potential to be disruptive & fully integrate the CAD/CAE industries. In comparison with other CAE programs, it increases significantly the accuracy of the analysis and reduces drastically the computational cost.	We conducted extensive & successful beta testing. We won four innovation & entrepreneurship awards (ideatree 2014, Angelopoulos CGIU Fellowship 2015, ibank 2015, Greece innovates 2015). We commenced negotiations with a major European car manufacturer and the largest private hospital units in Greece.	With the profit from our first version & our cooperation with a major European car manufacturer & a Private Hospital (bioengineering), we will enrich our R&D & launch new versions. We aim to find an investor in order to disrupt the existing CAD/ CAE industries & lead the new fully integrated market.	Yes	No	No	No	No	No	No	No	Yes	No	No	Yes	No	Yes	No	No	No	No	No	No	No	No	No	No	No	No	No	No	No	No	No	Yes	No	No
GDP Quadrat	Normal	http://gdpquadrat.com	Russian Federation	Moscow	2014	Manufacturing tech & materials	Going to market	Special economic zone STUPINO QUADRAT in Moscow region	The company GDP Quadrat is an industrial real estate developer and a joint Russian – German venture. Industrial district “STUPINO QUADRAT” is the new large-scale project of industrial development, located in 73 km south of Moscow. . Our competitive policy is built on the quality-based service.	Ekaterina Evdokimova, LL.M. (USA), Managing Partner, Attorney at Law (DE), Lawyer (RU) - 15 years of advisory on industrial construction and production localisation in Russia, 10-years experience as Head of Russia Desk and Partner with an international law firm. MR Group - the holding company.	Our competitive policy is built on the quality-based service. We provide not only the land plot with the required infrastructure, but also take care of the construction process, apply for the issue of building and connection permits, etc. “Investor concentrates on the business. The rest is our job!"	Producers of high-tech and electronic equipment interested in localisation of a production facility in Russia. Due to the policy of importsubstitution foreign manufacturers are in need of localisation of their production.	State industrial parks and special economic zones. We build long-term relationships, counting on decades of collaboration. Because the owner of the land plot, the developer and the management company belong to one group and 100% private companies.	There are 2 Russian and 2 foreign producers in our industrial park. We managed to achieve a SEZ status for 6 months. There is the signed LOI with German company Phoenix Contact for localisation of their production and 3 more are under negotiations right now.	The estimated investment amount of potential Residents of the SEZ “STUPINO QUADRAT” amounts to 50 bln. rubles, which in 2015 will result in more than 230 bln. rubles of profit and creation of 6 thousand workplaces. We plan to attract 10 foreign companies to become residents of SEZ by the end of 2015	Yes	Yes	No	No	No	No	No	No	No	No	Yes	Yes	Yes	No	No	No	No	No	No	No	No	No	No	No	No	No	No	No	No	No	No	Yes	No	No
OnSlide	Early Stage	http://getonslide.com	Belgium	Bruxelles	2015	Mobile	Going to market	OnSlide helps retailers drive traffic to stores and data to analyze. Easily.	OnSlide is a mobile application presenting deals on slides, the ultimate pre-shopping experience. For marketing departments of major retailers and brands it is an easy way to drive trafic to the stores and analyse shopping behaviours. We have prioritized a B2B approach, working with headquarters.	Geoffroy Verney-Carron: business and geopoltics graduate, account manager @Oracle, serial entrepreneur. Cédric Moulin: 18 years of retail experience with leading international companies (both B2C and B2B). Youssef Aani: web and mobile developer, technical project manager.	Our product is a mobile application. Users will care because they love to shop and clients (retailers) will care because they want to sell and understand their clients. We believe that the way we respond to those interests is attractive enough to gather interest. We will favor a B2B/brands approach.	Any place really. Urban (lots of shops) or outlet villages. Might also work on fairs. If it gathers traction, it could spread in every country with high shopping profiles.	Many competitors really. Groupon for the deals, Mallzee or Glanse for the shopping experience (but more online than offline), Smoopa, Store brands apps and a whole new bunch of local small apps that aims at promoting local commerce. We believe our market strategy (B2B) will give us the edge.	Not launched yet	Have a client. Analyse the results. Build a POC. Raise money. Expand. We have already confirmed interests from three prospects (a retailer in Belgium, a shopping center in the Netherlands and an outlet village operator in France).	Yes	Yes	No	No	No	Yes	No	No	No	No	No	Yes	No	No	No	No	No	No	No	No	No	No	No	No	No	No	No	No	No	No	No	No	No	Yes
Kerros Solutions Oy	Early Stage	https://www.kerrossolutions.com/	Finland	Helsinki	2015	Enterprise software E-commerce & online marketplaces	Going to market	Industry changing SaaS solution for real estate property owners.	We are here to change the commercial real estate property market worldwide. We help property owners to increase their occupancy rate and lower costs. With our all in one SaaS solution they are able to rent faster their spaces and manage their whole portfolio more cost efficiently than ever before.	Tuomas Ryhänen, CEO & Technology - Lead ICT-projects. Entrepreneur for 1,5 year for now. Hannu Käki, Sales & Strategy - Over 5 years of B2B sales experience, SaaS sales experience and business development.	SaaS for commercial real estate portfolio owners. Solutions are easily scalable but can still to be tailored according to customer needs. One platform - All information, easier and faster than ever before!	Our major target groups are pension funds, investment funds, propert owners and local property managers. Over 50 billion € of portfolio owners are already ready to move on and continue discussions.	Competitors are both the current IT solution providors and service providors of the value chain such as real estate agents and property managers.	1st paying customer live - Revestor Oy, Finland. From 0% to 100%.	Direct sales to the decision makers on the top of the value chain. MIPIM in March. Short term penetration in Finland. Negotiations already well in the pipeline. In 1-2 year target five new European markets out of the pool Nordics, France, Germany, Spain, UK, Poland.	Yes	No	No	No	Yes	Yes	No	No	Yes	No	No	No	No	No	No	No	No	No	No	No	No	No	Yes	No	No	Yes	No	No	No	No	No	No	No	No
MURE ehf	Early Stage	http://www.murevr.com	Iceland	Reykjavík	2015	Health & wellbeing Virtual reality	Going to market	Workspace environment for Virtual Reality	We make Breakroom, a virtual reality workspace environment. When trying to work in a distracting environment our user puts on noise cancelling headphonesn and a virtual reality headset to enter another world. With some easy commands the user has perfect control over his applications and environment.	Anton Thorolfsson: A physicist, a Cambridge graduate Bjarni Rafn Gunnarsson: Education in computer software engineering ?and as a math prodigy Didrik Steinsson: With education in marketing, project management and experience in corporate sales.	We develop Breakroom, the virtual reality workspace environment software for Virtual Reality.	We have two types of customers. On one hand we have companies that want to increase the comfort and productivity of their employees for a fraction of the price of remodelling and increasing the size of their office space. Open Workspaces cover more than 80% of western workplaces.	Besides MURE a few companies and individuals have been working on products similar to Breakroom.	0	VR HMD´s launch early 2016. We will have a ready product by then, and will be one of the first VR productivity applications out there. Our strategy is to be first to market and build our client base from that.	Yes	Yes	No	No	No	No	No	No	No	Yes	Yes	No	No	No	No	No	No	No	No	No	No	No	No	No	No	No	No	No	No	Yes	No	No	No	No
Wipe AS	Early Stage	http://www.wipe.no	Norway	Bergen	2015	E-commerce & online marketplaces	Going to market	Wipe delivers safe home cleaning within 24hours, order online in 60 seconds.	Wipe is a new concept on home cleaning, we are taking the home cleaning business online, and at the same time organize the market, We believe we can change the home-cleaning industry forever,with our eagerness to take data-driven decicions,and implement tech and data in how we run our business.	Erik Dalland is CEO and co-founder together with Dennis Stokseth, we are the management team. Erik's key strengths are strategic mng and sales. Dennis has wide exp. as PM. Our advisors and investors are two of the founders of Adams Matkasse, Momentum Partners and one of the founders of Leaddesk.	Wipes value prop:*Easyness: order online within 60sec. Handle subscription on your phone.*On-demand: deliver within 24h*Safety: insured up to 10 mill. NOK*Professional: We only select and train experienced cleaners. In addition we follow them up to ensure high quality.	In Norway: 2,4 million houses, estimated 10 % use home cleaning today, we want to expand this market, its estimated to 400 million euro. Global market: Estimated 400 billion EUR opportunity in total.	Normal cleaning companies, and illicit work.The platform managing the demand and the capacity will have IPR value. Patents are not in sight, but own IPR will give comp.adv. Also, our company´s flexible service give comp.adv,Wipe deliver within 24 hours, you choose frequency,24 hour canc. policy.	Launched on 1st october. To early to state Churn-rate, CPA and LTV, but our underlying numbers (KPIs) from the first month of business, shows us that are on the right track	Our BM on how to gain market access, and to do so quickly is based on both online and offline marketing. Within 18m we expect 3,5 million euro revenue.	No	Yes	No	No	Yes	Yes	No	No	No	No	No	Yes	No	No	No	No	No	No	No	No	No	No	Yes	No	No	No	No	No	No	No	No	No	No	No
AllSharp Corporation Ltd.	Early Stage	http://www.allsharp.net	United Kingdom	Potters Bar	2015	E-commerce & online marketplaces	Going to market	AllSharp opens up new revenue channels for Hotels by optimizing existing assets	AllSharp is an innovative startup opening up new revenue channels for Hotels by optimizing the use of their existing assets without need for any additional investment thanks to its Se3d platform. The business model is flexible and easily extendable to many other facilities offered by Hotels	Founders:GreenSharp & F.FerrandinTeam: A.Guarneri,20 yrs IT experience and 10 years Entrepreneurship experience and Flavia Ferrandin,Commercial Director with 9 years sales experience	Se3d is a platform connecting service providers with consumers on the basis of geolocalisation,pricing,distance and capacity. The first declination is BagApp, an application allowing travellers to search, choose and book the baggage deposit service at the hotel nearest to their interest point	Our current focus market is the Hospitality and MICE industry but the platform is easily declinable to other industries.	The main competition are baggage deposits at train/coach stations and airports but they are static and require extra travelling on the consumers' behalf.	The company was founded in April 2015 and since then developed the platform, which includes frontend website,apps and backoffice. Market research and database for the London market is also completed together with an advertisement campaign plan ready for launch.	Our strategy is to launch BagApp in London and Milan in 2015 and extend to other major European capitals within the next 18 months. Our main metric for BagApp is the number of hotels affiliated to the programme in each city	Yes	No	No	No	No	Yes	No	No	No	No	No	Yes	Yes	No	No	No	No	No	No	No	No	No	Yes	No	No	No	No	No	No	No	No	No	No	No
Nativetap.io	Early Stage	http://nativetap.io	Poland	Poznan	2014	Mobile	Going to market	A device lab in your pocket.	The Nativetap mobile app gives you full remote access to hundreds of real smart devices—so you can test, debug, and design apps in a way that’s life-like, interactive and always in real-time.	Nina Wieczorek (CEO&hustler) & Marcin Gasperowicz (CTO&hacker). We have a team of 8 experts (low programming hackers, Android specialist, complex data architecture, stream, hardware and systems).	Most bugs in mobile apps are device specific and in order to fix them you need to have access to the real device. Nativetap almost "teleports" all devices on your desk and	There are 1.6 mil apps in the Google Play and there is 25% yoy growth in mobile fragmentation - this makes the huge market opportunity.	There are companies which allow running automated tests on many devices (Amazon Device Farm, Google Device Lab, Xamarin). Non of our competitors offer life-like, real time interaction with a remote device and native debugging breach. In fact our service is complementary to these companies.	There is a high barrier to entry for our product. We have been in closed beta for the pas 6 months and we have now almost 5k beta users.	We expect to reach $100k in revenues by the end of 2016.	Yes	No	No	No	Yes	No	No	No	Yes	No	No	No	No	No	Yes	No	No	No	No	No	No	No	No	No	No	No	No	No	No	No	No	No	No	Yes
Virhi	Early Stage	http://www.virhi.com	Finland	Närpiö	2014	Communications & media Enterprise software	Going to market	Virhi is a freemium platform for fixing problems in your community.	Virhi is a freemium platform for fixing problems in your community. The solution is beeing developed in a municipality perspective in close cooperation with cities. Report problems, follow the progress and see them fixed. Fully integrateble with cities existing systems or use as stand alone service	Magnus Pått Anas Shekhamis Malin Kankaanpää	Virhi is a freemium platform for fixing problems in your community. The solution is beeing developed in a municipality perspective in close cooperation with cities. Report problems, follow the progress and see them fixed. Fully integrateble with cities existing systems or use as stand alone service	We are aiming on finish municipalities during our beta stage. Scandinavia comes next. Selling upgrades is for survival, larger incomes are going to be from comission on integreating private companies for fixing tasks, a marketplace for open issues in cities.	Existing solutions are big enterprise packages, only local or lack support from cities/municipalities. Our solution is easy and free to implement, upgrade packages for more features.	No growth for the service yet.	Our aim is to have a good share of the scandinavian market using our services, aiming in launching marketplace for open issues to private sector after that.	Yes	No	Yes	No	Yes	No	No	No	Yes	No	No	No	Yes	No	No	No	No	No	No	Yes	No	No	No	No	No	Yes	No	No	No	No	No	No	No	No
LinearHub	Early Stage	http://www.linearhub.com	Korea, Republic of	Seongnam	2015	Enterprise software	Going to market	LinearHub provides Roundee collaboration solution with video conference archive.	Cloud HD video conference is offered with recording and archive over mobile and Web. Easy access to set up conference and to invite external partners. The clip of video conference is archived, searched and shared.	Mr. Sunghyuk Kim is CEO and founder. He achieved more than USD 10 million revenue per year. Members have experienced over 14 years in IT and telecommunication industry on average. We work together 10 years as a team. Members have high technical skills through many commercialization experience.	Roundee provides video conference integrated with the rich collaboration features. It differentiates the conference by archiving. The archived clips can be shared for collaboration and be searchable. The Roundee is video conference version of slack.	Roundee is good for SMB(Small Medium Business.) That’s why built upon Cloud(AWS) and WebRTC(HTML5) technology, customers can use the HD video conference without investment in the specialized conference facilities. Company can save money and improve productivity by sharing and archiving conference.	Roundee has many and big competitors such as WebEx, Hangout, Skype. There service is just proving conference service. On the other hand LinearHub Roundee provides to video conference and archived. No other service provide this kind conference archiving for company.	We have developed SNS system to send large text, images and document, video conference system and web browser for HTML5 for any device. Further, we provides advanced search. Customer can search all data he wants to find it because our data from server. It helps for business.	We are going to interworking roundee service with MDM(Mobile Device Management) and collaboration service such as Slack and Hipchat to provide Roundee service. We find a way to connect with other industry services using video conference Open API.	Yes	No	No	No	Yes	No	No	No	Yes	No	No	Yes	No	No	No	No	No	No	No	No	No	No	No	No	No	Yes	No	No	No	No	No	No	No	No
Lukoton	Early Stage	http://www.lukoton.com	Finland	Espoo	2015	Industrial internet & IoT Mobile	Going to market	Smarter than any smart lock - we make your existing lock smart	Lukoton is The mobile access company. We create safe and reliable mobile access solutions for B2B clients. Our principal service areas are keyless solutions for hotels, estates and remote infra critical stations.	1) Hannu Katajamäki, CEO: 20y executive experience in global business, including P&L resp 2) A-P Hietala, CXO: 16y experience in mobility, access control and service business 3) Jarkko Juntunen, CTO: 17y experience in IT solutions 4) Petri Pystynen, UXD: 15y as service designer and branding	112 emergency access for residential buildings. Traditional mechanical keys are easy to copy and rescue department don't want to carry them per building. Smartphone as a key and cloud based access management is the solution. The same interoperable solution help also other building service providers.	In EU region we have 5 million entrance doors in residential buildings. If all buys our solution, the market potential is 2,5 billion EUR. We are targeting to 1% of the doors in EU by 2020. This can generate 25 million EUR as HW sales. On top of that, we have service sale, as recurrent revenue.	- leave door open (not secure) - mechanical keys (not secure, difficult to manage, pick up, carry, sore, return) - Pin-pad (not secure) - electromechanical keys (need to collect, carry, store physically and return) - electric access control solutions (way too expensive for interoperable use)	11 months old, but: A) Product development 80% ready B) Piloting with customers started C) 138k€ public funding received D) New CEO hired E) New sales person hired	We want to complete the city where we pilot at the moment and finalize our business model with customers. This means also 2 MEUR revenue for us when ready. Then we move to a service business phase in that city and new cities...	Yes	No	No	No	No	No	No	No	No	No	No	No	Yes	No	No	No	No	No	No	No	No	No	No	No	No	No	No	No	No	No	Yes	No	No	Yes
ThinkINside	Early Stage	http://thinkinsi.de/	Italy	Trento	2015	Industrial internet & IoT Analytics, big data & AI	Going to market	Location-based services and analytics for indoor spaces.	ThinkIN offers a portfolio of industry shrink wrapped IoT solutions for location-based services and analytics. Leveraging accurate indoor positioning and state-of-the-art big data tools ThinkIN boosts the efficiency and profitability of businesses and organisations operating in indoor spaces.	Iacopo Carreras, CEO, 15 yrs in ICT industry Diego Taglioni, CFO, 20+ yrs in multinational companies Dimitrios Dovas, COO, 20+ yrs building multibillion businesses Andrei Tamilin, CTO, 10+ yrs in developing innovative sw solutions Daniele Miorandi, CRO, 120 publications and 4 patents in ICT	An IoT platform integrated with accurate indoor positioning systems and big data tools. Providing accurate KPIs for operations optimization. Enabling location-based services and real-time content delivery. Out-of-the-box packaged solutions for retail and healthcare verticals.	Target: indoor location market. Size: $935.05 million in 2014, CAGR 36.5%, projected to $4.42 billion in 2019 (source: Markets&Markets). Targeted verticals: retail (primary), healthcare (primary), oil&gas, cruise ships.	Competition is fragmented, mostly consisting of companies with specific, silo-like solutions for specific verticals (e.g., RetailNext, Walkbase, ShopperTrak and EuclidAnalytics for retail, TeleTracking for healthcare etc.). All using coarse-grained (WiFi, video, beacons) indoor positioning tech.	Incorporated in June 2015, going to 150k$ revenues by Dec. 2015. Paying customers in Italy, Germany and US.	Aggressive marketing, go-to-market through partnerships for scaling up. Expansion in US, EMEA, APAC markets for retail and healthcare. Release of shrink-wrapped solutions for oil&gas and cruise ships verticals. Up to 25+ staff by Q2/2017. Three rounds foreseen in in 18 months for a total of 25M$	Yes	No	No	No	Yes	No	No	No	Yes	No	No	Yes	No	No	No	Yes	No	No	No	No	No	No	No	No	No	No	No	No	No	No	Yes	No	No	No
Imhoclinic LLC	Early Stage	http://imhoclinic.com	Russian Federation	Saint-Petersburg	2015	E-commerce & online marketplaces Health & wellbeing	Going to market	TripAdvisor for private medical clinics.	Imhoclinic.com is online aggregator and booking system, which collects and analyses reviews about all medical clinics from all online sources and leads patient to clinics. It gives possibility for patients to choose most suitable clinic and doctor and book an appointment online in 4 clicks only.	Alexander Poltavchenko - CEO Finland,Co-founder.Founder of 'Hb Cosmetics'.Turnover 150 k EUR in 2014. Nikolay Tikhodeyev - CEO Russia,Co-founder. 2010-2014 Co-founder and CEO of 'Exponenta' - biggest technology fair in Russia. + Programmers who have huge experience in booking.com, vk.com, etc	In our technology we use special media monitoring robot that collect and analyses reviews from all Internet sources. Also we calculate unbiased clinics' rating based on verified reviews. Our booking system let patients to book an appointment in 4 clicks or do it by free phone number.	We are currently working on Finnish and Russian markets. There are more than 28 mil patients visits to private clinics per year. And more than 7 mil appointments are booked online. According to our business model (15EUR\booking) it is 105 mil Eur\Year.	We don't have direct competitors on both markets, however there are: 1) Review aggregators. (Yelp;Yell). But they don't have online booking system. 2) Clinics with online appointment (Dextra;Medi). But it is just one clinic. 3) Online med scheduling service (docdoc). But they don't have reviews.	We are just 8 months old company. For now we have a great team; working prototype, which was tested and have great feedback; and we have more than 30 clinics signed to our service.	We are planning to launch mobile app, take quarter of Moscow and Saint-Petersburg online booking markets, reach self-repayment and get 140 000 euro month revenue.	Yes	Yes	No	No	No	No	No	No	Yes	No	Yes	Yes	No	No	No	No	No	No	No	No	No	No	Yes	No	No	No	No	No	No	Yes	No	No	No	No
GetShopTV	Early Stage	http://getshoptv.com	Russian Federation	Moscow	2015	E-commerce & online marketplaces Communications & media	Going to market	GetShopTV - TURNING AUDIENCES INTO CUSTOMERS	GetShop.TV – The new generation platform that allows viewers to buy directly from the TV screen while watching commercials or television broadcast using the TV remote and / or smartphone (second screen).	Andrey Grigoriev- Ex Webprofy, UMI, Vidimax, GetShopApp, Mentor IIDF. Karmo Sharif, COO -ex SunFashion, GetShopApp, Vidimax. Nickolay Kudasov, CTO - Ex glowbyte, GetShopApp,Vidimax. Igor Lutz, Head of Board, BBDO Russia Founder	Ad banner overlay TV commercial or movie and prompt viewer to buy a product by pressing OK button on TV remote, «OK» button leads viewer to the product purchase menu.?The viewer can get a mobile checkout link (via SMS) or request a call back.	Our target - Big federal brands who use TV Advertising, currently we are focused on autodialers, FMCG, pharmaceuticals, developers, big e-commerce.? Russian aVOD market is 52M$, our target audience takes 57% of it. Smart TVs will account for 73 % of global flat screen TV shipments by 2017	Delivery Agent, Brightline, Innovid, Weborama. We are not selling media ads, we are selling leads from media ads, our main goal - conversion rate of our clients . We connect TV ads with Google analytics and e-commerce metrics. We gonna work not only in VOD market, but in live stream broadcast.	We started the company 2.5 month ago. We have a launched product, and we gonna start 3 ad campaigns in November with average budget of 9000$ per campaign	In less than one year in we gonna change our model of monetization to CPA, so we are launching CPA on TV. We already started integration with biggest Russian cellular provider MTS, to run our service not only on VOD but on live channels.	Yes	No	No	No	No	Yes	No	Yes	No	No	No	No	No	No	No	No	No	No	No	Yes	No	No	Yes	No	No	No	No	No	No	No	No	No	No	No
UrbSpotter Oy	Early Stage	http://urbspotter.com	Finland	Helsinki	2015	E-commerce & online marketplaces	Going to market	UrbSpotter is a mobile application that brings the local brick-and-mortar supply	UrbSpotter is a socially active and free of charge mobile application that brings the local supply to every Urbster's palm! It offers a vast real time supply under on shop-in-shop solution with uniform search experience. The app makes the whole city accessible to urban consumers.	We have a strong team of eight including our four founders. Together we have over 40 years of experience from entrepreneurship, software development, consumer marketing, contracts and legal issues, b2c, b2b sales and finance. We are a strong academic team with heterogeneous backgrounds.	UrbSpotter combines the best parts form virtual and physical shopping. Consumers can browse real time rack supply from nearby stores, read and search styles and products from the app, wonder around in the map page, end up strolling beautiful shops, create their own profile and chat with the vendors.	Our target market is cities in Europe with real brick and mortar shops. These cities have relatively high usage of mobile devices and young minded inhabitants with urban lifestyle. Our first market is Finland where we have roughly 11 000 stores in the major major cities.	Our position is between online store providers and traditional marketing channels. The main competitors are traditional online stores that are starting to understand the value of physical awareness. Both these channels have their advantages but they cannot deliver seamless experience like we do.	UrbSpotter has grew up from 4 founders to the team of 8. Our co-op network has witnessed a real boom. Coding has been hectic and everything else been laid out for a great launch of our product. First clients, 70 of them, are now in and the base is growing. Proof of concept is almost here!	To achieve a strong foot hold in the market (=more clients) with high level of transparency, co-operation, great cost to benefit ratio and first in line solution. Our goals include launching the product and reaching loyal user base accompanied with vast expansion of users. To plan our Eur-conquest	Yes	Yes	No	No	Yes	Yes	No	No	Yes	No	No	No	No	No	No	No	No	No	No	No	No	No	Yes	No	No	No	No	No	No	No	No	No	No	No
Spectral Engines Oy	Normal	http://www.spectralengines.com	Finland	Helsinki	2014	Wearable technology Industrial internet & IoT	Going to market	Sense the very building blocks of your surroundings	Spectral Engines is set to change how we see the world around us through miniaturizing the world's most powerful non-invasive measurement technique into tiny sensors for better quality products, better environment, improved health and safer world for us and our children.	Founders: CEO Jarkko Antila; CCO Janne Suhonen; CTO Uula Kantojärvi; Senior Engineer Jussi Mäkynen; Other key persons: Application Engineer Matti Tammi	Miniaturized MEMS spectrometers, these Sensors are plug-and-play devices with easy-to-use software. In addition to enabling test setups in laboratories, the Spectral Sensors are fully compatible with real industrial surroundings.	Market opportunity for Spectral Engines is $1B+ by high-volume sensor components (5€) and systems (100€) * Wearables market $13B at 35% * Spectroscopy market $13B by 2017 at 12% * Healthcare Analytics market $16B by 2020	A handful of companies are working on miniaturising infrared spectroscopy in order to take the power of spectroscopic measurements to the masses. However, they are restricted in their technology to not reaching the cost and the miniaturisation level demanded by consumer applications.	First year sales 0.3 M€ with second year forecasted to show 3x numbers.	Taking the new products to market in 2015-2016 will result in high growth in the coming years with at least 2x -3x annual growth expectation.	Yes	No	No	No	Yes	No	No	No	No	No	Yes	No	Yes	No	No	No	No	No	No	No	No	No	No	No	No	No	No	No	No	No	Yes	No	No	No
Teslawatch	Early Stage	http://www.teslawatch.ru	Russian Federation	Saint-Petersburg	2014	Industrial internet & IoT	Going to market	“Teslawatch” develops, produces and sales wearable: smart bands & smart watches	“Teslawatch” is a startup company that creates innovative solutions in the field of wearable devices for health, fitness and banks. Our main competence - customization of wearables for the demands of corporate clients, including using NFC technology.	Sergei Dulin: CEO, project manager. Background: 7 years of successful enterprenurship in IT and trading. Ksenia Matveeva: Marketing director. Background: 7 years of experience of top management in sales and marketing in IT, including 4 years on position of marketing director in Veeam Software	Smart bands with the functions of: - Monitor daily activity - Calculation of number of steps walked, distance passed and calories burned - Sleep monitor - Smart alarm - Reminders to drink water and medicines Solution can be customised to control sport activities and make payments.	Territory: Russia, EU, Latin America. Teslawatch is working on different innovative projects: 1) For bank system fitness-tracker and credit card. 2) for school childrentracker of daily activity: sleeping hours, walking distance, trainings, set of reminders 3) for sport - tracking of effectiveness	in B2B we do not know competitors who have ready to go to market product. In B2C: Xiaomi, Jawbone, other smartbands producers	We began to sale. 6000 devices are sold.	Plan to start B2B sales based on current requests from potential clients.	Yes	Yes	No	No	No	No	No	No	No	No	Yes	Yes	No	Yes	No	No	No	No	No	No	No	No	No	No	No	No	No	No	No	No	Yes	No	No	No
Plane.	Early Stage	http://tryplane.com/	Denmark	Copenhagen	2015	Social media Mobile	Going to market	Social Icebreaker for Expats.	Plane makes it easier, more useful and less awkward for expats to break the ice in the city around them. A solution to empower stronger offline connections and connect with your neighbourhood. Not the sleazy dating BS or tired old expat platforms.	Tim Allison CEO ( Ex CEO of Cupple - Acquired by YC Alumni, Tenthbit Inc - 2013 ) Thomas Jacobsen CTO ( Ex CTO, Kiggit - Startup Bootcamp Graduate )	Write Signals from your neighbourhood, get responses from other users, swap and collect 'Social Cards', Meet new people, arrange things to do, or simply find out what's going on around you. Our target audience is currently Expats in Scandinavia.	We are addressing an emerging demographic known as the Next-Pats, a social group that has embraced the possibilities provided by technology to lead more connected lives. Highest proportion of Next-Pats falls into the 25-34 age bracket. Next-Pats will represent half the population of the US by 2020.	Competition - Yik Yak, Meetup, Tinder, Facebook Groups. Advantage - Building right now for a specific target audience (expats) FOCUS.	Built demo, bootstrapped, raised angel money, built team, found a place to work, launched alpha, launched beta, got press, at SLUSH launching...	Launching in new cities where there is large international presence. i.e.Zurich, Brussels, Geneva, Berlin. Then moving into LDN and then US. Replicating launch model in CPH and repeating. Once proven with Expat 2 Expat we go Expat 2 Local (also Student)	No	Yes	No	No	No	No	No	Yes	No	No	No	Yes	No	Yes	No	No	No	No	No	No	No	No	No	No	No	No	No	No	No	No	No	No	No	Yes
Shoop Ltd	Early Stage	http://www.shoop.io/	Finland	Helsinki	2015	E-commerce & online marketplaces	Going to market	SHOOP is open source SaaS e-commerce platform for today’s transparent world	Ten years of exploring, testing, and modifying existing technologies has led to the development of a SHOOP’s super strong and secure architecture. SHOOP is the perfect blend of American entrepreneurial spirit and the honest tech values of Finland.	TOMI (CEO / CHAIRMAN), SAMI HALTIA (MARKETING/PR) HEIKKI SAARI (PRODUCT OWNER) MIKKO FLAGAN (BUSINESS DEVELOPMENT USA) TUOMAS SUUTARI (SCRUM MASTER / DEV) AARNI KOSKELA (LEAD DEV) JANNE TAMMI (DEV) PANU TULIMÄKI (DEV) JUHA KUJALA (UI/UX/FRONT-END DEV)	Our product is open-source and based on common standards giving you excellent efficiency, speed to market and customizability. Our fully featured core system can by enhanced in every way through our many add-ons and integrations or by altering the code itself. This way, anybody can create a great	1. USA, 2. CHINA 3. GLOBAL	OS 1. Magento 2. Prestashop 3. OpenCart 4. VirtueMart 5. OSCommerce 6. ZenCart 7. UberCart 8. Xcart9. MivaMerchant 10. CubeCart CLOUD 1. Shopify 2. Bigcommerce 3. Woo Commerce 4. Volusion 5. Demandware 6. Fusebill	-	-	Yes	Yes	No	No	No	Yes	No	No	Yes	No	No	Yes	No	No	No	No	No	No	No	No	No	No	Yes	No	No	No	No	No	No	No	No	No	No	No
Sessio	Normal	http://sessio.mobi/	Finland	Helsinki	2015	Mobile Communications & media	Going to market	Visual action. Draw and talk on a shared image.	We focus on visual collaboration unleashing the potential of mobile devices for smart collaboration and data gathering for workers on the go and field.	Tomas Westerholm, Sales Maria Jose Mera Collantes, CEO Mikko Mikkola, Lawyer Tito Toivola, Business Development Robert Miles Kemp, Head of Design Vitali Vasylenko, Software Developer	Sessio solves a repeating issue within everyday live.Let's keep it simple: talking while drawing together on a shared STILL IMAGE to solve any visible issue instantly without travels or pauses.First paying users have gained benefits and want to extend the use to their collegues.	Users of traditional phone calls who have anything visual to explain. We offer an added feature to the traditional call, potentially creating a new category. More narrowed down segment is construction and service jobs (visual explaining needs) and content creation services (again, visual explaining)	Other collaboration solutions with more features. We are focusing to make a simple tool for one specific but potentially very general need - into your pocket for as simple and fast use as possible to enable mass phenomena use. Our pending patenting plan points to a big exit.	We have a Google Play release for Android and have a handful of test users and two multi-user customers.	Public launch. Sales work to get SME's on board as users and channels to consumers. Improving the team.	Yes	Yes	No	No	No	No	No	No	Yes	Yes	No	No	Yes	No	No	No	No	No	No	Yes	No	No	No	No	No	No	No	No	No	No	No	No	No	Yes
BRIEFR Messaging App	Early Stage	http://www.briefrmessaging.com/	Finland	Espoo	2015	Social media Communications & media	Going to market	Radically easy way for sending wonderful photos and images person-to-person.	Launching now, a cross-platform (phones, tablets, PC, AppleTV, X-Box) app which is simpler and easier to use than competition. Channel for graphics designers, photographers to sell content globally. Unique 3D-messaging coming, game-like user interface patented, rich content and feature roadmap.	CEO/Founder: Ismo Hautala, 4 yrs entr, 15 yrs UX, SW devel. & leadership CTO: Mika Hoikkala: >15 yrs solution architect CMO: Tanja Levo, 3 yrs app marketing, 15 yrs finance leadership. CDO: N.N. (undisclosed), >15 yrs UX design Senior Testing Mgr: Marko Närvä	For the users, BRIEFR brings extreme simplicity to messaging, especially to sharing images person-to-person. For graphics designers and photographers, BRIEFR is a new marketplace to sell wonderful content to users globally.	Content-focused messaging market, similar to LINE and WeChat. Especially customers who like to send photos, videos, stickers and other visual content to their friends. Market opportunity projection 2,5 billion users and 45 billion USD in revenue by 2017.	Main competitors are the mobile messaging apps which create revenue by selling digital content and services such as LINE and WeChat. BRIEFR has the advantage of radically simple, patented game-like user interface, being the first in AppleTV, and cross-platform reaching smarphones, X-Box and PC.	From concept to first commercial product in 3 months, cross-platforms ready in 8 months 2015. First market feedback being gathered now. Good user feedback received on user interface and email address -based use.	More than 3 million active users and $10 M in revenue. Means are effective app marketing and clear differentiation from competitors. Monetization through selling digital content and services (emojis, digital art, games, mobile payments). Expected ARPU 3,5€.	No	Yes	No	No	Yes	No	No	Yes	No	No	No	No	No	Yes	No	No	No	No	No	Yes	No	No	No	No	No	No	No	No	No	No	No	No	No	No
Diske Inc	Early Stage	http://www.diske.net/	Finland	Kuopio	2014	Health & wellbeing Analytics, big data & AI	Going to market	Diske Inc - we code health.	Our intention is to create health and wellness solutions for professionals and consumers all over the world. We want to get everyone to eat healthy and move. We are trying to expand the interaction possibilities between different health professionals and consumers.	Timo Kettunen is a health and exercise medicine expert and a visionary. He wanted to start a business to create revolutionary health softwares for everyone. Tuomas Soinne is a programmer with a background of released web stores and auction systems. We are looking for team members.	Fudbot is the easiest health management software ever. It will act as an interface between consumers and healthcare and fitness professionals. It is very flexible multitool system that amongst many other things, tracks and collects big data, express it in understandable form.	Fudbot has multiple potential market groups worldwide; consumers in different categories (e.g. housewives and athletics), fitness centers, doctors/nurses and medical centers, pharmacies and businesses who wants to license our API. We want to increase primary prevention and to reduce expenses.	There are a lot of softwares in the market, but none of them have a possibility to factor everything this easily and with so many unique variables, and with selection of common drugs and diseases and allergies. There are no software that makes cost-effective lifestyle medicine guidance possible.	We have stabilized our business and are clients of an enterprise accelerator and Kuopio Innovation. We got 50 k€ from Finnvera and finalized our first software version. We'll release Fudbot in additional parts, adding new target group by each update. We were just picked to Web Summit Alpha program.	We will release our major updates in Q4/2015 and Q1-Q4/2016. Our plan is to release Fudbot in USA during 2016 (EU 2017) and increase our revenue up to several million dollars / year. We recently got quite big call for offer from USA concerning Fudbot. This without any advertising.	Yes	Yes	No	No	Yes	No	No	No	No	Yes	Yes	No	No	No	No	Yes	No	No	No	No	No	No	No	No	No	No	No	No	No	Yes	No	No	No	No
Happy L-Lord AB	Normal	http://www.adventurebox.com/	Sweden	Stockholm	2015	Gaming	Going to market	AdventureBox.com lets everyone create and share their own computer games.	Happy L-Lord AB makes AdventureBox.com which lets everyone create and share their own computer games in the browser. Upload your Minecraft world, add life to it with characters, dialogue and behaviors. Define story steps and publish your game for the world.	Christopher Kingdon, CEO, co-founder. Serial Entrepreneur. Listed by IDG as Sweden's 4 IT Entrepreneur 2013. MBA, MSc. Rob O'Leary, CTO, co-founder. Super programmer, voxel expert, Stanford co-operations. BSc. Colin Cragg, CPO, game producer veteran, ex CEO StarStable etc.	Upload your Minecraft world to AdventureBox.com, add life to it with characters, dialogue and behaviors. Define story steps and publish your game. You can now share it by posting a link to it or embidding your game on your own web site. You can use story templates to help you create fun games.	Computer Game industry worth 21.5 BUSD 2013. Minecraft was the 9th best selling game with about 50M sales on all platforms. The community is very active and share creations on sites such as www.minecraftmaps.com. Multiple Minecraft Youtube bloggers like Stampy Cat have large followings.	Roblox is the biggest game long tail success so far. But they are an app that needs to be downloard. Despite this 45 MUSD in revenues and 4,5 MAU. 80% dont downloard. Multiply with 5 for Adventure Box. And again for viral spread. Then add speed from addressing the existing Minecraft community.	Added over 30000 social media followers. 4000 alpha testers/news letter receivers. 1549 Beta accounts. 579 MAU	2015 projected 880 kEUR revenue 2016 projected revenue 4,4 MEUR, 2 MEUR profit 2017 projected 10 MEUR, 5 MEUR profit	No	Yes	No	No	No	No	No	No	No	Yes	No	No	No	No	No	No	No	No	No	No	No	No	No	No	No	No	No	No	Yes	No	No	No	No	No
Epic Owl Ltd	Early Stage	http://www.epic-owl.com/	Finland	Helsinki	2015	Gaming Mobile	Going to market	Epic Owl makes mobile competitive PvP Free-to-Play games for core gamers.	Epic Owl Ltd makes PvP focused Free-to-Play mobile games for the mid-core+ player market. Our Product Key Values are: captivating and emergent gameplay, human interaction, focus on gameplay over IP development, mechanical depth and longevity.	Juha Vainio, CEO - Background in games, management and leadership from Rovio, Nokia, Accenture. Risto Holmström, CCO - Background in games, design, art from Rovio Ville Nousiainen, VP of Development - Background in games, programming from Rovio	Our first title is a novel free-to-play mobile player-vs-player game which is designed gameplay first and offers very in-depth and addictive gaming experience for mid-core+ gamers. The game concept itself is a new one, but it is using proven free-to-play mechanics for retention and monetisation.	Our market opportunity is with the core gamers who up until now have been playing on PCs and consoles. It is clear that they are interested in moving to mobile games but so far, no worthy games have been launched. Our game will offer them the in-depth gaming experience they crave for.	There are some companies that are trying to tap into the same core gamer market but where they concentrate on providing visuals first, we know that the core gamers first and foremost go for the deep gameplay experience. No mobile games are offering that at the moment.	Too early to say, our company is still working on the first product.	Our strategy is to launch the first game, learn and start working on the second at the turn of the year. Goal with the first game is to establish and prove our capability within the industry. With luck it will already be a game-changer but our real bomb will be the second game.	No	Yes	No	No	No	No	No	No	No	Yes	No	No	No	No	No	No	No	No	No	No	No	No	No	No	No	No	No	No	Yes	No	No	No	No	Yes
Happy Monkey	Early Stage	http://happymonkey.eu/	Finland	Helsinki	2015	Education	Going to market	We help companies bake quality into everything they do.	We provide training, coaching, project workforce and strategic consultancy in the area of modern quality management. While specializing in Agile and Lean workflow models, context-driven testing and automation solutions, we provide wide variety of services via our partner and community networks.	Our founding fathers are: Sami Söderblom, one of Finland's leading experts in context-driven testing and quality management; Mika Rantonen, one of Finland's first Agile and Lean coaches; Jari Mitro, one of Finland's leading experts in technical testing and automation.	Even though the age of Agile and Lean is at full swing at the moment, relevant quality practices seem to be lagging behind. We focus on bringing quality leadership up to speed with the rapidly changing world by mixing cross-scientific approaches and heuristic models.	We prioritize software development market, but we're not limited to it. Our mechanisms have been used to bring quality into media production, movies, whiskies and even people. The market opportunity is basically limitless.	Our main competitors are the big consulting companies who create revenue with obsolete, but established methods. This creates disorder, which over time creates possibilities for companies offering alternatives. And currently only some individuals can provide what we provide as a company.	We are still at the very early stage of our business. We've done training, coaching and consulting for 80-100 kEUR worth, but otherwise we're still looking for gigs that would give us enough reason to leave our "day jobs" and go all-in as Happy Monkey consultants.	Our strategy is to grow visibility and make customers understand that they too can enjoy from high quality. We proceed incrementally i.e. we need to hit solid 100 kEUR cash mark before expanding with next 1-2 employees. We bill 90-130 EUR/h (training sessions x 2) so that should be met in 18 months.	Yes	Yes	Yes	No	No	No	Yes	No	Yes	No	No	No	Yes	No	No	No	No	No	No	No	No	No	No	Yes	No	No	No	No	No	No	No	No	No	No
Proxy42 Inc.	Normal	http://father.io/	United States	san francisco	2015	Wearable technology Gaming	Going to market	Games As Real As Life	We transform reality in the new media, enabling innovative game experiences that interact with people, places and things around usWe develop the first "wearable" device especially created for gaming and its first game http://father.io, a Massive Multiplayer First Person Shooter played in real life	Francesco Ferrazzino CEO and Founder Zulay Barrero CXO and co-founder Annalisa Dalbon COO Jari Ognibeni CFO Tarun Garg CTO	More than 260000 subscriber are in waiting list for the beta of our game, with $0 marketing budget. That's happened because we offer a unique UX: an AAA game experience like "battlefield" and "call of duty" but in real life, on their mobile phones, played in their city with their real friends.	there are 1,231 million of gamers for a total addressable market of $86,1 billion. We are in the intersaction of three of the most growing market in the world: mobile games, Wearable & IOT, and hard core games.	Dust Cloud, google ingress, lyteshot.No one of these competitors give a level of game experience like father.io: their hardware are much limited (20 meters of interaction instead of 50meters), less portable and more costly or give no action gameplay like google ingress.	with a microseed (<$70k) in the las 12 months we finalized 3 generation of hardware prototypes, a working demo of the game and we achieved 260000 subscriber in wait list for our beta, with $0 marketing budget	We expect to launch Crowdfunding in the next months and then get a series A to get in the retails.The strategic gameplay of the app will be free and will work even without our hardware, both from desktop browser and mobile, to assure our company a frictionless user acquisition.	No	Yes	No	No	No	No	No	Yes	No	Yes	No	No	Yes	No	No	No	No	No	No	No	No	No	No	No	No	No	No	No	Yes	No	No	No	No	No
TEQMINE ANALYTICS OY	Early Stage	http://www.teqmine.com/	Finland	Helsinki	2015	Enterprise software Analytics, big data & AI	Going to market	Introducing Big Data Technology and IPR Intelligence Solutions	Big Data Technology and IPR Intelligence. Automated and Artificial Intelligence Assisted SaaS solutions to identify what matters for your most important business and investment decisions.	Hannes Toivanen, Ph.D. CEO, co-founder. Responsibility: Biz Development & sales. Bio: Over 15 years of international (EU, US, BR, Africa) experience from innovation intelligenceArho Suominen, Ph.D. CTO, co-founder. Bio: Over 10 years experience from innovation intelligence. Co-founded 2 firms	TECHNOLOGY MAP: Track precisely your Technology and IPR landscape as it evolves. Affordable for Small and Large Firms. PATENT SIMILARITY: Find out rapidly how similar your IPR is to millions of full-text patents. Available to single or thousands patents	Key: Medium and Large Companies that need to improve the management of new business development and IPR strategy. Solution is unique, as we avoid any legacy planning. We also provide unprecedented IPR intelligence quality for Start-Ups, as our services are substantially cheaper than legacy options.	Our main competitor is the lock-in in mental habits of VCs.rs, but they offer the old way. Our services require firms to change, and sometimes the switching cost is there. We do NOT compete with patent attorneys. Legacy patent database vendors are our competitors, but not in innovation	Company has been financed with income from custom products. Key metric is sales (see next box), as well as launch of improved or new products. We have pre-agreed launch-dates. Additionally, we have metrics for international sales this year, and things are moving faster than expected.	We look to double our turnover this year and next year, and we are on-target. We are building distributor network for start-up and commercialization of research market, and our staff focusses on large clients and international sales currently.	Yes	No	Yes	No	Yes	No	No	No	No	No	No	No	Yes	No	No	Yes	No	No	No	No	No	No	No	No	No	Yes	No	No	No	No	No	No	No	No
Futurefly Oy	Early Stage	http://www.futurefly.net/	Finland	Helsinki	2014	Social media Gaming	Going to market	We bring the fun to consumer apps, through intuitive gamesnacks.	We are a group of developers with over 50 years combined experience in gaming & app development. We evolve proven mobile app concepts with fun in mind. By adding intuitive game mechanics we take a pioneering approach to traditional apps, increasing user engagement, retention and monetisation.	We've worked for amazing companies like Electronic Arts, Microsoft, Remedy, Grey Area & Sulake, to name a few. We've worked on a multitude of successful apps & games from Alan Wake to Death Rally and Angry Birds, from Habbo to Shadow Cities, and many more.	We are currently working on an exciting new take of an asynchronous messenger called Rawr. It's like WhatsApp, But Fun! We are evolving the messenger, with 3D avatars and animations that come alive through text and emojis.	We are mainly targeting teens and millennials (13 to 25 y old). The market is huge and we'll be concentrating on the US / Western market first.	Every successful messaging app has brought something new. Rawr is the first 3D avatar messenger & the most fun place to message. We are competing on the user time vs. other apps - no winner takes all in the messaging space. On average, teens use 4 messenger apps simultaneously.	The closed alpha for some 1000 users was launched in May and the Open Beta phase starts in October 2015.	We are launching Open Beta globally in January 2016.	No	Yes	No	No	No	No	No	Yes	No	Yes	No	No	No	No	No	No	No	No	No	No	No	No	No	No	No	No	No	No	Yes	No	No	No	No	No
Wibe Wellbeing Solutions Oy	Early Stage	http://wibe.fi	Finland	Helsinki	2015	Education E-commerce & online marketplaces	Going to market	Commercializing know-how online like Alibaba.	We enable experts to create online video-courses, to sell the courses to targeted mass audiences and to deliver digital content through mobile applications worldwide. Enterprise customers can find quality training for their employees.	Petri Koskinen CEO: serial entrepreneur, co-founder Symbio. Successful exit abroadAri Mäkelä COO: serial entrepreneur, founder Intstream. Succesful exit abroadOlli Vättö CTO: ex-Accenture Fin Java Capability LeadToni Kokkonen Sales: Networking, int-politicsSunwha Park Design: ex-Samsung	Wibe Academy is cloud-based mLearning platform. It includes Wibe Studio to create video-courses, Wibe Online Store to sell the courses and Wibe Mobile Apps to deliver the courses to targeted customers. The platform is changing the way the experts will share their know-how.	We position ourselves on the cross roads of SaaS eLearning, mobile video and eCommerce platform markets. Self-paced eLearning market alone is expected to reach $51,5 billion in 2016. Together with expected 13-fold growth of mobile video usage between 2014-2019, this market is big and fast growing.	Current eLearning services are mainly targeted at individuals seeking career improvement. Our competitors include udemy, Skillshare, Lynda and video distributors Vimeo and Dream Broker. Wibe Store differentiates us by allowing companies to buy digital training for employees with mass-discount.	We have founded the company and grew our team to eight employees. First software platform version is developed now and ready for domestic launch in Finland. Agreements with our first B2B customers are done, deals valued $180,000. Also commercial agreements are done with multiple content providers.	Market launch in Scandinavian market and establishment to Asian markets like India, China and Singapore. Sales target: $800,000. Further development of service platform is ongoing. Our goal is to finalise commercial agreements with top media, training and consulting service providers in Scandinavia.	Yes	Yes	Yes	No	No	No	Yes	No	Yes	No	Yes	No	No	No	No	No	No	No	No	No	No	No	Yes	Yes	No	No	No	No	No	No	No	No	No	No
Sensotrend	Early Stage	http://www.sensotrend.com/	Finland	Tampere	2014	Health & wellbeing Med tech & pharma	Going to market	Automated diabetes diary	Bringing quantified self apps and wellness trackers to healthcare setting, making it easier for people with diabetes to learn how different factors affect their blood glucose values.	Mikael Rinnetmäki, type 1 diabetic and a software professional for 16 years.Assi Rinnetmäki, healthcare PR and marketing professional for 8 years.Married to each other.	We make collecting data easy and fun, even fully automated. We concentrate on exercise, which is ignored by other apps for people with diabetes.	400 million people with diabetes, treatment costs $400 billion.Currently only 1 % of people with diabetes use any app in their treatment, estimated to grow to 8 % by 2018.	Competition: dinosaurs providing healthcare IT systems.	Got first end users, first sales to public healthcare organizations in Finland, started clinical trials.	More users through a public international launch,	No	Yes	No	No	No	No	No	No	No	No	Yes	No	Yes	Yes	No	No	No	No	No	No	No	No	No	No	No	No	No	No	No	Yes	No	No	Yes	No
Linkity	Early Stage	http://www.linkity.net/	Finland	Helsinki	2012	E-commerce & online marketplaces	Going to market	Resourcing and procurement combined	Dynamic procurement platform and a market place for services. You can get suitable and available resources right away or arrange bids for tasks need to be done.	Antti-Pekka Vepsäläinen, Antti-Jussi Mäki, Janne Tiri, Olli Rounaja, Tuomas Tynjälä	Worlds first dynamic procurement platform for services.	tbd	tbd	tbd	tbd	Yes	No	No	No	No	Yes	No	No	Yes	No	No	Yes	No	No	No	No	No	No	No	No	No	No	Yes	No	No	No	No	No	No	No	No	No	No	No
Eastwind Int. Trading Ltd.	Normal	http://www.ewitrading.com	Hong Kong	Hong Kong	2012	E-commerce & online marketplaces Cleantech	Going to market	We are Your partner to Asian market.	Our skillful team will help you to find best suppliers and manufacturers. We are continually looking for new product and product groups as well as manufacturers from Asia-Pacific market. Thru our wide network we always check the background , product quality and delivery reliability of new manufact	Founder of the company is Mr. Mike Keys and Mr. Joost Langbroek. Later Mr. Kimmo Riipinen has joined the company as Partner. Mr. Keys and Langbroek has wide experience markets in Asia and Europe. Mr. Riipinen is taking care of Scandinavia, Baltic countries and St. Petersburg area.	Main focus is to build network between Asia and Europe. We have investor connects and we look all kind of possibilities to find start-uo companies , which needs founding and contacts to Asia markets.	Europe and Asia, St.Petersburg , Russia	All consulting companies or investors	We like to find 10-15 new companies to invest next 12 months	Stabilize our business in Europe and work as an effective gate to start-up companies to Asia/ Hong Kong markets	Yes	No	No	Yes	No	No	Yes	Yes	No	No	No	No	No	No	No	No	No	No	Yes	No	No	No	Yes	No	No	No	No	No	No	No	No	No	No	No
Bizmind	Normal	http://www.bizmind.com	Finland	Helsinki	2014	Mobile Analytics, big data & AI	Going to market	Bizmind mob app is a personalized sales accelerator, improving sales intuition.	Bizmind converts your own and your peer groups' past sales cases into battle-tested instructions for your upcoming customer meetings, just on time, just before a new meeting. The relevant previous sales cases of both success and failure will be data mined on personal basis. Patent pending.	Manne Pyykkö: EuroPsy; work psychologist in EU & an entrepreneur for 15 years Teemu Huttunen: M. Sc (Tech), B. Sc (Econ); successful serial entrepreneur Joose Vettenranta: B. Sc (computer science); successful serial entrepreneur Angels & Advisors	"How to make the most out of the sales meetings and leads?" Our promise: More sales, less stress. Bizmind helps you to fine-tune your social approach and message to match the social style of the counterpart. You will connect more effectively with different customer types – and close more deals!	Estimated to be a $12.8 billion market (North America only), the sales acceleration software market today is roughly where the marketing automation software sector was in 2008 and 2009. The same study estimates that the North American total addressable market could exceed $30 billion by 2017.	1st competitor: Status Quo, i.e. companies "do nothing about it". 2nd competitor: Traditional sales funnel thinking with a strong quantity leaning. Bottom line: CRM is for sales management; Bizmind is personal sales enhancement. Further, we have a patent pending in the U.S.	Our co-creation customers: * Siemens * Pfizer * DNA * Alma Mediapartners * United Bankers * Veikko Laine	Est. CAGR > 150% for the next 18 months. Launching an international version for all three major platforms (IOS, Android, Windows Phone) in December 2015. App prototype/MVP is already launched for IOS, Android and Windows Phone (closed distribution in Finland only for our co-creation customers).	Yes	No	No	No	Yes	No	No	No	Yes	No	No	Yes	No	No	No	Yes	No	No	No	No	No	No	No	No	No	No	No	No	No	No	No	No	No	Yes
Team Jolly Roger	Normal	http://www.teamjollyroger.com	Finland	Kajaani	2013	Gaming	Going to market	Professional games for business and leisure.	We create experiences and expertise through games and gamification, keeping perfect balance between work for hire and our own IPs. Our best known product to date is Interplanetary, a turn based space artillery strategy game, available in Steam since April 2013.	Niklas Saari - CEO, Co-Founder Jussi Hyttinen - Programmer, Co-Founder Tarita Tammela - Graphic Artist, Co-Founder Teemu Tammela - Programmer, Co-Founder Antti Tikkakoski - Lead Programmer, Co-Founder	We create games and gamification projects for businesses. Our solutions are highly scalable to fit different demands and budgets, as well as various platforms. We also create entertainment focused games for gamers.	We offer specialized products to our B2B customes, making it hard to estimate potential market size. Our PC game Interplanetary are currently present in Steam digital distribution channel, which is the biggest digital delivery platform for our product type with 100M active users.	Our entertainment games compete for attention with every other game out there. We aim to pull ahead with relatively large emphasis on hands-on marketing in various channels plus keeping in contact with existing user base.	We established 125k revenue with our first fiscal year 2013-2015, 60% of which came from work for hire projects and the rest from Interplanetary sales.	As Interplanetary is reaching the 1.0 we expect it's sales to double or triple in the coming months. We also aim to get the next 2-3 smaller scale multiplatform game projects out this year. We also aim to scale up our capacity for work for hire.	Yes	Yes	No	No	No	No	No	Yes	Yes	Yes	No	No	No	No	No	No	No	No	No	No	No	No	No	No	No	No	No	No	Yes	No	No	No	No	No
Music.Info Finland Ltd.	Normal	http://musicinfo.io	Finland	Jyväskylä	2012	E-commerce & online marketplaces Enterprise software	Going to market	We are geeks and love music! We are a database and software developer.	Musicinfo is the world’s largest music database who aggregates forms of music metadata, over 600 datapoint categories of information; over 50 million songs, 10 Billion data points, 5 million artists, 500k record labels and other intelligence in form of remixes, cover songs and videos, etc.	Antti Jokipii, Founder, DJ and CTO: 10+ years experiences in ICT Platforms, metadata and management, from launch to exit. Kari Halttunen, Co-founder and CEO: 20+ years solid track record in business development and management, mainly in IT services. And 8 other international professionals.	3 categories of service. 1) Data Sales, 2) Music industry Business Integration 3) Consultation. We aggregate information and data from various sources. Own unique platform, algorithm and search engine. An ability to perform multilingual searches with Cyrillic, Japanese any other character set.	Music industry specifically media houses, radio stations and even public structures harnessing the large consumer groups of music. Currently, targeting Finnish market however ongoing negotiations held with 1st tier global business partners to develop products and for expansion.	The Echo Nest, Musikki, Allmusic by Rovi, Decibel and Gracenote are considered as the key competitors. The competitive advantage is the ability to perform multilingual searches.	The first year of turnover - estimated Eur120k through consultation services.	2016 first radio stations through business integration services - estimated turnover 450k.	Yes	Yes	No	No	Yes	No	No	Yes	No	No	No	Yes	No	No	No	No	No	No	No	No	No	No	Yes	No	No	Yes	No	No	No	No	No	No	No	No
Datavole Oy	Normal	http://www.datavole.fi/	Finland	Tampere	2015	Analytics, big data & AI Social media	Going to market	Social media analytics	We are developing social media analytics tool. We extract opinions, feelings and other from the data and make it more valuable information. Our target audience is media companies and others, who are interested what people are thinking about them in social media.	Tiia Leuhu, Technical University of Tampere Joonas Kemppainen, University of Tampere Tuomas Salmi, Technical University of Tampere Ville Toni, University of Tampere	Risuaita reports in real-time about how your own and audience's tweets are being delivered, who re-tweets them and whether the content is positive or negative. With Risuaita you will always know what people are saying about you. You can also make quaries and get the answers analysed.	Market area will be at first in Finland, in particular, the Helsinki metropolitan area. Markets are pretty fresh, and social media has grown exponentially. The expansion of operations abroad at some point.	TweetAtlas, Futusome, Big data solutions are our main competitors. Our competitive advantage is our web API. With it, user can analyse what they want and when ever they want.	We have just opened business at March and done two projects. We hope to increase the customer number to have key metrics.	Stragedy is to get as many interested customers as possible. This semester is for advertising, marketing and developing our business.	Yes	Yes	No	No	Yes	No	No	Yes	No	No	No	No	Yes	No	No	Yes	No	No	No	No	No	No	No	No	No	No	No	No	No	No	No	No	No	No
Priori Data	Normal	http://www.prioridata.com	Germany	Berlin	2015	Analytics, big data & AI Mobile	Going to market	App Market Analytics for App Developers, Publishers, Analysts and Investors	We use data science and tech innovation to shed light into the black boxes that are the Apple App Store and Google Play Store. This means that app developers, publishers, investors and consultants can make data-backed decisions on marketing, internationalization and investment.	Patrick Kane, Founder and CEO (INSEAD, Morgan Stanley, Vestar Capital Partners), Anders Lykke, Head of Sales and BD (Copenhagen Business School, Google), Michelle Tran, Director of Data Science (Cambridge, The Brattle Group), Janis Kesteris, CTO (Softgames)	Mobile market intelligence tool for app economy stakeholders - we provide download and revenue information for 55 key mobile geographies, as well as individual app and publisher level information, in a clean, easy to use interface. This means market, trend and competitor analyses are all possible.	500,000 app developers/publishers as well as mobile agencies, consultants, advertising networks,	App Annie (current market leader) - Strong on some markets, and is well funded, but prices are very high (reflecting 400 staff and nearly 100mm in funding). Our competitive advantage is our platform's ease of use and our data-for-data exchange model which our clients love.	Expansion of data network effect - more data means more accurate estimates which means more valuable product: 1500 apps tracked at Jan 1, now over 7000 apps tracked. Release of Google Play platform. Continued refining of estimation models.	Continued focus on increasing data quality and network effect by continuing to build developer and publisher relationships. Longer term focus on continuing to release valuable tools for app industry stakeholders.	Yes	No	No	No	Yes	No	No	No	No	Yes	No	No	No	No	Yes	Yes	No	No	No	No	No	No	No	No	No	No	No	No	No	No	No	No	No	Yes
Music Drive-In	Normal	http://www.musicdrivein.fi	Finland	Helsinki	2014	Music & entertainment Education	Going to market	Music eLearning toolbox - visual music learning moments for group teaching	Online service for music teaching with ca. 600 teaching items including videos, sheet music, tasks and exercises, links etc. MDI is targeted for group teaching in elementary schools. Teacher can create own teaching plan combining ready material with own ideas. Subscriptions can vary 3-12 mo.	Jenni Rahunen and Terhi Romu. Founders, Music educators (Master of Music) Olli Berg and Ari Nikula, software development Antti Kokkola, videographer Many professional musicians and music educators as guests in educational videos.	Learning is a holistic process where music and arts can be one core tool. We are presenting education material in a fresh and easy style e.g. giving tools to increase music making in classroom. At the moment material is in Finnish but we are looking for the way to expand the service internationally.	Market now: Comprehensive schools in Finland.	Big publishing houses that dominate the sales of textbooks in Finland. Traditional textbooks still have a big market in Finnish school system. Though eLearning materials are coming to the market, music as a subject is still in the margin.	Music Drive-In was founded in August 2014. We have customers all around Finland, at the moment ca. 80 schools. The first year has been a pilot year focusing on the content and developing the platform.	There are over 3000 schools in Finland. For the next period our goal is 200 per cent increase (i.e. 300 clients) through active marketing and visibility on the market. At the same time an international project, which is planned for 2017, goal is to reach 3000 schools through international launch.	No	Yes	Yes	No	No	No	Yes	No	No	No	No	No	No	Yes	Yes	No	No	No	No	No	No	No	No	Yes	No	No	No	No	No	No	No	No	No	No
Meetingpackage.com	Normal	http://meetingpackage.com	Finland	Helsinki	2015	Enterprise software E-commerce & online marketplaces	Going to market	Online marketplace that specialises in trading of standardised meeting packages.	Meetingpackage.com is a b2b online marketplace and venue search engine that specialises in trading of standardised meeting packages. Total transparency in prices and possibility to book online. Saves time and money for the supplier and the customer. Forget messy spreadsheets, lists and enquiries.	Joonas Ahola (Founder) has a background from the hospitality industry and event organizing as a entrepreneur. Saku Loukonen (Co-founder) has a background from advertising agency as a entrepreneur. Our board has wide knowledge of the market area and making businesses international.	Meetingpackage.com offers customers a new approach for booking offsite meetings. We have transparent pricing and possibility to book without enquiries. The service is free to use for the booking customer and commission based for the venue suppliers. Integrations with PMS and revenue management.	The global market for offsite meetings can be estimated as 70 billion EUR, while European market size is 38,5 billion EUR. We did in-depth market analysis 1Q 2015 with highly encouraging results. While there are some meeting venue catalogue providers, there is no comparable service in the market.	There are no dominant competitors yet, but globally there are local meeting venue list providers with enquiry options. Typically these services lack of transparency in pricing and ordering capability. The quality of pictures, ease of use and overall appearance are key differentiators for us.	We have strong traction in Finland in just 8 months. In 8 months we have got over 460 meeting packages to our web site in Finland (kokouspaketit.com). Average register fee for the venue suppliers has been 150-300€. And recently we have also started to convert service usage into orders.	..	Yes	No	No	No	No	Yes	No	No	Yes	No	No	Yes	No	No	No	No	No	No	No	No	No	No	Yes	No	No	Yes	No	No	No	No	No	No	No	No
Radiant Games	Normal	http://radiantgames.is	Iceland	Reykjavik	2014	Education Gaming	Going to market	Radiant Games creates playful coding games and experiences for children	Our mission is to empower children by providing the best playful coding experiences possible. We spark interest by crafting innovative coding games that engage through active participation. We ensure a trusted bond with parents through quality and integrity, where children learn as the play.	Vignir Gudmundsson (CEO), BSc. Mathematics & MSc. Computer Science from Reykjavik University (RU). Worked with NASA & QuizUp in his research. Other founders are Haukur Logason (Head of Games), Þorgeir Karlsson (Technical Lead), both BSc. Computer Science from RU and Gudmundur Vidarsson (Lead Artist)	Box Island is a logical puzzle game on mobile which introduces the basic concepts of coding to children. In the game, children journey with a family of boxes to find a lost baby box in a tropical wilderness (see: https://goo.gl/HLc635). Box Island will be released worldwide in November this year.	77% of parents in the US & UK believe interacting with a tablet helps their children develop creative thinking and gain problem-solving skills, with parents spending over $100 p. year in apps for their children (KidsIndustries). Game-based learning will be $2.4B in 2017 worldwide (Ambient Insight).	Current competitiors are for examples: Tynker, Lightbot, Hopscotch. Box Island solves many of the problems current logical puzzle games have. We introduce a simple story to promote a clear objective for children to participate. We also have a shorter feedback loop for children to maximize engagement	Founded in 2014. Started formally developing our first coding game, Box Island, last January. Box Island was soft launched for iPads in Iceland where it received a great amount of attention and reached the #1 in the paid and grossing lists. Worldwide release of Box Island will be in November.	During the next 18 months, we expect to scale our team to 10-12 people total, which includes hiring a CBDO, 3D Artist, Animator, Game developers to the team. The team additions are spurred from the estimated growth from our Box Island game, and will allow us to continue building great edu-games.	Yes	Yes	No	No	No	No	Yes	No	No	Yes	No	No	No	Yes	No	No	No	No	No	No	No	No	No	Yes	No	No	No	No	Yes	No	No	No	No	No
Crucible Associates SL	Normal	http://crucible-associates.com	Spain	Barcelona	2015	Industrial internet & IoT	Going to market	We deliver IoT and Smart City sales advisory services and ecosystem creation.	Crucible Associates have many years experience of creating and delivering sales enablement programs and activities for technology vendors and systems integrators. By understanding customers’ particular requirements, we can create and deliver customised sales training on a variety of subjects.	Andrew Wragg - An accomplished sales and technology leader who offers over 20 years’ experience within the IT and telecoms sectors, managing international sales businesses, driving multi-million dollar new business initiatives and leading the development and sale of industry leading technology solut	Our mission is to play a crucial role in the transformation of how Enterprise companies and the Public Sector apply IoT technology. Our aim is to create a strong and compelling link between technology and business outcomes through the value chain.	Enterprise and Public Sector	N/A	N/A	Customer acquisition, references.	Yes	No	No	No	Yes	No	No	No	No	No	No	Yes	No	No	No	No	No	No	No	No	No	No	No	No	No	No	No	No	No	No	Yes	No	No	No
Equivalentor Ltd.	Normal	http://www.equivalentor.com/	Finland	Helsinki	2015	Social entrepreneurship & Impact Analytics, big data & AI	Going to market	We engage talents.	Patent pending. Our solutions help build talent pipeline outside companies and benefit from the digital powershift between employees and employers. Focus is on those 99 candidates over 100 that do not become selected in each individual recruitment process. We aim global. Clever algorithms and A.I.	Saku Valkama (CEO) & Joni Latvala (Head of R&D and Market Op.) [Team] (4 pers.): Sales Mgr, Solution Designer, Head of Mktng & Comms, UX Designer [Advisory Board] (5 Sr. pers.): SVP in HR, Dep. CEO in IT w/ exit exp., Head of strategy (media), Partner in int'l law & Leading IT guru in Finland.	Patent pending. It solves one by one each bottle neck in the job application process. First app. launched enables a 100% personalized feedback to each candidate in only 10 sec. REALLY! The app. is based on a platform and intelligence that can be replicated to other domains with unlimited potential.	The target market for our first solution covers recruitment, communication, employer branding and marketing. Market is growing strongly and rapidly changing. Our initial target market is Finland, Scandinavia, Germany, UK, USA, Canada, Latin America. Rest of Europe and Asia will follow after that.	Talent Relationship Mgmt. is an established market with very fragmented solutions. Our first solution is unique and doing it manually is the main comp. Closest competing platforms in TRM require significant configuration. Ours is plug&play. Potential for millions of users vs. competitor's thousands.	We introduced the product to select customers recently. We have evidenced that as high as 90% or more of the companies we have visited have committed to either pilot the solution against a payment or buy a license once the first official version is available. First pilots sold. Solid deal pipeline.	We expect 0.5-1.5M€ in 2016. We continue selling select pilots and enterprise licenses & at the same time we launch a global online store. We are also negotiating partnerships within target markets. Product will be priced based on value. Ave. enterprise customer expected spend ~20-35k$ per yr.	Yes	Yes	Yes	No	Yes	No	Yes	No	No	No	No	Yes	No	No	No	Yes	No	No	No	No	No	No	No	No	No	No	No	No	No	No	No	No	No	No
RevoMedi Oy	Early Stage	http://www.revomedi.com	Finland	kotka	2015	Med tech & pharma	Going to market	We are appmakers, our apps saves lost of time and even lives	Is a technology company founded in 2014, that specializes in mobile software development. Our goal is to grow into a multinational service provider that focuses on saving: Money Time Resources Lives Environment	CEO: Pasi Töytäri +10years in ICT- Experience 4years Entrepreneur VP: Antti Willberg 5years Sales Experience Global sales network	112 App-serie saves lifes faster (112professional, 112SAR sea air rescue, developing together with Finnish Boarder Guard) B2B apps	Govenrments 20-50M € / year B2B 50-200M€ /yYear	Appstore random competitors Our advantage is Government as developing partner which gives us great trust level.	Partners: Developing product with Government, Finland Boarder Guard, SPR	Launching apps, 4/year, 112Sar in 2016 Q1	Yes	No	Yes	No	No	No	No	No	Yes	No	Yes	Yes	No	No	No	No	No	No	No	No	No	No	No	No	No	No	No	No	No	No	No	No	Yes	No
Elliot For Water Ltd	Early Stage	http://www.elliotforwater.com	United Kingdom	London	2015	Social entrepreneurship & Impact	Going to market	Elliot For Water is the search engine that allows you to save lives for free.	Elliot For Water is the first search engine that allows the users to save lives for free, simply by surfing the net.The company donates 70% of its profit to buy a solar energy based product that purifies dirty and polluted water and bring it where the people die from water related diseases.	Andrea Demichelis - Founder - BBA/MBA ESLSCA Business SchoolYannis Kolovos - Web Engineer - Long and worldwide experience in his fieldLaurene Gatti - Social Media Editor - MBA ESLCA Business SchoolVincenza Cornelli - CommunicatorCostanza Rivarossa - Marketing - BA Westminster	Elliot For Water created a new search engine.What differs us from the others is that we use 70% of our profit to bring safe drinking water to the poeple who need it.In this way the web users can surf the net and save a life for free and at the same time.	Elliot For Water's target is potentially everyone in the world with an internet connection and a device able to surf the web. This market is composed by 4.5 billions people splitted between the pc, smartphone, and tablet users. These potential targets have an average growth of 9% a year.	The main competitor in this field is Google, followed by Yahoo! and Bing.Our competitive advantage is that since is Yahoo! that provides us with the results, we can give their same qualitative service, but with the difference that the users are also contributing to save a life.	We will go online the 20th of May, so we do not have this data.	We have different goals: Reaching at least 2,000,000 searches per month, in three months; reaching at least 400,00 active users per month by January 2016 (the active user is the user who makes at least 15 searches per month;) having a growth of searches per month of 15% a month for the first year.	No	Yes	No	No	No	No	No	Yes	Yes	No	No	Yes	No	No	No	No	No	No	No	No	No	No	No	No	No	No	No	No	No	No	No	No	No	No
Transcense	Early Stage	http://transcense.com/	United States	Berkeley	2013	Analytics, big data & AI Social entrepreneurship & Impact	Going to market	Realtime speech to text transcription for group conversations.	Transcense lets you understand ‘who’ says ‘what’ around you, by leveraging people’s smartphones and translating speech to text. We’re Siri for group conversations, with a focus on a very specific use case. We aim to help 360M deaf and hard of hearing people understand and participate in groups.	Transcense is a team of three co founders, Thibault Duchemin, a data scientist (CODA) from France, Skinner Cheng, a (deaf) software developer from Taiwan, and Pieter Doevendans, a civil engineer from The Netherlands (learning ASL).	We collect many hours of natural conversational data from the people around the deaf person, allowing us to train our system and create personalized speech profiles that perform much better than Google’s and Apple’s speech engines.	It's a $4.1B market in a completely broken industry with no real solution to these everyday social and professional issues. This market happens to be the perfect entry way into much larger markets like conference calling, business meetings ($7.5B), and even language translation ($45B).	There is the $4.2 B/year hearing aid industry (with only 20% penetration). Hearing aids cost between $3000-7000 dollars. Then there are captioners and interpreters who cost $100 per hour. No solution today solves the group problem and brings autonomy to the deaf or hard of hearing user.	Launched beta product on Android, tested with first group of 100 beta testers. Indiegogo campaign with 450 backers buying the product (pre-sales) up to $250 dollars worth. Build a web app and core iOS app to be launched soon. Closed seed round very recently.	Growing the team with 4 engineers and someone on the sales and marketing side. Testing the product with 500 people and improving the product until launching the full iOS and Android app at the end of 2015, to acquire 60.000 users by the end of 2016.	No	Yes	No	No	Yes	No	No	No	No	No	No	Yes	No	Yes	No	Yes	No	No	No	No	No	No	No	No	No	No	No	No	No	No	No	No	No	No
Gamurs Pty Ltd	Early Stage	https://gamurs.com	Australia	Sydney	2015	Gaming Social media	Going to market	The Facebook for Gamers	GAMURS is a social network helping passionate gamers share their content, meet like-minded players, and keep up to date with all their games, in one site. GAMURS is a dedicated network catering solely to gamers looking to connect with each other.	Riad Chikhani (CEO): Founded first gaming business at 14, sold at 17 with 16,000 members and 5M annual pageviews. George Amine (Product Mngr): Ran and exited digital media company Phillip Luu (Gaming Analyst): Life-time gamer with industry know how	Users can connect their Xbox Live, Steam and PlayStation Network accounts to show off all their achievements. They can also share their content (photos, stories, achievements, etc) using Facebook style social features, while engaging with any game-content from around the world.	$1.1B global game advertising market. Advertisers go to Facebook & Google to reach a gaming demographic, although that's not accurate. We can accurately pinpoint a gamer to the game they were playing an hour ago - nobody else can reach this level of detail.	Player.me: More of a linkedin for gamers. Lacking scalable technology. Duxter: Redundant and old technology, no market growth whatsoever. PlayFire: The incumbent, although was complacent and stopped innovating. Our competitive advantage: An intrinsic understanding of the market!	Launched for 3 months privately with BETA and seen over 4,500 members sign up with minimal advertising whatsoever, other than building our Facebook community.	Aim of 100,000 users by the end of the year, and approximate growth to 500,000 by end of 2016.	Yes	Yes	No	No	Yes	No	No	No	No	Yes	No	No	Yes	No	No	No	No	No	No	No	No	No	No	No	No	No	No	No	Yes	No	No	No	No	No
Intui Travel	Normal	http://en.intui.travel	France	Annecy	2014	Transport & automotive E-commerce & online marketplaces	Going to market	GDS&solution for integration PERSONAL TRAVEL TRANSFER into dynamic packaging	Intui this is GDS of transfers. On the one hand are connected to GDS a land carrier companies from the 1st level of prices with its fleet, on the other hand the project is Affiliates Network with API for integration Transfers into Cross, Post sales of Travel sites and dynamic packaging for OTA	Our team has the competence to work in the field of software for IT B2B tourism and is able to generate ideas for the development of non-trivial solutions and implement them. CEO, Founder 19 years in business,14years as CEO&CTO in tourism in CRM,ERP for b2b	Our GDS system for Transport Suppliers can sell the its transfers Worldwide via IntuiGDS We have unique algorithm that is can to integrate the Relevant transfer into postcrosssales of any Travel booking systems Customers can Planning Transfer hassle out at advance to any target point over the worl	1) 12% of users want to book the whole trip using one website 2) 51% of them is important to solve a task with getting from Arrivals to the Hotel 3) Travel websites are looking for ways of offering relevant service & value their customers. OTA, Hotels, Airlines want to raise the average bill.	Competitors Iway HolidayTaxis FoxTransfer. They can match Airport with City only! Intui is compose transfer from ANY Airport/station to ANY Hotel/Villas with big list of suppliers,165 type vehicles. Largest covering on today is 113 countries. Our solution is eatable for OTA, Hotels, Airticket	Our achievements: launched HUB for b2b. Orgainc indexed pages is 5M. Conversion increased from 0,01% to 1,3%. New customer +55% Satisfied customers 97%. Turnover +50% monthly!	Attract more than 500 Transport Suppliers to Intui GDS. Then increase the number of routes. Enlarge our distribution network. We will up the conversion + 0,05% monthly and we involve new customers + 10% monthly. Turnover + 90% monthly	Yes	Yes	No	No	No	Yes	No	No	Yes	No	No	No	Yes	No	No	No	No	No	No	No	No	No	Yes	No	No	No	No	No	No	No	No	No	No	No
VP9 VIETNAM	Normal	http://www.vp9.tv	Viet Nam	Hanoi	2015	Communications & media Consumer electronics	Going to market	VP9VN is the startup to provide video streaming products and services	VP9VN is founded to commercialize an algorithm to improve video codec (by improving PSNR/SSIM). The algorithm has been peer reviewed by VN Ministry of Science and Technology, project FIRST sponsored by World Bank. The re resulting streaming platform is superior: smaller data, smooth, cost less bw	1. CEO-Nguyen Dinh NAM (1981): Fouder, author of an algorithm to improve encoding process of video coding standards (H264, HEVC, VP9), started programming since 1992, won many national awards 2. COO: Quang (1984) - worked with Nam since 2006	VP9 selling video streaming platform, app/web, paid subscriptions which support all major devices (TV, phone, PC). Our streaming platform use least bandwidth, less storage, less buffering time, scalable in low budget servers; having satisfied users (4.6*) in 100+ countries	- Under served: 200m expats worldwide: Chinese: 50m; Indian: 25m; Filipino: 13m; Indonesian: 5.3m; Pakistan: 5.8m; Bangladeshi: 5.7m; Vietnamese: 4m - Surveillance camera: $25B/year (est.) - Telepresence Video Conference products and services: No data	Our advantage in video streaming market is better video quality and smaller size: - Encode real time video stream using commodity PC or embedded system - Use less bandwidth: less than 50% of youtube - Less storage/network cost; - Less buffering time; - Horizontally scalable on low budget servers	In 3 months after launching TV streaming service to Vietnamese overseas, we have 30000 subscription, 10% paid. In 2 months after showing the demo of IP camera streams to friends on Facebook, the company got contracts to install 1000+ camera without paying for advertisement yet.	Next 18 months: serving 70% Vietnamese expats; clone to others expats worldwide such as Chinese, Filipino. Sell IP camera products Sell Telepresence Video Conference products and services	Yes	Yes	No	No	No	No	No	No	Yes	No	No	No	Yes	No	No	No	No	No	No	Yes	Yes	No	No	No	No	No	No	No	No	No	No	No	No	No
CrownCloser - MobiLion	Early Stage	http://www.crowncloser.com	Finland	Helsinki	2015	Enterprise software Mobile	Going to market	All the info updates automatically from your mobile to your CRM	CrownCloser mobile app finally ties sales to CRM - automatically. It auto updates sales activities from your mobile phone to the company CRM - setting the sales people free from annoing CRM filling duties and making the high CRM investment worthwhile.	CEO, Matti Haramo, MSc.(econ.) - Experienced entrepreneur, two exits (resent OrangeContact sold 2007 - founding partner and CEO – exit value 4 million)CTO, Mika Häkkinen, datanome - Experienced software developer (over 20 years - former founding partner and CTO of OrangeContact)	CrownCloser makes B2B sales so easy and so much more efficient. Our typical customer comments have been:“This is how the sales should always have been done.” "We have seen a lot but this is good.""Looks too good to be true.""Have compared many of these but yours is the best"	Gartner says that 80% of all sales activities never end up to the CRM. CRM and sales assisting systems spending’s is over 24 billion USD annually with yearly growth of 14%. There are around 30 million B2B sales people around the world.	Our main competitors will be CRM makers own mobile apps. The usability from sales people point of view is far from ours but they have the customers. Our competitive advantage is that we have build and thought everything from mobile sales person's point of view not just handling static customer info.	We launched the product for our piloting customers this spring (from small to public companies). According to those pilots we are introducing now in Slush our brand new version called "CrownCloser - for closers only!" Several new customers are already waiting for the new CrownCloser client.	Testing and fine tuning the concept in Finland will be done during 2015/2016. Starting to deploy globally 2016. Revenue target 2016 450.000 USD and 2021 over 100 million USD.	Yes	Yes	No	No	No	No	No	No	Yes	No	No	Yes	No	No	No	No	No	No	No	No	No	No	No	No	No	Yes	No	No	No	No	No	No	No	Yes
Valossa	Early Stage	http://valossa.com	Finland	Oulu	2015	Analytics, big data & AI Communications & media	Going to market	AI-powered video search. Apple tvOS search - we do it for everyone else.	Valossa is a spinoff of the Oulu University (officially launched 10/2015), following 4 years of full time Uni. R&D. Today we have offices in Oulu & Palo Alto, are in talks with undisclosed market leaders. Patent pending. Winners of Midnight Pitch Fest 15	Mika Rautiainen (Senior Research Fellow @ Uni. Oulu, father of the technology - CEO)Harri Pesola (Seasoned entrepreneur)Ville Hulkko (Commercialisation, former Founder at Raknar Oy)Otso Kassinen (Chief Architect, PhD)	We enable search through natural language descriptions ("Movie where a boy learns he's a wizard" -> Harry Potter 1). We disregard the superficial meta layers and analyse the heart of the video itself; patterns, audio, transcripts, web references. Automated, machine learning, proprietary NLP.	Every major TV Middleware provider (Cisco, Ericsson, Arris) - Every SmartTV / Set Top Box provider (LG Electronics, Comcast, Samsung) - Every OTT video vendor (Amazon Instant Video, Roku, Youtube Movies) - Every Voice Control / V2T operator (Alexa, Nuance, Siri, Cortana)	VionLabs in Sweden (our search reigns superior)ThinkGlue (focus on video analytics)	We grew from a Finnish demo site (KuukkeliTV) to advanced tech demo whatismymovie.com, beating commercial video searches (Amazon, Youtube Mov., Google Play) by 10x, Bing by 5x and Google by significant proportion, pre-launch. We've refined our algorithm, integrated new data feeds and filed a patent.	We are working to close our first customers as we continue to refine our search algorithms. We recently opened a new office in Palo Alto.	Yes	Yes	No	No	Yes	No	No	Yes	Yes	No	No	No	No	No	No	Yes	No	No	No	Yes	No	No	No	No	No	No	No	No	No	No	No	No	No	No
GameLayer Oy	Early Stage	http://www.gamelayer.co	Finland	Helsinki	2012	Gaming	Going to market	Helping companies engage with their users in new ways.	We use game mechanics in non-gaming services to make them more engaging for users. These gaming 'snacks' provide new engagement opportunities and are proven to drive loyalty and retention from users, amongst other business objectives.	Steven Judge, Founder & CEO - 15 years in mobile games industry (Digital Chocolate, Vivendi, Nokia)Gerard Bosch, Co-Founder & CTO - 12 years developing large scale software systems and gaming APIs (Nokia)Stuart Wells, Advisor & CMO - 15 years working with partners and brand (Nokia, Various)	SNAP! is a gamification platform comprising an easy-to-use web interface and API library. SNAP! is used to power Veikkaus Points (www.veikkaus.fi/veikkauspoints) a gamified loyalty program for the Finnish National Lottery. We offer a hosted and managed service to keep it lightweight for customers.	Digital service (and App) providers that want to engage their user base more deeply or motivate their behaviour in a particular direction. The market opportunity cuts across many industries (entertainment, health & wellbeing, education, financial services, for example).	Competition mostly US -based (Badgeville, Big Door, Gigya, Bunchball) but the concept and use of gamification is spreading. Recently the Finnish company FutureFly announced $2.5 seed funding for a gamified messaging app (not launched).	We launched with Veikkaus (the Finnish National Lottery) and secured monthly revenue.	Add 15-20 new enterprise accounts and 75-100 basic accounts. We will also launch a free tier to our service at Slush aimed at start-ups. We anticipate 750-1000 free accounts.	Yes	No	No	No	No	No	Yes	Yes	No	Yes	No	No	No	No	No	No	No	No	No	No	No	No	No	No	No	No	No	No	Yes	No	No	No	No	No
LiquidBlox	Early Stage	https://liquidblox.com	Finland	Espoo	2015	E-commerce & online marketplaces Communications & media	Going to market	Create beautiful online brochures, catalogs and magazines in minutes.	We are a digital agency founded in 2012. Early years we have made digital publications as tailored work for our clients. In 2014 we started working on LiquidBlox providing the world means for making digital magazines, brochures and catalogs in minutes.	Jani Hiltunen (Founder, CEO) | Santtu Puurunen (Partner / CTO / Programmer) | Hannu Pekka Hakamäki (Cloud Architect, Back End Developer)	LiquidBlox allows anyone to create beautiful digital Brochures, Catalogs and Magazines in minutes. No coding required - LiquidBlox publications work on all devices and are optimized for social media and search engines.	Market size is estimated to be 283M€ in Europe and 69M€ in USA.	Main competition is plain PDF files, flip page applications and doing nothing. None of this competition can evolve to same kind of full blown HTML5 solution as LiquidBlox provides. In native HTML5 publication software there is a company called Ceros. Their solution is quite different from ours.	We are still developing the product.	After launch by the end of 2016 we will have 50000 freemium users.	Yes	Yes	No	No	No	No	No	Yes	No	No	No	No	Yes	No	Yes	No	No	No	No	Yes	No	No	Yes	No	No	No	No	No	No	No	No	No	No	No
TabTrader	Early Stage	http://www.tab-trader.com	Netherlands	Amsterdam	2015	Financial & payment services Mobile	Going to market	TabTrader is world's first bitcoin broker	Imagine you are a crypto-currency enthusiast holding different coins and trading them. You have accounts on multiple exchanges. TabTrader allows tracking and trading the crypto-assets on major exchanges from a single mobile interface. Fast price charts with technical indicators, drawing and trading.	Kirill Suslov - CEO ru.linkedin.com/pub/kirill-suslov/22/6a6/563 Denis Suslov - Business development director uk.linkedin.com/in/denissuslov/ Kirill Yashchuk - CTO ru.linkedin.com/pub/kirill-yashuk/26/985/948 Yaroslav Madarakh - Chief architect ru.linkedin.com/pub/yaroslav-madarakh/39/4a/682	TabTrader allows tracking and trading the crypto-assets on all major exchanges from a single mobile interface. Fast price charts with technical indicators, drawing and trading directly from charts. Price alerts by push notifications. Newsfeed from Reddit, Coindesk, Bitcoin Magazine.	TAM: 100 bln There are circa 100 bitcoin exchanges worldwide with $300 mln/day turnover, collectively earning $600k/day in commissions. Our attainable market is 60 exchanges. Total number of bitcoin traders in the world is around 1 mln people growing 200% pa.	Our app is free and has most exchanges connected BTCFX http://www.btcfx.ch/ 10K+ downloads zTrader https://play.google.com/store/apps/details?id=co.bandicoot.ztrader 1K-5K downloads Cointra http://www.unicoinex.com/ 500-1K	15,000 downloads 175 DAU 1000 MAU $35 mln orders placed thorugh our system 4.6* rating on Google Play, the highest rated bitcoin related app on all Google Play	iOS and web version to reach $100 mln order volume on 30 exchanges in 20 countries. Extensive value added marketing combined with cross promotion on connected exchanges.	Yes	No	No	No	No	Yes	No	No	No	No	No	No	No	No	No	No	No	No	No	No	No	No	No	No	No	No	Yes	No	No	No	No	No	No	Yes
Glome OY	Early Stage	http://glome.me	Finland	Helsinki	2012	E-commerce & online marketplaces Industrial internet & IoT	Going to market	Connect all things - forget the login.	Glome is a unique service for businesses to personalise their offerings and serve users in real time across multiple devices. For users we enable a frictionless way to get service from businesses any time and from any device - nothing is required from users: no registration, no apps to install.	Edvard Immonen, CEO - creative technologist from world of business and marketing. Ferenc Szekely, CTO - architect and developer from world of messaging, security and scalability. Antti Venetpalo, designer - user experience from world of gaming.	Glome is a SaaS company. We offer a service with a RESTful API to help businesses earn users trust by serving them across multiple devices with no forced registration or identity requirements.	Analytics&BigData market is 135B and the CRM market is 30B. The privacy megatrend is shaping these industries, and Glome is the solution for the right to be forgotten and anonymous personalisation in the connected world.	Glome has an unique technology (patent granted) and business model - no direct competition has yet been found as we operate without identity requirements.	We are now in pilot phase and have proven the business model with revenue - proof of business. We are now about to open the markets.	We promise to improve conversion, user acquisition and retention. The next months will be used to get numbers for proof and then we start scaling. The API is tested and we are creating products on top of the Glome API to help businesses and developers to integrate us faster.	Yes	No	No	No	No	No	No	Yes	Yes	Yes	No	No	No	No	No	No	No	No	No	No	No	No	Yes	No	No	No	No	No	No	No	Yes	No	No	No
Payment Highway	Early Stage	https://paymenthighway.fi	Finland	Helsinki	2015	Financial & payment services Mobile	Going to market	Enabling new digitalized business models with an easy card payment solution.	We help digital businesses to solve their payment problems by providing them with an easy and flexible card payment service for mobile and web applications as well as e-commerce platforms.	Pekka Koskinen is a serial entrepreneur, chairman of board at Solinor Oy, our parent company. Sami Karhunen is a payments visionary, networked in the payments industry, developing our product and business. Arno Hietanen is the team lead and team developer, held various tech team lead positions.	Payment Highway is a card payment service for mobile and web applications as well as e-commerce platforms. We allow our customers the maximum flexibility by letting them handle all user information, authentication and the means of initiating a payment transaction.	Companies with new business models, where a smooth payment in mobile and web apps is a critical feature. We have started in Finland and are extending our technical capabilities in 2015 to support business expansion in Europe.	Our competitors are ecom card payment solution providers. The important ones are Stripe and Braintree Payments. Our biggest advantage is our slimness. We concentrate purely on the transactions, not for example on user authentication or handling money. We allow our customers the maximum flexibility.	Payment Highway was launched in February 2015. We have increased our transaction processing amount 340 % in the last three months.	We will provide customers with easier on boarding to our service and to acquirer services through a single sign up. We will expand online marketing to target small and medium customers in selected European countries and segments. We will further simplify our technical integration to the max.	Yes	No	No	No	No	Yes	No	No	Yes	No	No	No	Yes	No	No	No	No	No	No	No	No	No	No	No	No	No	Yes	No	No	No	No	No	No	Yes
KidED	Early Stage	http://www.kided.co.uk	United Kingdom	London	2015	Education	Going to market	KidED brings a unique way how to engage children with education	Children waste far too much time on smartphones and tablets. Time that could be spent doing something useful. KidED has a solution. A clever app that runs on the background of other activities and pauses the ongoing activity at pre-set intervals overlaying the screen witheducating questions.	Founder - Martti Luik CEO Maiko Arras – Product Development Manager (6 years experience,Moblet) Indrek Kõue – Android Developer (10 years experience; Davis Nore – Illustrator (10 years experience), Tom Osborne - Chief Marketing Officer ( Over 6 years experience), Reimo Õun - Animator	Our method is very simple – by activating KidED the application starts running on the background of kids' screen-time activities, after preset intervals KidED pauses ongoing activity, regardless of what it is, and overlays the screen with a quiz to be solved.	2015 Game based learning market is estimated 2 billion dollars and in the 2018 it will be 2.4 billion dollars. Our estimated target group globally is 80million children who have access to Android devices.	We're currently the only educational application on the market which targets to incorporate educational quizzes and tasks into kids' other activities on the device. Competitiors: SkillsPixels, Hopster, Tiggly, Zoodles, TinyBop, Fingerprint.	In the beginning of January, 2015 we released alpha version in Estonia. In first month we got 2700downloads and retention rate was over 60% over 3 month period. With alpha we made just proof of concept to get feedback about our solution. Feedback was utterly positive and we decided to develop beta.	In the beginning of august we will release our beta version in UK and Estonia. In first three months our milestone is to get 5000 active users. At the end of the 18 months we will have 75 000 active users. Mainly via educational institutions to make effective marketing to parents.	Yes	Yes	No	No	No	No	Yes	No	No	Yes	No	No	No	Yes	No	No	No	No	No	No	No	No	No	Yes	No	No	No	No	No	No	No	No	No	No
Closr	Normal	http://www.closr.io	Sweden	Uppsala	2015	Mobile Social entrepreneurship & Impact	Going to market	Closr - A personal relationship management app by Cloapp	By adding text notes, voice memos, last met locations and reminders to your contacts, and then combining it with the cloud-based information available from social networks, Closr really delivers on the promise to get you closer to your contacts - and to close more deals.	Alex Lewerentz, CEO (42) - Former product manager at Rebtel. Working with apps and CRM for 15+ years for H&M, IKEA, Telia Sonera IC. Peter Eriksson, CMO (52) - Swedish serial entrepreneur and former sales manager at Microsoft Sweden for 7 years.	By adding text notes, voice memos, last met locations and reminders to your contacts, and then combining it with the cloud-based information available from social networks, Closr really delivers on the promise to get you closer to your contacts - and to close more deals.	Free for personal use - consumer mass market Monthly subscription model for SME, sales teams, organisations	The competition is a blend of Linkedin and Facebook, spiced with Salesforce and Dynamic CRM. Our competitive advantage is the simplicity, we have a great looking app and a name that sticks. We are independent from the big companies on a market that is moving toward niched, best of breed players.	We have 200+ real users right now, with 350 more signups for early access. We launched in mid August, and we aim to get 100.000 users by the end of the year.	We have a combined online marketing and event-strategy meaning we will spend a lot on social, and at the same time back it up with physical campaigns and we have already secured 4 events where we will be official MINGL-partner. Metrics 2015 100.000 users 2016 1.000.000 users 2% business users	Yes	Yes	No	No	No	No	No	No	Yes	No	No	No	No	Yes	No	No	No	No	No	No	No	No	No	No	No	No	No	No	No	No	No	No	No	Yes
Zemeho	Early Stage	http://www.zemeho.com	Finland	Oulu	2015	Music & entertainment Gaming	Going to market	Developer of [valinta] streaming music plugin/service for game and app studios.	Zemeho, founded in 2015 in Oulu, Finland, offers solutions for the application and game developers. The solutions are designed and developed by mixing today's youth with seasoned tech professionals. Reasoning on mixing is the time again proven fact that youth know months ahead what’s in or out.	River Boche: Founder - Entrepreneur and International Mob Software Guru, Kimmo Kuusipalo: Founder - Biz Director Guru, Matti Mäkelä: Partner - Front-end Guru, Dean Boche: Founder - Concept Designer, Youth and Pitching Guru, Jarkko Paalanen: Board member - Adviser + Board Member at Fingersoft	Valinta is a service for app developers. A simple plugin adds unlimited free music with only a few lines of code to use real quality music in the game. Valinta keeps people using the app longer and shares revenue with developers and music industry for monetizing the new service.	Global mobile game and app developers. 3.3M registered Unity developers, 1M mobile. 1BN mobile consumers reachable. Finnish mobile games alone reach >0.5BN users.	Original music licensed by developer vs Valinta unlimited variety of music Proprietary streaming plugin (e.g. Spotify) vs Valinta no account needed nor several stream providers.Music player in the background vs Valinta developer has control and can generate revenue from music in background.	Presented concept at Slush2014- great feedback.Full team on board both biz and tech wise.Created prototype. Backend integration completed.Fingersoft 1st partner bringing on 300M gamers, also to company board.1st seed investment acquired.Tekes Skene Funding granted- KKS. 10 gaming partners joined.	Partnering with 25 app developers for beta testing.Plugin to developer stores Q3.Create 1st version of the service for 1-2 M users.Acquire 150k€ angel and 150k€ public funding to speed up.Standalone app 1.0 developRecord labels and music service partnering	Yes	Yes	No	No	Yes	No	No	No	No	Yes	No	No	Yes	No	No	No	No	No	No	No	No	No	No	No	No	No	No	No	Yes	No	No	No	No	No
sdafasdkj	Normal	http://www.mihamiha111.com	Slovenia	Maribor	2014	Health & wellbeing	Going to market	safdsafgsdagsdfgdfhgdf hmnbds jg hdkh? fs hkh?sjkah fh hiai sohd oI	Spletni ra?unovodski program miniMAX je preprosta rešitev, ki omogo?a podjetnikom in ra?unovodjem 100 odstotno usklajenost prek spleta in, da imajo so?asno vedno na voljo najnovej Za delovanje uporablja najmodernejše varovalne mehanizme. Vsi poslovni podatki so zaš?iteni z z	Tomaž Mileki? Miha Tomi	Glavne koristi pri uporabi miniMAXa Prikaz najpogosteje uporabljenih funkcionalnosti za podjetnike Odgovori na vprašanja udeležencev miniMAX za ra?unovodske servise in podjetja, ki sama knjižijo Odgovori na vprašanja udeležencev	Eu	No	120%	!30%	Yes	No	No	No	Yes	No	No	Yes	No	No	Yes	No	No	No	No	No	No	No	No	No	No	No	No	No	No	No	No	No	No	Yes	No	No	No	No
Kindgine	Early Stage	http://www.kindgine.com	Czech Republic	Prague	2015	Social entrepreneurship & Impact	Going to market	A Mobile app where people take pics, share them as Postcards, and make an Impact	Kindgine is a mobile app allows tourists send their pics as Printed Postcards to their Family & Friends, or even themselves, and collaborate with 1 $ per Postcard for a Social Cause. We provide unique souvenirs to the tourists and they give a little of money for a Local Social Cause.	Ricardo Monagas, Android Development & Business Operations. Mohamed Saheli, Business Operations.	People will be able to buy unique postcards with their own pics and share their travel moments with their families and friends in a more meaningful way than social networks.	We are starting at Prague. The city receives approx. 500.000 tourists per month.	Our competitors are: - Ink Cards (https://sincerely.com/ink) - Postagram (https://sincerely.com/postagram) Our competitive advantage goes related to the idea people will get unique souvenirs and collaborate with a social cause. Being part of an unique community which wants to support causes.	We just released at the end of march. Our key metrics are: - Number of sent postcards per month. - Frequency of use.	Our strategy is: - Have presence at the local hotels in Prague to promote our app among the tourists. - Get feedback from the community to improve the app. - Have presence at Twitter and Facebook through travel bloggers.	No	Yes	No	No	No	No	No	No	No	No	No	Yes	Yes	Yes	No	No	No	No	No	No	No	No	No	No	No	No	No	No	No	No	No	No	No	No
Rivet-APP	Early Stage	http://www.rivet-app.com	Hong Kong	Hong Kong	2015	Social entrepreneurship & Impact Education	Going to market	Rivet is YOUR crowdfunded productivity booster to focus on your essential tasks!	Rivet is an app that monitors the time you spend on Social Media, motivating you to only spend your time on there in a productive way. You can accept a Rivet Challenge, where you pay a small fee if you go above your own set time limit, but if you stay beneath the limit, Rivet will pay you!	http://www.rivet-app.com/the-rivet-team/ Dr. Julian Hosp: Medical Doctor and Entrepreneur Evan Grossman: Front-End Developer Toby: Back-End Developer Paul: Graphic & Design Bettina: Marketing & Customer Service	Plain app blockers are boring and inefficient. Instead of letting them help you, people start trying to find ways how to work around them. In Rivet we work with positive motivation, so that people get a small bonus to maximize their efficiency.	Asia, US, Europe	Various App Blockers	Just launched	Target: 50,000 Active APP User	Yes	Yes	No	No	No	No	Yes	No	No	No	No	Yes	No	No	Yes	No	No	No	No	No	No	No	No	Yes	No	No	No	No	No	No	No	No	No	No
Gazohim Techno LLC	Normal	http://www.gazohim.ru	Russian Federation	Moscow	2011	Energy	Going to market	Innovative gas processing technology	Cost-eefective technology for processing APG into synthetic oil has a process flow that involves catalytic partial oxidation of hydrocarbonaceous gas (APG, NG) by using atmospheric oxygen to obtain synthesis-gas consisting of carbon oxide and hydrogen to enable its conversion into synthetic oil.	Sergey Dolinskiy, PHD Chemistry - Formerly: the head of the Laboratory of Synthetic Fuel of the Fossil Fuel Institute, research member of Institute of Organic Chemistry of the Russian Academy of Sciences, Director of research and innovations of some design institutes, coauthor of the ??? technology.	THE SCOPE OF APPLICATION OF THE MINI-GTL™ TECHNOLOGY IS DETERMINED BY ITS VIRTUES AND ADVANTAGES. It's small, have a modular design, cost-effective and clean technology for oil and waste management companies. Using this process is the best and most profitable alternative to the conventional variants	Our market is oil, gas and waste management companies. Our estimation that global market - is around $20 billions, it's huge. Our solution is waiting by customers, we have already a dozens of preorders.	Our main competitor and partner at the same time is Velocys plc. Our unique advantages that our decision is cheaper and very flexible for customers demands.	Controlinng of costs and preoders. CAPEX of our solution is not changed during engineering, quantity of preoders is growing.	Our main goal is finish of our serial plant to prove our technology in conventional size.	Yes	No	No	Yes	No	No	No	No	No	No	No	No	Yes	No	Yes	No	No	No	No	No	No	No	No	No	Yes	No	No	No	No	No	No	No	No	No
Luxbright AB	Early Stage	http://www.luxbright.com	Sweden	Mölndal	2015	Biotechnology Med tech & pharma	Going to market	Nano based X-Ray Imaging: Less radiation, portable, energy efficient microfocus	Luxbright x-ray tubes can operates at cold temperatures which allows it to take images while exposing the patient to up to 30% less radiation. Luxbright tubes also have the capability to create whats called microfocus resolution, which offers improved image quality in many areas of medical imaging.	Gregory Carson Acting CEO Dr. Qiu Hong Hu CSO Eric Bronstein Farhad miri Cris Labra Rodriguez Johanna Ojala	FMF 40 Xray tube that is created from field emissions using nano technology and enables a 40 micron focal point FMF 25 xray tube that is crated from field emissions using nano technology and enables a 25micron focal point MF 40 xray 40micron low rad, low power load MF 25 xray 25micron low rad,	Xray imaging and xray source tube makers. 2bn a year in revenue. *only medical, not including security, industrial or geological	Dunlee, Varian, other innovation companies not yet on market. our competitive advantage patented technology uses extemely durable nano material 30% less radiation to patient 1000x faster rise time, pulse capability extremely high powerload, and low energy capable.	we have been R&D, we have created 3 iterations of prototypes, and have our first customer about to transact with us. We are in talks with large device makers as well, including GE Healthcare, and other large playes.	We plan to scale up, and have our first customers in mini/carm makers, as well as have sold several hundred of our microfocus replacement product. next year we plan to have significant sales and be the reference design source in at least one major imaging device. we have 5 more patents in queue	Yes	Yes	No	No	No	No	No	No	No	No	Yes	Yes	No	Yes	No	No	Yes	No	No	No	No	No	No	No	No	No	No	No	No	No	No	No	Yes	No
Thingthing LTD	Early Stage	http://www.thingthing.co	United Kingdom	London	2015	Mobile Communications & media	Going to market	The fastest way to share your content while chatting and emailing	We are doers. Designers, coders and marketers. A small team that loves to build stuff that people really want to use. We work together because we share a common belief: content should always be accessible in the easiest possible way. No distractions, no complications.	- Olivier Plante (@oplante): CEO & Co-founder - Jose Bautista (@_btsta): CDO & Co-founder - Francesc García (@fgojalvo): CTO - Xevi Farrarons (@xfarrrarons): Senior Developer	Thingthing Keyboard is a wide open door to all your content. A keyboard that is more than a keyboard. It gives you a fast access to everything you need when you are using your messaging or emailing app, and this without ever switching apps.	Our market is huge. We chat and email an average of 23h per week and we have an average of 100+ apps on our smartphone. Now, in mobility, you often need to work and these workers are actually the ones we are focusing on. We call them digital professionals and they love using their iPhone.	Fleksy, FannyPack, KeyFeed, Etch have all something similar to us in part. They mainly have one feature of Thingthing. However, we offer a more familiar experience but an organized one. If you use Thingthing, you'll have one keyboard for all your stuff. We basically the App Store of keyboards..	For the past 12 months, we have changed a lot. Now in the pre-launch phase, we can say that we have this data for 7 days of users (9th Aug - 15th Aug): Beta users: 580+, Returning users: 64%, shared content: 5000+. Launch is scheduled for Sept. 1st.	We are now pumping the media, we have influential PH subscribed to our waitlist, TNW CEO as well, GearDiary, VentureBeats, The Verge, Macworld, TNetc..they are all lined up for our pre-release. Then, it will be about creating partnerships and increase our user base. And multiple marketing campaigns.	No	Yes	No	No	Yes	No	No	No	Yes	No	No	No	No	No	Yes	No	No	No	No	Yes	No	No	No	No	No	No	No	No	No	No	No	No	No	Yes
Motorica LLC	Early Stage	http://motorica.org/	Russian Federation	Moscow	2015	Manufacturing tech & materials Med tech & pharma	Going to market	We produce active and functional upper limb prosthetic devices for all ages	Our Company mission is to develop accessible myo-controlled electromechanical upper-limb prosthesis and develop complex training system of using a prosthesis by means of the virtual reality (VR). On the first stage we have already developed an active mechanical prosthetic fingers for the kids.	Ilya Chekh - founder and CEO at Motorica, graduated from the St. Petersburg National Research University of Information Technologies, Mechanics and Optics. BA and MA (with honors) in "Mechatronics and Robotics." Key team members - two engineers with extensive experience in the machinery production.	Our active fingers prosthetic is not a medical device, which hides the flaws as well as interesting and useful gadgets, toys, which allows the child to forget about their shortcomings. Our myo-prosthetic device has the same functionality as Europe models, but will be much cheaper.	The global market of limb prostheses is about $16 bln. World’s demand for upper limb prostheses is estimated to be 2 mln. pcs. This is around $3 bln. in price equivalent. Russian market is around 60.000 pieces and $50 mln. b	Current most advanced prosthetic devices produce next Companies: Otto Bock - Dynamic Arm, Mikelangelo RSL Steeper - BeBionic Touch Bionics - iLimb Vincent Systems - Vincent Evo There are no such prosthetic Company in Russia.	We started our project almost two years ago. During last year we have tested our finger prosthetic device, developed new impact design for the kids, received urssian goverment certificate and launch sales. Also we start to develope first prototypes of the myo-electric prosthetic wrist.	During next 18 month we are planning to spread our first product to all regions in Russia and launch sales in other countries. Also we are planning to finish first basic model of the bionic upper limb prosthetic, receive russian certificate and launch test-sales.	Yes	Yes	Yes	No	No	No	No	No	No	Yes	Yes	Yes	No	No	No	No	No	No	No	No	No	No	No	No	No	No	No	No	No	No	No	Yes	Yes	No
Authenteq	Early Stage	http://authenteq.com	Germany	Berlin	2015	Financial & payment services E-commerce & online marketplaces	Going to market	An online biometric passport that validates users across multiple websites.	Authenteq is an automatic identity verification & reputation management platform that verifies people's real identity & issues a certificate of authenticity that can be used across multiple P2P marketplaces, eliminating anonymity while allowing for privacy, leading to more responsible behaviour.	Kari Thor Runarsson - CEO and Co-founder Runar Karlsson - CSO and Co-founder As well as an Android programmer, frontend programmer and biz ops expert.	Authenteq’s technology verifies the user’s identity by using a combination of Entity/Identity Binding methods, device fingerprinting, social footprint, biometrics and official identification documents to automatically authenticate a user for a much lower price and shorter time than currently availab	Over 1 billion P2P users that are on over 10.000 P2P marketplaces. Additionally we can move into the financial industry as well as several other potential markets.	Jumio, IDchecker, MiiCard	We are pre-launch.	Estimated 83 B2B clients with over 10,000,000 ID Authenteq members.	Yes	Yes	No	No	No	Yes	No	No	Yes	No	No	No	Yes	No	No	No	No	No	No	No	No	No	Yes	No	No	No	Yes	No	No	No	No	No	No	No
ComfortWay. Global Internet at local prices	Normal	http://www.4tourist.com	Czech Republic	Prague	2012	Mobile Industrial internet & IoT	Going to market	Mobile Internet and calls without roaming charges in 100+ countries (€10 per GB)	Developer of a Global SIM card that solves the problem of high cost of mobile roaming and provides affordable data and voice roaming in 100+ countries at local prices (€10 per GB). Customers can select a tariff plan of any local mobile operator with one click via easy-to-use mobile app.	Oleg Pravdin: IT Entrepreneur and investor with 15-years experience, launched VoIP and video-conference projects. Yaroslav Svintsov: 10+ years in Telecom industry, launched mobile commerce projects for MNOs. Development team: 8 engineers who developed software for major vendors.	Users of our Global SIM card can select a local tariff plan and pay for it via an easy-to-use mobile application. They reduce their expenses on mobile roaming up to 95%. This solution is based on innovative Remote SIM Provisioning technology coupled with own Cloud Billing platform.	According to investigations of "Deloitte" and "StarHome Mach", more than 100 M travelers purchase local SIM cards on arrival, and more than 600M travelers switch the Mobile Internet off because of high cost of roaming data (from €100 to $1000 per GB). They are our potential customers.	Major competitors are travel SIM card providers such as "TravelSIM", "WorldSIM", "Keepgo". Our product has 10 times lower price (€10 per GB vs €100+ per GB) and better quality, because we allow selecting the best local mobile operator.	We sold 2500+ travel routers which provide affordable rates on Mobile Internet in the EU. ARPU is about €50 per year. Also we received 50K pre-orders for our Global SIM card from manufacturers and SIM resellers during Mobile World Congress in Barcelona last March.	We're planning to sell at least 100K global SIM cards via our partners: 1. Manufacturers of mobile devices 2. Resellers of SIM card 3. Internet shops 4. Electronic shops in airports 5. Travel agencies for private and business clients. Annual revenue: 4+ M $ on sales, mobile traffic and VAS.	Yes	Yes	No	No	No	No	No	No	No	No	No	Yes	Yes	No	Yes	No	No	No	No	No	No	No	No	No	No	No	No	No	No	No	Yes	No	No	Yes
RealSpeaker Group	Early Stage	http://www.realspeaker.net/en	Russian Federation	Kazan	2014	Industrial internet & IoT Enterprise software	Going to market	Audio - visual enhancement to speech recognition systems	RealSpeaker Group develops the audio-visual speech recognition application RealSpeaker. Our solution uses additional video information, which allows us improving voice recognition accuracy by at least 20-30 per cent. This makes our patent pending technology way ahead of existing competitions.	Viktor Osetrov, CEO, founder, 27 years old. Senior engineer with 7 years’ experience designing, programming and testing software across a variety of platform. Musina Aliia, CFO, co-founder, 24 years old. AR specialist, account and financial manager with 5 years’ experience at the companies as IBM.	We have released beta version of our product for Windows OS, which is currently in use by about 3k paid users from Russia. By the end of the next year, we are going to reach over 35 paid users with a revenue over $1M by the means of English and Spanish speaking people too.	According to TechNavio currently, only 15-20% of the speech recognition market potential is used. The total expenses on speech recognition technologies developing in the world in 2010 were estimated at $1000M and in 2016 the speech recognition market will reach the point of $2500M (+25% per year).	Nuance, Google Speech Recognition, Microsoft Speech Recognition - the biggest speech recognition companies Voice assistants such as Cortana, Siri, Google Now Additional solutions M*Modal, Oculus Rift and others	We won Startup Sauna acceleration program in Finland. After this time we are starting actively working with big corporations. Some of them Toyota, Itouchu, Samsung, LG. And in Startup Chile we are prepared and launched version of our application for Spanish speaking people.	By the means of Slush we are going to start cooperation with big companies from the Europe. And the next goal for us - attract round "A" of investments that can help us to transfer our solution from perspectives technology to commercially successful product.	Yes	Yes	No	No	No	No	Yes	No	Yes	No	No	No	Yes	No	No	No	No	No	No	No	No	No	No	No	No	Yes	No	No	No	No	Yes	No	No	No
iamtogether	Early Stage	http://iamtogether.com	Spain	Barcelona	2013	Social entrepreneurship & Impact Social media	Going to market	We deliver power to citizens to be as big as the great to deal as equals.	The lobby of the citizens: We deliver power to citizens to be as big as the great to deal as equals.	Background is Industrial Engineering as academics, and several positions in managemnt of teams.	We tender people.	mass market	Could be centrals of purchase and companies like groupon	we are more than 50k registered users	1 million people	Yes	Yes	Yes	No	No	No	No	No	No	No	No	Yes	No	No	No	No	No	No	No	No	No	No	No	No	No	No	No	No	No	No	No	No	No	No
Test Lab	Normal	http://test-lab55.ru	Finland	Helsinki	2015	Biotechnology Health & wellbeing	Going to market	Early stage cancer screening by saliva	The aim of the project is diagnostic methodology to identify the presence cancer by saliva. The basis of the techniques of biochemical analysis of metabolites in the saliva of the tumor process with simultaneous statistical estimate of more than 30 parameters	Belskaya Lyudmila project cofounder Ph.D., R&D Director, Gilbert Massard Ph.D, MD, Academician of RAMS Titov Andrey Ph.D., Technical Director project cofounder Denis Kosiakov Chief of international relations Kovalenko Dmitry Commertial director Kosenok Victor Ph.D, MD, Academician of RAMTS	One of the main factors that guarantee the success of diagnostic techniques, will be its universality. In one test of saliva can be tested directly for the presence of several cancers.It will increase the frequency of detection of the early stages, and as a result, allow for the effective treatment	Its open for everybody who wants to prove health. Whole market is $53 billion/year and it had a trend to grow more 7% per year We looking at $1 billion commercialization opportunities.	DNA tests endoscoprion blood tests etc http://israel21c.org/health/new-blood-test-offers-early-cancer-detection/ http://onkotub.ru/?page_id=12 getcolors.com	We almost create a new technology	We have to start sale it :)	Yes	Yes	Yes	No	No	No	No	No	No	No	Yes	Yes	No	No	Yes	No	Yes	No	No	No	No	No	No	No	No	No	No	No	No	Yes	No	No	No	No
Study Advisory	Early Stage	https://www.studyadvisory.org	Finland	Tampere	2015	Social media Education	Going to market	A unique online service for universities to recruit students globally.	Study Advisory makes the perfect matches between universities and students. The service has information of over 11000 universities, and students are able to share opinions about their university. For universities Study Advisory is a cost-efficient, powerful and global marketing tool.	Tuomas Kauppinen&Harri Suominen: Founders of Asia Exchange, Susanne Suominen: Background in financial admin, Antti Järvensivu: Background in IT project mgt, Maria Lahtinen: Background in sales mgt; Veikko Lindberg: Background in IT prod mgt & dev, Janina Haapaniemi: Background in marketing and sales	Study Advisory makes the perfect matches between universities and students. The service has information of over 11000 universities and students are able to share opinions about their university. For universities Study Advisory is a cost-efficient, powerful and global marketing tool.	Currently there are approximately 20 000 universities in the world and each one of these is our potential customer. Also the number of university students is going to reach 262 million by 2025 and student mobility is growing rapidly especially in developing countries.	There are two types providers that we see as competitors: rating providers (Times, QS etc.) and university portals (StudyPortals etc). We differentiate from competitors by having different approach that prioritize students' voice and by including all universities whether they are customers or not.	Our service was launched in September 2015. Before having the service live we have managed to gather numerous leads around the world and worked with founding customers.	After the launch of our service we will start active marketing and selling campaigns towards our potential customers. Our goal is to have 150 customers by the end of 2015 and 1200 customers by the end of 2016	Yes	Yes	Yes	No	Yes	No	Yes	No	No	No	No	No	No	Yes	No	No	No	No	No	No	No	No	No	Yes	No	No	No	No	No	No	No	No	No	No
VEEDEEO	Early Stage	http://www.veedeeo.me	Portugal	Lisbon	2015	Enterprise software Communications & media	Going to market	VEEDEEO: The 21st Century VIDEO HIGHWAYS	Video communications are broken. Unlike in phone, companies simply can’t connect easily with each other using their video conferencing systems. It’s a technological nightmare that doesn’t make sense in the 21st century. VEEDEEO is the cloud platform that enables a new global video connected world!	Carlos Tavares, CTO and Founder. I have been working in IT for over 15 years and have already developed and launched a collaboration product called NEEAAUDIO (www.neeaaudio.com). I have started my first company at the age of 26, that remains active, profitable and successful.	VEEDEEO is a cloud video connectivity service that allows any video conference room to connect externally with other video conference rooms enabling cross-company, cross-geography and cross-network video connectivity. Our main differentiators are: the price model + the ease-of-use (user interface).	The global video-conferencing market is reaching 6.3 billion USD/year in 2020. Cloud video services are growing exponentially and it is expected to reach more than 3.5 billion USD/year in a 5 years timeframe. VEEDEEO is positioned exactly in this market (cloud video platform)	Bluejeans (industry leader), Cisco CMR (new product). Our main competitive advantages are the process (ease of use), universality (no need to install any software or plugins) and the business / pricing model (on-demand connectivity)	0. We are preparing to launch the product in January 2016. From the few approaches we have made to the market - either in large companies, VARs and Telco operators, the feedback has been great, so we expect a rapid growth from the moment the product is launched.	We expect to reach 300.000 USD of revenue in our first year of activity and a MRR of 50.000 EUR/month until the first 18 months of activity.	Yes	No	No	No	No	No	No	No	Yes	No	No	No	Yes	No	No	No	No	No	No	Yes	No	No	No	No	No	Yes	No	No	No	No	No	No	No	No
BioMicroGels	Early Stage	http://biomicrogel.com	Russian Federation	Yekaterinburg	2012	Cleantech Manufacturing tech & materials	Going to market	BMG - is an absolutely new method of water purification from oil and metals ions	BioMicroGel efficiently removes oil and metals ions from the water. It is suitable for waste waters dumped by industrial plants containing ions of metals, separation of oil-water mixtures, mitigation of emergency in case of petroleum products spills either from the surface or from the water column.	The project team was formed by 3 partners who more than 5 years have been working together in different commercial projects. We have brightest minds in the team: 1 doctor of chemical science and 4 candidate of sciences.	BMG - is a new patented water purification reagent technology based on microgels of ecologically-friendly polysaccharides, reagents that are obtained from cellulose, apples and other bio-resources. BioMicroGels can be used as a sweep-coagulants, liquid sorbents (oil encapsulator) and demulsifier.	The European market of water treatment reagents is a continuously growing market, which was estimated to be as large as € 62B in 2004 and by the USA National Research Agency estimate that the European market to reach € 100B by 2017 and €120B by 2020. European total of 26,9% of the world consumption.	Kemira, Feralco, Acorn Water, Chemifloc, Kemiron. BMG aims to disrupt this market by offering BioMicroGel on a competitive price to other conventional coagulants, but offering a unique value to customers due to its eco-friendly nature as well as its effectiveness even in low-concentration solutions.	Rise of revenue on 50%, increase in the number of employees on 40%, Supply of 6 international patent applications: European, Eurasian, US, Canada, India, China and 2 Russian. Get the residency of Skolkovo foundation.	Rise of revenue on 65%, increase in the number of employees on 50%	Yes	No	Yes	Yes	No	No	No	No	No	No	No	No	No	No	No	No	No	No	Yes	No	No	No	No	No	No	No	No	No	No	No	No	Yes	No	No
GameAnalaytics	Normal	http://www.gameanalytics.com	Denmark	Copenhagen	2013	Analytics, big data & AI	Going to market	GA is the largest free big data analytics platform specialising in mobile gaming	GA is the leading big data analytics platform for mobile gaming helping over 5,000 live games monitor, understand and act on how 350m MAU are engaging with their games. Through this unique understanding and scale, GA is developing big data applications to further help developers and studios.	Background of team is in gaming and technology, all successful founders and proven business builders.Morten Wulff - Founder. http://bit.ly/1McuRmOLuke Aviet - CEO. http://bit.ly/1DwnCDkNick Roveta - VP. http://bit.ly/1gM3zqGClaus Moseholhm - CCO. http://bit.ly/1JNFhaV	GA provides a free analytics solution for mobile game developers, our differentiation vs other solutions is:100% freeUnity Gold Partner5.5k live games (only Google Analytics and Flurry could claim to have more in gaming)350m MAU - we think we are the biggest and have unique insight	GA's free analytics is for mid to long tail game developers - growing at same pace as Unity is growing it's customer baseGA's Game Insight (Beta) is for the large publishers / AAA - very new product, but we think it can compliment AppAnnies product	DeltaDNAUnityAnalytics1) GA has more customers, more data and more insight2) GA is free3) GA is integrated in the major game engines (easy to deploy/reduced friction)4) GA's long term model is a data science/optimisation platform (due to our increasing scale) not an analytics service	From 150m MAU to approx 350m MAU From 3.5k games to 5.5k games	Between 50% and 100% growthGoals: Launch 1-2 revenue generating products to proof of concept data driven applications (1st product is Game Insight)Raise a round in January 2016 based on the growth of our core metrics and continued growth from the new products	Yes	No	Yes	No	Yes	No	No	No	Yes	No	No	Yes	No	No	No	Yes	No	No	No	No	No	No	No	No	No	No	No	No	No	No	No	No	No	No
Finnofy	Early Stage	https://www.finnofy.fi	Finland	Tampere	2015	Enterprise software Mobile	Going to market	Finnofy is an innovation platform for mobile applications.	Finnofy is built to ensure everyone’s equal chances to become the innovator of the next breakthrough. The key concept is to use large crowds for innovation process. Finnofy enables regular people to utilize their full potential as innovators.	Tomi Laitila, CEO, Operations and Product Design. Roope Hakulinen, CTO, Software. Lauri Alasaukko-oja, Marketing. Jussi Reijonen, CFO, Finance and Strategy. Ilkka Kaikuvuo, advisor & member of the board, COO of Surveypal Oy Mika Suominen, advisor & member of the board, CEO of Druid Oy	Finnofy produces mobile applications by collecting the ideas of regular people. First the innovating crowd brings the idea and innovation to our platform. If the idea is evaluated as good enough, it will be pursued and brought alive by Finnofy.	Finnofy has basically two kinds of markets. The main market are the normal people who have ideas they aren't able to pursue because for example lack of time, resources and connections. On the other hand we produce new mobile applications for global market and thus also global audience is our market.	Finnofy operates in global scope. The mobile application market is of course heavily competed but we get a huge advantage from the crowd already associated with the idea from the beginning.	Our key metrics come from community involved. Main attributes are the number of people involved with Finnofy and the number of ideas collected. Because we are just launching our platform we are still running low on volume and hope to increase our user base rapidly in near future.	Our main quantitative goal is to launch 5 successful mobile application and create stable community on our platform that constantly evolves the ideas provided. Hopefully one of the applications launched will make a breakthrough and the opportunity to global has realized.	No	Yes	No	No	No	Yes	No	No	Yes	No	No	No	No	No	No	No	No	No	No	No	No	No	No	No	No	Yes	No	No	No	No	No	No	No	Yes
InvestorEye Oy	Early Stage	http://www.investoreye.com	Finland	Hausjärvi	2015	Communications & media Financial & payment services	Going to market	Innovative and modern way for a company to do IR communication.	InvestorEye is a unique and modern solution to a well-known problem companies have in reaching private investors with their investor relations communication. InvestorEye allows companies to conduct their IR efficiently and directly to private investors engaging them to the company.	Co-Founders: Laura Kuittinen (CEO), the marketing genius; Naseer Ahmad (CTO) , the techical mastermind; Antti Kuittinen (chairman), the financial expert Rest of the team: Marc Dillon (advisor), co-founder/COO of Jolla	Our product is about connecting companies with investors and creating interactive vibrant communication platform between them. Our product is valuable to our customers and users since current solutions does not address challenges investor communication is currently facing.	The problem is world-wide and currently there is no fully functional solution. We estimate the current value of the market to be approximately USD 6 bn and growing.	IR Communications market is very fragmented. IR Experts (such as Investis) target individual companies and build tailor-made solutions. Social media (Twitter, FB, LinkedIn) is being used but also acknowledged that they work poorly.	08/2014 company was established and development was ignited. A vision was set and work started. 01/2015 beta release. Since, we have learned a lot and been able to clarify the vision and business model. 08/2015 first release with Nasdaq.	Launch the service first in Nordics and then move rapidly to Europe. Goal is to be first in the market and eventually remain as number one.	Yes	No	No	No	Yes	Yes	No	No	Yes	No	No	No	No	No	No	No	No	No	No	Yes	No	No	No	No	No	No	Yes	No	No	No	No	No	No	No
CrowdImpact GmbH	Early Stage	http://www.crowd-impact.com/	Germany	Munich	2013	Social entrepreneurship & Impact Communications & media	Going to market	Transformational micro-stories to inspire action.	Using storytelling, we break down goals, processes and brand values into micro-actions. Delivered via software, people can implement development into their everyday lives. Framed by a specific process, we can facilitate change and empower companies to engage their stakeholders on a day-to-day basis.	Nils-Claudio Sierck (Co-Founder, CEO), serial entrepreneur, builds his businesses based on being at service, meaning matters, trust and gratitude. Antti Kirjalainen (Co-Founder, Creative Director) serial entrepreneur, architect, designer, curator World Design Capital Helsinki 2012.	Change management consulting process supported by micro-action software as a service. CI-Flight Suite connects the client-operation to their blood memory and translates corporate strategy into firsthand experiences on an individual level.	Tier-2 companies and their communities who have ascended beyond the goal of selling a product to selling meaning and quality of life. The meaning economy is a growing market and we see our opportunity in creating professional content.	grovo.com is a competitor. But instead of focussing on simple tutorials for business-tools via embedded videos we offer a more holistic approach for the user and try to create an impact in his everyday life, unlocking his potentials and help him to become his true self. We focus more on bottom up.	We grew from a core team of 4 members to 10, tripled our investors money and gained 5 new business partners/customers. Our product evolved from a mere idea to a defined process and an application in beta phase.	We'll gain a community of around 750.000 users, generating 1 million $ revenue. Our team will grow to 20 members including specialists from every interactive field. Strategy: Heavy networking in tier-two companies with established communities.	Yes	Yes	No	No	Yes	No	No	No	No	Yes	No	Yes	No	No	No	No	No	No	No	Yes	No	No	No	No	No	No	No	No	No	No	No	No	No	No
BuyFactors Inc.	Early Stage	http://www.buyfactors.com	United States	San Francisco	2015	Enterprise software Analytics, big data & AI	Going to market	BuyFactors™ is a Prescriptive Decision Analytics platform for B2B sales.	BuyFactors™ takes the guesswork out of selling by helping sales reps analyze their sales interactions and buyer´s decisions. It detects the weak spots within the deal and sales reps can use this insight in optimizing their next sales interaction, in order to effectively influence buyer´s decisions.	Pekka Sipola (Founder, CEO) has +15 years experience in sales and marketing, building web/mobile products and growing a successful business. Dave Douglas (Founder, VP Customer success) has +25 years experience in sales and marketing, 2 x IPO and 4 x Exit under his belt in Silicon Valley.	BuyFactors™ is a cloud platform using reinforced machine learning and prescriptive analytics to detect weak spots within the deal and it provides actionable recommendations for salespeople to optimize their next sales interactions with the buyer´s to effectively influence purchase decisions.	Sales Acceleration market is estimated to grow to $15.8B by 2019. There´s 5.6M non-retail sales reps in US, average spend in Sales Acceleration Technology is $2820 / sales rep / year.	There is a lot of sales solutions on the market to increase sales effectiveness, but these solutions are failing to resolve the main problem what front-line sales is facing today, poorly performed sales interactions. There is no other solution on the market focusing on optimizing sales interactions.	We are in pre-revenue stage. Launching the Beta in October 2015.	We are using a B2C2B strategy and our goal is to build out a B2C user base of 15 000+ people in the next 18 months and we are focusing on Enterprise companies. The follow up strategy is to convert 10 000+ B2B users into paying customers by selling the product for their employing companies.	Yes	No	No	No	Yes	No	No	No	Yes	No	No	No	No	No	No	Yes	No	No	No	No	No	No	No	No	No	Yes	No	No	No	No	No	No	No	No
Plumbr	Normal	https://plumbr.eu	Estonia	Tallinn, Tartu, Boston	2015	Enterprise software Analytics, big data & AI	Going to market	Application performance monitoring with automatic root cause detection.	Computers are ready to take care of performance troubleshooting. Plumbr notices when your application is slow or down and automatically reports what you need to fix in source code to make the problem go away. Very unique and distinguishing IP, multi-billion-dollar market, proven with customers.	Founders were key team members of nortal.com - the biggest IT consultancy company in the Baltics. Priit (CEO) built a team of 70 from 0. Ivo (Product) was CTO of Nortal Group. Vladimir and Nikita were core developers and running the R&D team.	Plumbr monitors IT application performance. When an incident (slowness, crash) happens, it detects what line of code is causing it. The concept grew out of PhD research and was considered impossible before :) Allows for millions of savings in reduced manual work and avoided impact on image	Application Performance Monitoring - Gartner reports to be around $3bn/year and growing at 15% year-on-year. Market growth is accelerating, because more and more businesses depend on IT and they feel the need to ensure that their IT systems are up and at top performance.	There are tens (hundreds?) of Application Performance Monitoring products. Most important ones: Dynatrace, New Relic, AppDynamics, CA. Also IBM, HP, Dell, etc have APM units. None of the incumbents have ability to automatically detect root cause. Some early stage startups (Takipi, jClarity).	2015Q2 vs 2014Q2: * JVM-hours (the amount of time Plumbr users monitor their applications) +43% * ARR +128% Throughout 2015, we have grown MRR by more or less 10% every month	Reach $50k monthly bookings by end of 2015. $100k MRR by end of 2016.	Yes	No	No	No	Yes	No	No	No	Yes	No	No	No	Yes	No	No	Yes	No	No	No	No	No	No	No	No	No	Yes	No	No	No	No	No	No	No	No
Artquant Ltd.	Early Stage	http://www.artquant.com	Russian Federation	Moscow	2014	Analytics, big data & AI Financial & payment services	Going to market	ArtQuant Ltd. provides innovative FinTech and InvestTech solutions	The company provides FinTech and InvestTech software solutions for the stock market.Our goal is to create innovative products that can successfully overcome global challenges which are caused by the extraordinary increase of the amount of various data in the financial sphere.	Samit Yakovlev - Co-founder and Managing Partner. Samit has the recognized by the world community stock market experience (including asset management with the use of algorithmic trading systems. Ilya Filippov - CEO and Co-founder. Ilya has a huge experience in creating of the quantitative models.	Portfolioand.Me is a fundamental analysis tool for the US stock market that is based on artificial intelligence. The tool allows users to build and adjust stock portfolios in accordance with specified criteria and to monitor the dynamics of company shares and exchange-traded funds (ETFs).	Our clients are all financial market participants, including major financial institutions, banks, hedge funds, investment funds, portfolio managers, financial advisors and private investors.	Our competitors include companies like Kensho, Lucena Research and Bloomberg. Our main advantages are: a complete stock portfolio ready for purchase, ranking of indicators that have worked well in the recent past and smart estimates. Testing strategies through Portfolioand.me takes mere seconds.	We launched our flagship product Portfolioand.Me in June 2015. During this time, we managed to conduct beta-testing. Our 60 beta testers included financial analysts, hedge fund managers and portfolio managers from major Russian companies.We improved the product, using the valuable feedback obtained.	Our goal is to reach 1 million in revenue for this period. We intend to run a full-scale marketing campaign, to continue direct sales, take part in conferences and to engage in other marketing activities. We also seek to launch an updated version of Portfolioand.me in September 2015	Yes	Yes	No	No	Yes	Yes	No	No	No	No	No	No	No	No	No	Yes	No	No	No	No	No	No	No	No	No	No	Yes	No	No	No	No	No	No	No
Jumbon Ltd.	Early Stage	http://www.freakcircus.net	Finland	Oulu	2015	Mobile Gaming	Going to market	Passionate game studio creating high quality mobile games.	We're a growing game studio from Oulu, Finland. Our core focus is creating fun-to-play mobile games combining crazy ideas and brilliant visuals. Our first game, Freak Circus Racing, released for iOS and Android in June 2015. Currently we're working on expanding the Freak Circus universe.	Samu Keränen, CEO, Founder - Serial entrepreneur since 2007, industry speciality B2C, Music, Gaming, Entertainment Olli Mäntylä, COO - Background at LudoCraft Ltd., in Mobile, PC and Educational game projects Jyri Autio, CTO - Long history in game development, Finncodex, Kinos Game Studio	Freak Circus Racing is wacky and crazy mobile racing game with unique visual style and sense of humor.	Mobile games are growing faster than any other segment on global games market. This year will mark the first time mobile games surpasses all other segments, including console games.	All racing games on market. Racing game players change their games easier and more often than players on other categories like Puzzle and Strategy games. Our Day 1, Day 3 and Day 7 Retention numbers show exceptionally good player dedication.	Last 12 months we've focused on game development, early market entry and analytics. And followed that with additional polish and optimization for the game and marketing push based on player feedback and metrics.	Launching Freak Circus Racing on Asian markets, additional polish, optimization and content for the game. Optimizing marketing push and visibility. Expanding Freak Circus universe with new titles.	No	Yes	No	No	Yes	No	No	Yes	No	Yes	No	No	No	No	No	No	No	No	No	No	No	No	No	No	No	No	No	No	Yes	No	No	No	No	Yes
processCLOUD	Early Stage	https://www.processcloud.xyz	Finland	Helsinki	2015	Industrial internet & IoT Manufacturing tech & materials	Going to market	processCLOUD is what you do in the cloud	processCLOUD is a tool to support management and decision making through process measurement. Every single repetitive event is registered on our cloud servers allowing to our customers follow up what they are doing using charts, sorting results by day, month or specific period, from anywhere.	The founder is Eduardo Luis Hofmann, who has a large background on manufacturing process. The concept of processCLOUD came from a self-professional requirement of a simple tool to measure process productivity. More info on linkedin: https://fi.linkedin.com/pub/eduardo-hofmann/0/257/659	processCLOUD is a sensor connected to our servers on which every single event is stored on the cloud It allows user to get reliable data about any process, how many pieces produced, downtimes and others The key differentiation is that you can access it from tablet, smartphone or desktop, anywhere	Manufacturing industry, small shops that want to know how many customers enter the store, offices, anyone that want to record repetitive events	There are some players in this market, with focus on special equipments and the cost is >500€ per station. Our target is to provide a simple solution less than 100€ and also API to allow users to implement their own way to detect events and store in our servers with a subscription fee.	The kick off of this project was in August, 2014. Since then, I spent 500 hours working on the development and testing, this was during my free time as I still have my regular work.	Approach partners from my network and supply them one device for testing. Another approach will be offering to teachers from MBA and Engineering schools to test processCLOUD allowing them to know it and use on their discipline. The objective is to help students and later keep them as customers.	Yes	Yes	No	No	Yes	No	No	No	No	No	No	Yes	No	No	Yes	No	No	No	No	No	No	No	No	No	No	No	No	No	No	No	Yes	Yes	No	No
Stormcharge	Early Stage	http://www.stormcharge.com	United Kingdom	London	2015	Transport & automotive Gaming	Going to market	Simulation development to real world autonomous vehicle command and control	Developer of realistic broad audience 3D battle simulations with real map data, with serious training and real world applications of distributed remote control and monitoring of autonomous vehicles. Target audience games: core gamers enjoying realism, serious applications: government organisations.	Markus Kantonen	The differentiating features for serious markets have been innovative user experience that allows seamless view switching between 2D real world map data, 3D and sensor views and that there are both 2D and 3D views. For core gamer the differentiating features are UX, scale and realistic behaviour.	10M+ core gamers that enjoy using Steam, App store and Google Play Organisations that need to train, operate, monitor and control autonomous vehicles (land-based or airborne) from single command centre or multiple locations and devices.	Wargaming (World of Tanks), Focus Interactive (War Game), Bohemia Interactive (Virtual Battlefield), etc. Competitive advantage is in innovative UX that works both with mouse / keyboard and with touch devices, realistic behaviour, works on devices with different screen sizes down to mobile.	Last 12 months have been R&D to achieve the minimum level of engine features for a battlefield simulation for IOS tablets.	6 months: Find publisher that is ready to fund the polishing of the first game. Self publish if we cannot find a publisher with acceptable terms. Close first serious application government deal. 12 months: First game out for IOS, Android and Windows/Apple/OSX. Expand serious application market.	Yes	Yes	No	No	No	No	No	No	No	Yes	No	Yes	Yes	No	No	No	No	No	No	No	No	No	No	No	No	No	No	No	Yes	No	No	No	No	No
Deli Piste	Early Stage	https://delipiste.fi/	Finland	Helsinki	2015	Food & nutrition Transport & automotive	Going to market	Deli Piste brings lunch from your favorite restaurants to your door.	Deli Piste is an online food ordering for business meetings and events. We help to save time, cost, and efforts by connecting restaurants and catering services with companies and ease the process of placing orders for events with easiness, convenient and transparency.	Minh Nguyen, CEO & Co-founder, BBA in Business Information Technology Olli Keränen, Marketing Director, BBA in International Business Chau Do, Co-founder, BBA in International Business	Deli Piste aims to gather all catering services and restaurants onto only one place with suitable menus and prices for business meetings and events. Companies can easily compare menus and place the order for 100 people at the same time only by going to https://delipiste.fi.	The aimed market is worldwide, especially first in the Nordic areas and then rest of Europe. Targeted markets segments are companies and catering services. The market has a lots of opportunities as there is currently no good enough service provider and the segments have the need for the service.	Currently, there is no direct competitors. The most competitive advantage is we have all many catering menus for business events with the transparency of cost.	Since the establishment of company on 15 Feb 2015, our current revenue is 7000 EUR and it is increasing fast. We have made partnership with more than 10 high-quality restaurants and catering services and expand our service to 3 big cities of Finland which are Helsinki, Espoo, and Vantaa.	To improve the metrics, we would like to focus more on sales and marketing in order to reach more customers and retain the existing ones. Besides, we would perform market research and improve our ordering methods - website, app, phone, sms and communication methods with restaurants and companies.	Yes	Yes	No	No	No	No	No	No	No	No	No	No	Yes	Yes	Yes	No	No	No	No	No	No	No	No	No	No	No	No	Yes	No	No	No	No	No	No
insta Holding AG	Normal	http://www.instalog.in	Switzerland	Lucerne	2015	Cyber security Mobile	Going to market	Revolutionary & highly secure log-in technology that will kill the password!	The insta Holding AG provides log-in technology for web and intranet applications. We focus on providing the highest available security for log-in and other authentication processes with applications that are designed to provide additional value to you and your customers.	Marcel Amann, CEO, Founder / Julius Knoche, COO / Michael Piecko, CTO / Pasquale Pultrone, CSO / Jochen Kassberger, Chief Strategist	instalog is our universal cross-platform log-in tool. We developed a technology that does not simply substitute or emulate login via username and password…it makes it obsolete! We enable your users to authenticate via mobile device.	We believe that static two factor authentication is one of the oldest unchanged technologies still used unchanged since the beginning of the world wide web. So basically we would like to state infinity...however based on our value proposition it is business profiting from increased customer lifetime	Some...most however not as secure and not focused on actively fueling revenue in order to pay for its own application. In addition there are patents which limit competition using similar UX and encryption.	...hey, relax a little bit...we are just beginning to push into the market...but our sales pipeline has grown massively in quantity & quality over the past three month.	Talk to us!	Yes	No	Yes	No	No	Yes	No	No	No	No	No	Yes	Yes	No	No	No	No	No	No	No	No	Yes	No	No	No	No	No	No	No	No	No	No	No	Yes
Yepzon	Normal	http://www.yepzon.com	Finland	Tampere	2015	Wearable technology Consumer electronics	Going to market	In the future nothing is lost anymore. In that future Yepzon is a concept.	Yepzon designs and sells locators and locating services. The locator is used to track e.g. elderly, children and valuables. Our locator is already sold in 7 countries and worldwide sales are being ramped up. Yepzon competitive edge comes from easiness of use, high quality and cost efficiency.	Otto Linna,	Yepzon is the simplest positioning device in the world. In addition to its simplicity it is also foolproof in data security. No usernames, accounts, emails asked. Yepzon's unique operating logic gives it extremely long battery life, even months. Perfect for kids, pets and valuables!	3,5BN market at 2019 (ABI Research) in industry. Great tool for families to ease their lives. Only Alzheimer patients tens of millions globally. Million children reported lost every year in only US and EU territories. Market is global and need increasing.	Industry is at its early stage and only a little of competition. All the actors in this field grow the market so Yepzon does not see competition tough yet. Yepzon stands out with its simplicity, battery life, design and data security. Yepzon's reliability is already recognized among the customers.	From sales of zero to 0,25M. Return rate of the devices is less than 1%. Customer satisfaction is at very high level.	Yepzon has just got US certificates and will launch there big in Christmas season. Own e-commerce platform is just opened and at the same time company has signed significant distribution agreements with important players in the field. Following 18 months will gain 5M of revenue.	Yes	Yes	No	No	Yes	No	No	No	No	No	No	Yes	Yes	No	No	No	No	No	No	No	Yes	No	No	No	No	No	No	No	No	No	No	No	No	No
Etsimo Ltd	Early Stage	http://www.etsimo.com	Finland	Helsinki	2015	Mobile Analytics, big data & AI	Going to market	We improve findability, utilization and monetization of products and information	We provide superior, fast to implement, cost-effective and easy to use cloud-based visual discovery services that makes all our customers information/products findable without messing with their existing monetization models.	Thomas Grandell, CEO, serial entrepreneur and visionary / Ville Virtanen, CTO, cloud systems development / Giulio Jacuzzi, CSO, Professor, human-computer interaction / Tuukka Ruotsalo, CDO, post doc, interactive information retrieval, AI & machine learning / Samuel Kaski, Professor, machine learning	The Etsimo Explorifier is a visual discovery platform built for information discovery services and ecosystems. It works with just keywords on any type of data and can be applied on e.g. news, publications, products and business intelligence. It produces 109% better hits than text based systems.	All organizations dependent on consumer's easy discovery of information and products.	We indirectly compete with conventional search engines. Our competitive edge is the unique combination of exploratory search engine and visual interface built specifically for information discovery. Tests show 109% better results, 4x more interactions and 2x more page views. Two pending patents.	We're in pre-launch stage with several pilot projects.	We are launching our SaaS Q1/2016 and based on the publicity and over 1.000 contact requests we have received despite being in stealth mode, we expect significant growth.	Yes	Yes	No	No	Yes	No	No	No	Yes	No	No	No	Yes	No	No	Yes	No	No	No	No	No	No	No	No	No	No	No	No	No	No	No	No	No	Yes
Me2we Finland Oy	Early Stage	http://me2we.fi	Finland	Helsinki	2013	Education E-commerce & online marketplaces	Going to market	Me2we is a versatile collaboration platform between universities and companies.	Me2we is a tool for companies to expand into international markets with the help of talents and universities. Me2we platform fosters company-university cooperation by providing real business cases to university courses.	Petri Tuomela (CEO, founder), Jami Haavisto (CTO, founder), Doris Hollo, Chuqiao Yu, Julia Khvostova, Felipe Cañete, Svetlana Popova, Valtter Laaksonen, Aapo Väätäinen, Tuyen Nguyen	Me2we is an innovation and internationalization platform. Companies can collaborate with universities around the world. They can either send projects to universities or crowdsource their projects for talents. Platform remarks itself through the simplicity of use.	SME's, universities and highly educated talents. Most important group is companies with their own product/service.	Freelancers, Consulting companies, Project platforms, HR companies	- External funding - Strategic partnership with Eilakaisla Oy an Vincit from June 2015- 10 successful projects done- We are in contact with 30 new universities and negotiating their registration- Platform and service development- Team development - employees from 6 different countries	Our team focuses on expanding the network to Scandinavia, Baltics and central Europe. We keep the door open for other countries as well. We expect 150 universities to join our platform in the next 18 months.	Yes	No	No	No	No	No	Yes	No	No	No	No	Yes	No	Yes	No	No	No	No	No	No	No	No	Yes	Yes	No	No	No	No	No	No	No	No	No	No
Dramatify	Early Stage	http://www.dramatify.com	Sweden	Stockholm	2013	Enterprise software Music & entertainment	Going to market	Dramatify is mobile SaaS production management for TV, Film & scripted VR.	Dramatify replaces today's antiquated production management methods in TV, film, video & scripted virtual reality, with a modern, industry specific mobile platform that gives producers better management tools resulting in increased efficiency, reduced risks and decreased standstill costs.	Annika Lidne, CEO & biz / design lead - serial entrepreneur with a background in TV, film, internet, communication / marketing. Angelika Olsson, CTO & lead developer - seasoned lead dev and business system architect. Daniel Chilla, production pro & advisor Jan Svensson, business controller	With the support from producers around the world, Dramatify have developed the most sought after features for creating and managing a TV or film production from script to planning and shooting with team collaboration and information on mobile during the shoot, saving both time & money.	Our addressable market is 300 MUSD - 1 BUSD, the higher figure in relation to a fully networked solution that dominates the market and that not only monetises the production companies, but also the network and individual team members through valuable add-on ?services. TV is the primary focus.	Currently, there are 3-4 small companies active in our space, of which none have wide adaption. They either lack a mobile solution and/or have an antiquated user experience. Most producers we meet say that our solution is the best they’ve seen, even before all core functionality was in place.	We have been focused on finishing the commercial product, not growth or user acquisition. Still, before commercial launch this fall, we have 900 professional users from over 30 countries.	Our goals are to 1) Sign up the major Nordic production companies on company-wide deals that kicks up rollout in their international parent companies 2) To work with early adopters among international producers 3) Establish our first sales reps in key territories	Yes	No	No	No	No	No	No	Yes	Yes	No	No	No	No	No	Yes	No	No	No	No	No	No	No	No	No	No	Yes	No	No	No	No	No	No	No	No
Admetsys	Early Stage	http://www.admetsys.com	United States	Boston	2013	Med tech & pharma Biotechnology	Going to market	Novel artificial pancreasl that improves health outcomes and health economics.	The Admetsys Smart Pancreas™ measures and maintains a hospitalized diabetics blood sugar levels in real time so their blood sugar mirrors that of a healthy patient.	The management team is led by Jeff Valk, Chief Executive Officer, a seasoned leader of highly technical organizations, and a hardware and software engineer specializing in design of adaptive systems. Research and clinical operations are headed by Dr. Tim Valk, Chief Scientist, a board certified endo	Admetsys has developed the first artificial pancreas system specifically for the needs of hospital and surgical care. The system attaches to a patient’s intravenous line, and automatically measures blood glucose concentration in real time and with no blood loss. From this, it creates an adaptive, co	21 Drydock Ave Fl 6 FL 6	Admetsys’ system is the first fully- automated glucose control device designed for hospital care; no competitive closed-loop systems presently exist. Moreover, it is the only technology that provides an active safeguard against hypoglycemia in hospital patients.	Admetsys has conducted three FDA approved clinical trials using fully-engineered prototype devices, demonstrating 97% target glucose control (80–125 mg/dL) and 100% prevention of hypoglycemia (<70 mg/dL). Pivotal trials to support market clearance will begin in late 2015, and market launch is expect	Admetsys is raising a $500k convertible debt round to accelerate its production engineering and support its European clinical trials planned for launch in November at Kolding Hospital. A subsequent series A raise of $7 million will be required to achieve market clearance both in the Europe and the U	Yes	No	Yes	No	No	No	No	No	No	No	Yes	No	No	No	No	No	Yes	No	No	No	No	No	No	No	No	No	No	No	No	No	No	No	Yes	No
PromoRepublic.com	Early Stage	http://promorepublic.com	Finland	Helsinki	2015	Social media Communications & media	Going to market	PromoRepublic instantly turns SMEs and Startups into social marketing gurus	PromoRepublic is supporting sustainable development of local SMEs, being a mix of online course for first-time marketers and social media marketing automation tool. We give SMEs and Startups additional sales and marketing channel for a very-very low cost. They build brand and sell more on Facebook.	VAL (CEO) Entrepreneur, 8 years in digital marketing. Founded digital agency for SMEs, built web services for SMEs MAX (BIZ DEV) 10 years in digital marketing and sales. Co-founded digital agency which became leading in 3 years MIKE (CTO) 7 years experience of web development on senior positions	PromoRepublic users get only 20% of knowledge and do 20% of actions that bring 80% of results on social networks. They spend just 30 minutes to fill content calendar for a months and get back to their business, while PromoRepublic is posting for them automatically at a right time and frequency.	PromoRepublic is operating in a growing segment (marketing automation) of proven market. Segment enjoyed a 60% growth from $750 mln in 2013 to $1.2 bln in 2014. Automated platforms will soon gain the lion’s share of the market, while agencies are likely to get burnt. Regular acquisitions take place	Our competitors are either providing sophisticated tools that fit needs of full-time marketers. Tools that have a lot of functions but are hard to use (HootSuite, HubSpot). There are also easy-to-use tools like Buffer or Canva, that are usable but cover only part of social media marketing.	Relaunch after Pivot starting February 2015. Growth last 6 months - from 0 to 3 000 registered users, 0 to 5 000 connected social media profiles, 0 to 10 000 posts made monthly, from 0 to 350+ paying customers growing 25% weekly. Viral effects.	We will keep growing where we are strong (Russian Speaking Internet) until we have reached position of market standard. We know our channels already. We made localisations and entered English speaking market (UK, US) and Brazil realising "Preparation for global growth" project (powered by Tekes).	Yes	No	No	No	Yes	No	Yes	No	No	No	No	Yes	No	No	No	No	No	No	No	Yes	No	No	No	No	No	No	No	No	No	No	No	No	No	No
StartUp Roadway	Early Stage	http://startuproadway.com/	Latvia	Liepaja	2015	Education Social entrepreneurship & Impact	Going to market	A new way To develop your business around the world	Start Up Roadway is arranging the worldwide part time business placements and mentorship, as it's never been done before.Bring your business to a new country every week, meet with fantastic business people, explore the business world inside for your project in a different locations.	Davis Paipa, entrepreneur, has bachelor in entrepreneurship and innovation. Rodijs Razmus, IT developer, Bachelor in E- Concept.Friends from child hood, didn't succeed with last business idea, but learned a lot and now we are stronger and smarter as team.	We are providing easy way to start business in different locations around the world. With help of our mentors in specific locations, teams will have faster start to launch their product into new market. We are partnering with business centres around the world to have a best locations.	We are looking into providing this service to startups and graduates from accelerators.	We dont have any direct competitor, but there is indirect as share a desk	We are working only for one week, and we have 17 international partners	We are focusing on startups and accelerators, hoping to have more than 100 international partners.	Yes	Yes	No	No	No	No	Yes	No	No	No	No	Yes	No	No	Yes	No	No	No	No	No	No	No	No	Yes	No	No	No	No	No	No	No	No	No	No
Futureplay Ltd	Early Stage	http://www.futureplaygames.com/	Finland	Helsinki	2015	Gaming	Going to market	Futureplay Games is redeveloping the future of mobile games	Founded in 2015. Our focus is on creating a new category of “view-to-play” games – broadly accessible gameplay with a natural integration and rewarding ad-based monetization. We believe in F2P and ads – both done right can be great, you will see.	Five founders with 60+ years of total experience from the gaming industry and from companies such as EA, Rovio, Remedy, Boomlagoon and Reaktor. Kai Auvinen, Jami Laes, Tuomas Huhtanen, Arttu Mäki and Mika Rahko.	We are combining two very high growth trends in the market - mobile ad explosion and idle clickers with a very mass-market theme into a mobile gaming hit in the making. We want to show it to you and let you play it for yourself.	The mobile ads market is estimated to top $100B in 2016 and no developers are focused on this huge growth. Everybody is still looking at the TOP-Grossing chart when the there will be a larger market on the Free Charts.http://bit.ly/1an7Kpw	App Stores are of course full of games, but with a focus on ad driven monetization we can build games in our View-To-Play model that are more fun, viral and less costly for the players. We don't compete with ad networks, we work with them. We don't compete with Supercell they run ads in our games.	TBD, haven't launched the game yet when I am writing this.	Our goal is to launch 6-12 games in the next 18 months to grow into 30 people and $50M-$100M yearly revenue in 2016. We believe in F2P and ads – both done right can be great, you will see. We want to develop fast and have fun launching multiple games per year and not work multiple years per game.	No	Yes	No	No	Yes	No	No	No	No	Yes	No	No	No	No	Yes	No	No	No	No	No	No	No	No	No	No	No	No	No	Yes	No	No	No	No	No
InsightsForce	Early Stage	http://insightsforce.com	Estonia	Tallinn	2015	Analytics, big data & AI	Going to market	InsightsForce - App Reviews Intelligence and Engagement Platform	InsightsForce collects all reviews from app stores, social media, forums and blogs and precess it with sophisticated multilingual semantic engine returns clear actionable insights, gives alerts and provides tools to react for the developer.	The team combines Entrepreneurship Drive, Enterprise level Business experience and deep technology expertise with 10+ engineers onboard. Founders have experience with companies like Google, Nokia, SAP, Motorola.	InsightsForce collects all reviews from app stores, social media, forums and blogs and precess it with sophisticated multilingual semantic engine returns clear actionable insights, gives and alerts and provides tools to react for the developer.	There are over 15 000 developers with over 1 million downloads in Google play only. The number grows fast and we also address markets like China with 9 Android app stores bigger than Google Play. The average? check for analytics and collaboration pack will be about USD 200 per month.	Main competitors for now are Applause.com and several significantly smaller players. The main differentiators: - Broad data collection including Chinese stores and custom sources - Sophisticated linguistic engine with client specific customization even in starting packs - Reasonable pricing	Started in March, test clients since May. Several paying customers including Microsoft, banks, mobile operators. Startup Sauna Spring'15 batch participant.	300+ customers 9 languages supported covering top app stores regions including China, Japan and Russia	Yes	No	No	No	Yes	No	No	No	Yes	No	No	No	No	Yes	No	Yes	No	No	No	No	No	No	No	No	No	No	No	No	No	No	No	No	No	No
Devilabs Oy	Early Stage	http://devilabs.com	Finland	Turku	2013	Enterprise software Education	Going to market	Data center training company with a unique remote connection technology.	We have a solid track-record of data center trainings for which we developed a simple remote connection technology. Besides trainings, Devilabs WARP can be used for any remote access purpose. WARP can be embedded into any website using REST API -- Only browser is needed, no installations, no hassle.	Markus Leinonen (CEO) has a 15-year solid technical track from programming to data center trainings and consultation. Antti Hemminki (CoB) has over 20 years of recognized experience as an IT entrepreneur, trainer, speaker and consultant.	Devilabs WARP is a remote connection technology that only requires a web browser -- no installations or configuration tasks. Using WARP you can establish connection to virtually any network accessible service. Thanks to REST API, WARP can be embedded into any website with simple JavaScript code.	Market opportunity is huge: a) Virtually all companies with "some IT stuff" can benefit of WARP (SMBs to Enterprises), but especially companies with own SW or HW products, data centers and remote offices/workers. "Where there is remote use, WARP is the solution" b) Product is ultra scalable!	Traditional remote connection technologies like Remote Desktop Protocol, SSH, VNC and VPN secure connections.	Practically zero growth because of heavy investment on product R&D.	FY 16/17 are expected to be rapid growth years. Revenue is expected to triple for 2016 and double for 2017. Strategy is clear: finish commercialized product (fall 2015), update websites + all other sales support resources. Invest in inb. marketing & targeted sales. Launch 50 WARP pilot projects.	Yes	No	No	No	Yes	No	Yes	No	Yes	No	No	No	No	No	No	No	No	No	No	No	No	No	No	Yes	No	Yes	No	No	No	No	No	No	No	No
Agrishares	Early Stage	http://www.agrishares.com	Serbia	Novi Sad	2015	E-commerce & online marketplaces Food & nutrition	Going to market	Online marketplace for sharing of agricultural machinery, equipment and services	AGRISHARES matches renters’ needs and owners’ spare resources, optimising efficiency and reducing costs for both sides, thus creating a win-win solution. Additional assistance is provided though scheduling and record keeping tools, renting price calculator and a review system.	Boris Petrenj (CEO), PhD in Industrial Eng. and Management, MSc Computer Eng. Milutin Nikolic (CTO), PhD in Robotics. Ana Milicic, PhD in Applied computing, MSc in Computer Eng. Miloš Obradovic, MSc in Electrical Eng, MSc in Eng. Management. Marko Nedeljkov, Master in Agronomy, 10-year experience	Online marketplace for sharing of agricultural machinery and equipment and hiring services. AGRISHARES matches renters’ needs and owners’ spare resources, optimising efficiency and reducing costs for both sides, creating a win-win solution.	Our analysis estimated that agricultural machinery rent and lease market in EU is around 4.65 billion EUR, and more than 17.5 billion EUR worldwide. This is very rough estimation but good enough to show that the market is large.	Competitors are Tractor rental agencies. Our competitive advantages are: unlimited territorial coverage, wide spectrum of machinery and equipment, customization and flexibility (rent or hire), win-win solution for both sides (empowering owners), scheduling and record keeping tools.	The project officially started on June 1st, 2015 with a duration of 6 months. The web application is currently under development, and the release of an MVP is expected at the beginning of September.	Multiple-channel marketing activities will start in parallel with the website launch. Validation will be carried out through engagement of the Fractals end-users community. At the time of Slush we should be able to provide more information on user traction and growth.	Yes	Yes	No	No	No	No	No	No	Yes	No	No	No	Yes	No	Yes	No	No	No	No	No	No	No	Yes	No	No	No	No	Yes	No	No	No	No	No	No
Liid Oy	Early Stage	http://liid.com	Finland	Helsinki	2015	Mobile Enterprise software	Going to market	Enabling smarter sales insights by automating CRM data entry	Our app automatically logs all client contacts (calls, emails, meetings & notes) into cloud-based CRMs. The data collected in our cloud is used for a virtual assistant that steers the sales process. Benefits: time-saving for salespeople, improved CRM data quality and analytics for sales leadership.	Our core team and full-time employees are Juha Herranen, CEO and Product Owner, Risto Linnoskivi, Lead Developer and Maria Sundström, Head of Sales. Our fourth founder Antti Nikander is chairman of the board and working part-time. We are experienced in developing mobile applications and B2B sales.	Our app automatically logs calls and emails into cloud-based CRMs based on the contact data that can be found in the CRM. Meetings and notes can be added by speech-to-text and new leads created by scanning business cards. We currently support Salesforce & Dynamics on the CRM side and iOS & Android.	The market for CRM-related mobile applications are estimated to grow by 500% by 2017. We are focusing on cloud-based CRMs and over 50 % of CRMs will be SAAS-based at the end of 2015. Salesforce has an annual growth rate of 30 %. Microsoft Dynamics has an annual growth rate of 23 %.	Our main competitors are Tactile & Ondigo. They do not log calls & emails automatically but rely on manual logging. They also only support Salesforce, while we have a cloud based platform that enables us to scale our business into new CRMs in 2-4 weeks.	We have more than 100 users from different European countries and around 50 piloting companies. We also have several paying customers. We are currently in the process of launching a free version for Salesforce and Microsoft Dynamics CRM and expect user acquisition to multiply.	We expect to have >5000 users and >100 clients. We will be present around the globe and cash flow positive.	Yes	No	No	No	Yes	No	No	No	Yes	No	No	No	No	No	Yes	No	No	No	No	No	No	No	No	No	No	Yes	No	No	No	No	No	No	No	Yes
Bxx Software Ltd.	Early Stage	http://www.bxxsoftware.com	Finland	Helsinki	2014	Enterprise software	Going to market	Customer Experience. Brand. Master the Growth.	Bxx Software helps companies to improve their customer experience, grow their brand and business.	Tommi Huuska, CEO, Customer insight, customer behavior Antti Rahtu, CTO, Technology Jari Taipale, Brand development	Ground breaking customer in-sight software for developing, follow-up and grow your brand and business.	Total Bi market is 18 BUSD globally. Relevant market 5-10% of it.	Competitor categories are BI software and dashboards. Our product is sharply focused on Brand and customer experience.	Our product was launched spring 2015 so the growth is high.	Full sales launch in Finland 2015 and opening the markets in Sweden.	Yes	Yes	No	No	Yes	No	No	No	Yes	No	No	Yes	No	No	No	No	No	No	No	No	No	No	No	No	No	Yes	No	No	No	No	No	No	No	No
Foodiac	Early Stage	http://foodiac.fi	Finland	helsinki	2015	Food & nutrition E-commerce & online marketplaces	Going to market	Bringing private chefs directly to people - Your Event. Your Chef. Your Foodiac.	Foodiac is an online marketplace that will revolutionise restaurant industry by bringing private chef to your events, for both consumers and businesses. Further, Foodiac is a modern tool and concept for chefs to manage their business, leaving time for their core-talent - cooking.	CEO: Miikka Mäkiö (Background in e-commerce solutions sales), CTO: Jouni Mustalahti (Bg: IT consulting), Lead developer: Dexter Ogie-osahon (Bg: full-stack developer), Finance: Otso Kallonen (Bg: Financial Auditing), Finance/HR: Juho Lassila (Bg: Controller), Marketing: Juho Äikäs (Bg: marketing)	Foodiac.fi is a marketplace platform with emphasis on tools and automation; we offer tools for chefs from receiving RFQs, up until payment (and accounting) so that they can focus better on cooking. Customers can manage their orders and discuss directly with the chefs in our RFQ chat.	Our markets are the restaurant market (casual & fine-dining $220b), b2b event catering market ($36b) and home-catering market ($33b). Business model based on a commission.	We have few competitors; one in France and two in the US. Our two differentiators from our competition: 1. Focus also on B2B, not only home-dinners 2. Comprehensive set of tools for our chefs - chef commitment to our tools and possibility for additional service (e.g. accounting) sales.	MVP launched in January 2015. In Finland around 50k€ of incoming inquiries per month. Launched in Dubai, UAE mid-October 2015 - 50k€ of incoming inquiries per month Launching 3rd market at the end of 2015. Sales 200k€ in Finland for 2015, 100k€ for Dubai in 2015.	Finland: 150k€ incoming RFQs per month, Dubai: 150k€ incoming RFQs per month UK: Birmingham 150k€ RFQs per month UK: Other 100k€ RFQs per month, 10k€ commission per month UAE: 150k€ RFQs per month, 15k€ commission per month	Yes	Yes	No	No	No	Yes	No	Yes	No	No	No	No	No	No	No	No	No	No	No	No	No	No	Yes	No	No	No	No	Yes	No	No	No	No	No	No
Deveteam Oy	Early Stage	http://stages.deveteam.com	Finland	Oulu	2015	E-commerce & online marketplaces	Going to market	Revolutionary bricks to clicks solution for offline stores	Deveteam is developing products for realtime communication. Our main product Deveteam Stages provides unique solution for offline stores how to combine online and offline sales(bricks to clicks). The potential market globally for Stages is huge as it can be used almost any offline store.	Erkki Lohiniva, CEO Over 25 years career as leading B2B software product and solutions development and sales. Pentti Timonen, Chairman Long and successful career as software business director and entrepreneur. Strong hands-on competence in startup and mature business strategies.	Devteam Stages is a bricks to clicks solution providing extremely easy way to sell products to online users with the help of offline store products. Online customer can see and buy products from the offline store with the help of browser based live video.	Retail globally	E-commerce platforms, however not providing exactly similar solution	During 2015 the first version of the product has been developed. Sales operations have been started in Finland and in Germany.	Our strategy is to invest on the following key areas - Sales and marketing - Choose the main market areas (EMEA, US, ?) and invest on entering the market - Invest on growing the team, including management, boards, sales and R&D - Develop product further - Develop product further	No	Yes	No	No	No	Yes	No	No	No	No	No	No	No	No	No	No	No	No	No	No	No	No	Yes	No	No	No	No	No	No	No	No	No	No	No
Streamr	Early Stage	http://www.streamr.com	Finland	Helsinki	2015	Industrial internet & IoT Analytics, big data & AI	Going to market	Application enablement platform (AEP) for realtime IoT	The world is increasingly loaded with streaming data sources (IoT devices, websites and apps, social media, stock & cryptocurrency markets, credit card transactions, etc.). How to bring these together and enable easy refinement, automatic reaction, and development of added-value applications?	Nikke Nylund, CEO, serial entrepreneur (Quartal, Sujuwa) Henri Pihkala, CTO, background in algorithmic trading -related tech (Hedgehog, Unifina)	The Streamr platform enables users (often developers or domain experts) to quickly create visualizations and logic on top of streaming data, and use the results in flexible ways. They might build dashboards for their clients, or power external websites and applications with realtime data.	Companies across industries dealing with IoT or other sources of realtime event streams. Our pilot cases range from manufacturing to finance and entertainment. Available tools for realtime analytics and automation are far from established. Targeting the realtime subspace of the grand IoT market.	- Open-source frameworks like Storm - need a lot of infrastructure and development effort from scratch to get to where you are with Streamr in a few clicks. - Big players like IBM and Tibco - expensive and slow to start using, not agile and lightweight like Streamr.	During 2015, we have achieved a working MVP and done some pilot customer cases with it, proving traction and starting initial cash flow while bringing lessons learned into product development. Looking at USD 50k-100k revenue for 2015. First hires. TEKES support.	More customer cases are in the pipeline for Q3/2015, and R&D efforts aim for global product launch in Q4/2015 or Q1/2016. Bring in funding to accelerate growth, team expansion in both tech and business, focus on sales and marketing efforts. Establish partnerships with key development houses.	Yes	No	No	No	Yes	No	No	No	No	No	No	No	Yes	No	Yes	Yes	No	No	No	No	No	No	No	No	No	No	No	No	No	No	Yes	No	No	No
Funimate	Early Stage	http://www.funimate.com	Turkey	Istanbul	2015	Mobile Social media	Going to market	Best video editor app with a community of passionate users making awesome videos	Funimate is a video editor for iOS, downloaded 1.5M times allows young creators to make awesome vides very quickly using never before seen effects. Funimate is launching its social platform and will be the place for creatives to showcase their talent and a platform to watch cool &creative videos.	Founders are PhDs in mobile imaging, worked earlier at Nokia and Imagination and are experts on mobile imaging and video processing, and led teams building products and technologies now used by millions of people. Creative director earlier founded her design studio and advised many clients.	At its core, Funimate is a video editor with innovative features and never before-seen effects.Effects are extremely well engineered and fine-tuned to make Funimate run very snappy. Software was architected to enable some UX paradigms first time ever, such as live previewing of video effects.	Having a social platform around creative visual content creation is a large and dynamic market. PicsArt, a photo editing app with dynamic community, recently raised $15M with a rumoured valuation of $250M. There is no winner around creative mobile video editing, hence there is a big opportunity.	There are multiple well known apps/communities around creative photo editing, such as PicsArt and PicCollage, but not a clear winner around creative video editing space. Video is very hard on mobile, experience of the founders make Funimate the best positioned app for owning this space.	Funimate reached 1.5M downloads and is currently a Top-50 app in US Photo&Video category. Since September 2014, our MAU is growing 18% month-over-month and currently more than 300,000. Funimate is now in Top-20 in Top-Grossing US Photo&Video category and its revenue is growing 45% month-over-month.	We will be launching our social platform in September. Afterwards we are planning to increase our registered users and aim to increase their engagement in our platform. We will be measuring key metrics around the engagement, such as number of videos posted/viewed, number of like&comments performed.	No	Yes	No	No	No	No	No	Yes	No	No	No	No	Yes	Yes	No	No	No	No	No	No	No	No	No	No	No	No	No	No	No	No	No	No	No	Yes
Forecast.it A/S	Early Stage	http://forecast.it	Denmark	Copenhagen	2013	Analytics, big data & AI Enterprise software	Going to market	Intelligent project insights for better business decisions with Forecast.it PPM	_x0007_Forecast.it provides intelligent project insights for better business decisions. _x0007_We help management and project managers gain transparency and understand how their digital projects perform. _x0007_We do this by connecting to your existing apps and giving vital visual feedback that is easy to understand.	Dennis Kayser - CEO | dk.linkedin.com/in/denniskayser/ Danny Larsen - CTO | dk.linkedin.com/in/dannylarsen Niels Frederiksen - Front-end Technology | dk.linkedin.com/in/nielsgfrederiksen Jens Pallesen - Back-end Technology | dk.linkedin.com/in/jensduelundpallesen	Forecast.it is for startups and enterprises who wish to get predictability into their budgets and projects. It is for companies who want the full portfolio and resource overview and organizations that want to get their distributed teams of any size more organized and productive.	$4 billion market with 12% annual growth geared towards SaaS	There are several players in the market but they all fall into 3 categories: 1: Specialized for planning, difficult to use and expensive to implement 2: Complex to implement, not well integrated and expensive 3: Not intelligent, heavy manual work required and error-prone See deck for details.	We have been focused on building the product. Now we're at a stage where we're gaining traction and onboarding more customers. We have had paying customers since the company was founded.	Our strategy is to massively increase our customer base as well as executing on our product & integration roadmap. To do this we need to ramp up our inside sales, customer success and marketing skills, which we're already in the process of doing. Our first investment round will help execute this.	Yes	No	No	No	Yes	No	No	No	Yes	No	No	No	Yes	No	No	Yes	No	No	No	No	No	No	No	No	No	Yes	No	No	No	No	No	No	No	No
BizChatBox	Early Stage	http://www.bizchatbox.com/	Sweden	Stockholm	2015	E-commerce & online marketplaces	Going to market	BizChatBox is a easy to use CRM platform for small to medium size businesses.	BizChatBox is a CRM platform catered towards SMEs. Businesses can set up customer support, capture feedback and gain business insights using powerful tools that are easy to integrate and can be set up in mere minutes. We launched in May 2015 and BizChatBox has gained over 2500 users in 5 Months	Dennis Surendra (Founder) - 15 Years in Experience in developing software. Mayan Narendran (Co Founder) - Experienced Business Analyst. Bhavin Patolia (Software Developer) - Experince in CRM platforms. Talha Qamar (Mobile Developer). Partha Chakboti (Software Developer) in Communication Platforms	Our Product comprise of three parts Provide Customer Support, Collect Feedback and analyst user and customer behavior to improve marketing strategies. We have launched some features already and we will launch rest of features in coming months.	So we are in Customer Relationship Management (CRM) space which is a 36 Billion dollar market by 2017 as per Gartner. We are looking at global market which is huge and it’s growing really fast.	UserVoice lacks in Chat support and visitor behavior analysis. FreshDesk is a HelpDesk solution not focusing on product development or visitor behaviors. ZenDesk and SafesForce are big players who are rich in features but these products are expensive and not really focusing on small companies.	BizChatBox launched the website with basic features in May 2015 we got 200 users. From then till now we have had over 2500 users within 5 months without a single paid advertisement. Our Users are online businesses who use our CRM tools in their business process.	We are expecting our user base to grow as we introduce new features. Once our product is matures in terms of features are released we can introduce a subscription revenue model for our users. Next 6 Months - 10000 UsersNext 12 Months - 30000 UsersNext 18 Month - Over 50000 Users	Yes	Yes	No	No	No	Yes	No	No	Yes	No	No	No	No	No	No	No	No	No	No	No	No	No	Yes	No	No	No	No	No	No	No	No	No	No	No
PlayWin	Early Stage	http://www.playwin.me	Estonia	Tallinn	2015	Gaming Mobile	Going to market	PlayWin enables friends to play mobile skill games with each other for money.	The PlayWin platform allows mobile developers to integrate directly into their existing games. Players can immediately begin challenging their friends and win real money.	Garrett Weinzierl - Founder - Developed a variety of models and tools while running a sports betting group Margus Kerma - Technical Advisor - ex-Skyper/ZeroTurnaround team lead	PlayWin allows casual and competitive gamers to play against people they know for real money in their favorite mobile games.	PlayWin allows casual and competitive gamers to play against people they know for real money.	Cashplay and Skillz currently have developed pseudo multiplayer environments for mobile enabling gamers to play against unknown people. PlayWin is the first to provide an actual multiplayer experience allowing people to choose who they play against.	At the time of application we are pre-launch finishing up closed beta.	We intend to aggressively begin marketing and developer integrations in earnest. Finding product/market fit and identifying profitable user acquisition channels are the next step.	Yes	Yes	No	No	No	No	No	No	No	Yes	No	No	No	No	No	No	No	No	No	No	No	No	No	No	No	No	No	No	Yes	No	No	No	No	Yes
Midverse Studios	Normal	http://www.midversestudios.com	United States	Mountain View	2012	Gaming Music & entertainment	Going to market	We make mobile games based on popular sci fi/horror/fantasy Hollywood IP	Midverse works with Hollywood partners (movies studios, TV Networks, IP owners) to create engaging games abased upon popular fan properties. Our first game is based on Showtime's hit TV show, Penny Dreadful. We have other IPs licensed, and do both 1st party and 3rd party development.	Rizwan Virk - co founder of Gameview Studios (makers of Tap Fish), sold to DeNA, fouding team at Tapjoy, angel investor/advisor in Funzio, angel investor in Telltale	We make a collectible card game (CCG) and puzzle RPG engine that can be customized for different hollywod IPs. The first game is Penny Dreadful: Demimonde, which is based on Showtime's horror series, Penny Dreadful.	The market for mobile gaming is growing to $30B. Midcore / hardcore mobile games are among the top grossing. Working with Hollywood IPs will let us get users for significantly less cost than our competitors.	Zynga, Glu, and other mobile game developers	We licensed our first two IPs in the past 12 months, Penny Dreadful from Showtime and another leading TV show from NBC/ Universal. We also built our CCG engine which will be used to release multiple games.	We will release at least 4 hollywood IP games, each of which we expect to do ~$5 million and $10 million in revenue.	No	Yes	No	No	No	No	No	No	No	Yes	No	No	No	No	No	No	No	No	No	No	No	No	No	No	No	No	No	No	Yes	No	No	No	No	No
Finnay OY	Normal	http://www.finnay.com	Finland	Helsinki	2015	Mobile E-commerce & online marketplaces	Going to market	Finnay is the best sustainable gift service. Available globally soon.	Finnay provides completely new fun, easy way to give & receive gifts in a sustainable way. The model is scalable & low cost. Give a gift instantly from USA to Australia without shipping. Using local partners we can combine offline & online shopping.	Riikka Lindström CEO, Timo Kaleva CTO, COO Heikki Myllyoja. In house team: Veera Saarelainen, Gilles Traditi, Heidi Kumpulainen, Inna Krushtal, Jhonatan Guillermo. Advisors: Maria Sipilä, Filippo Bonsanti, Anne Berner, Aija Bärlund, Oisin Lunny and Pietari Grohn.	With our app the gift giver does not have to worry about shipping & wrapping.This is an exciting & ecological way to invite the gift receiver to live an emotional adventure using the mobile app. Local Home & Hotel Delivery is simple & easy way to give a gift ecologically and ethically.	Finnay’s consumer customers are people that are busy but want to give unforgettable gifts. The global luxury gift market is worth 200B$ with 8% annual growth. Finnay is looking for a market share of that in affordable luxury products.	Direct competitors are other gift apps. No gift app currently provides a complete solution like Finnay, with gamified features or experiences and wrapped gifts. Finnay is selling best price bundled gifts combining the products from different shops.	Finnay increased the collaboration with the corner shops to 65 shops and we expanded in Berlin, Frankfurt, London & Tallinn. Finnay piloting hotel service with hotel Klaus K, GLO Hotel Kluuvi in Helsinki, as well as Das Stue Hotel and the Berlin. Wayfinder is being improved currently.	Finnay is focusing on to expand its business to Stockholm & San Francisco. Finnay has started customer research and market entry planning for the targeted markets in 2015. CEO Riikka Lindström will be running the project full time & looking for EUR 1 Million to fund its global expansion.	Yes	Yes	No	No	No	Yes	No	No	No	No	No	Yes	No	No	Yes	No	No	No	No	No	No	No	Yes	No	No	No	No	No	No	No	No	No	No	Yes
Nordic Hug	Early Stage	http://nordichug.com	Finland	Helsinki	2013	Health & wellbeing	Going to market	The first professional disinfectants specifically developed for touch screens	Multiple-patents-pending natural based formula and world class certifications in accordance with strict Boeing and Airbus requirements. The only company on the market which can safely and effectively disinfect touch screens in professional setting: Healthcare, Aerospace, Education.	PhDs in Biochemistry, Colloid and Surface Chemistry, ex investment banker, Ex. head of sales of GE Healthcare Nordics. Advisory board of 4 PhDs.	Formula is unique on the market and the only one that passed strict certifications and can be used in Aerospace, Hospitals and Education setting to disinfect effectively modern touch screens without damaging them. (alcohol based products are not suitable for touch screens)	Focus on B2B due to our clear advantage of the unique formula and certifications. Big prog	There is no other alcohol free formula which is at the same time a strong disinfectant on the market. Challenge is to create a formula which is non alcohol, strong disinfectant and leaves no residue on the screen. Moreover we are the first and only to be certified by Boeing and Airbus.	Flagship Finnish airline as client, partnership with Samsung Smart Classroom Finland, expanding distribution to Denmark and Italy.	Product line launched, focusing on B2B in Education, Healthcare and Aerospace. We will focus further once we select the most promising direction within the segments.	Yes	No	No	Yes	No	No	Yes	No	No	No	Yes	No	No	No	No	No	No	No	No	No	No	No	No	No	No	No	No	No	No	Yes	No	No	No	No
Technoautomat Research & Development Centre	Early Stage	http://www.technoautomat.net	Russian Federation	Engels	2013	Energy Manufacturing tech & materials	Going to market	Research, development and products’ manufacturing for all industrial application	Technoautomat is developing new products and services based on its own technologies and research with a focus on customers’ needs. Our innovations are generated in own laboratories by an experienced and awarded team of professionals. Company became a resident of the Skolkovo innovations fund in 2013	Oleg Kachanov (managing director), Viacheslav Tokarev (CTO), Anton Kurenkov (Chief Designer), Andrei Romanov (Chief process engineer), Dmitri Aristov (Project manager, Director of Development), Lidia Tuulas (COO, Europe), Antti Eskelinen (CTO, Europe).	Taking into account customers’ needs, we are designing products based upon our own research and unique technology.Our ultrasonic level recorder Rubin-1M helps industrial tank level control without disturbing the main technology process.It is very accurate, but at the same time smart an simple to use	Level recorders market globally: 2,8 M units – 3 058 MUSD (2014). Market growing 7,5 % /year. Non-invasive devices: 30% of all devices (2015) with forecast to growing up to 60 % by 2020. Main application industries: oil & gas, chemistry, pharmaceutical, food industries.	Our patented technology gives us excellent advantages over our competitors. Main advantages: non-invasive, simple to install, tank interior configurations do not affect installation of the sensor in any form (flat, spherical, etc.) on the tank, reliable and accurate measuring, self-diagnostic.	Our company has expanded into the European market by establishing a subsidiary in Finland. The first prospects and partners have been found. At the same time, our development department has launched new innovative products, which have been successfully tested and approved by customers.	Expansion of our European market will continue by searching for new customers and partners. Also a dialog with Skolkovo and Tekes about new device development will continue. Ready-to-sale devices will move to the next stage and new devices' development will continue.	Yes	No	No	Yes	No	No	No	No	Yes	No	No	No	Yes	No	No	No	No	No	No	No	No	No	No	No	Yes	No	No	No	No	No	No	Yes	No	No
Usability Test	Early Stage	http://usabilitytest.fi	Portugal	Maia	2015	Analytics, big data & AI	Going to market	Usability testing of websites, based on real users and screen videos	Our usability tests reports and condensed highlight videos help website owners understand, why visitors leave and why some of them buy. Our test users visit your site and the usability will be analyzed from their screen videos and spoken feedback.	Founder Roope Koski: web art shop-keeper 1997-2004, usability enthusiast since early 90's.	Our test users perform defined tasks on their PC's and mobile devices, "thinking aloud" at the same time. Their screen videos, spoken feedback and written answers are uploaded to UT server either for the developers to see directly, or as a basis for our usability reports and short highlight videos.	Most websites worth more than one k€ would potentially benefit from our services, since most sites have clear usability problems which harm conversion. At the moment operating in Finland only. Plans to expand to other non-English speaking countries.	The only provider of usability testing in Finland in this price range and technology. Competing against lab-based usability testing, A/B testing, Hotjar and statistical web tools plus Fivesecondtest.com, and mainly against sheer ignorance and pride. Our product is similar to Usertesting.com.	Finally earning more than we spend.	After a couple of pivots we have found the right channels for our product in Finland. Our goal is to strengthen our co-operation with our re-sellers, and after the concept has been fine-tuned, expand to other countries.	Yes	No	No	No	No	Yes	Yes	No	No	Yes	No	No	No	No	No	Yes	No	No	No	No	No	No	No	No	No	No	No	No	No	No	No	No	No	No
MeetnGreetMe	Early Stage	http://www.meetngreetme.com	Belarus	Minsk	2015	E-commerce & online marketplaces	Going to market	Personal concierge services for business and leisure travelers from locals.	MeetnGreetMe is founded to support the success of business and leisure travelers through local personal assistants worldwide. Blending our online social platform with offline localized concierge services, MeetnGreetMe aims to complement the travel and hospitality industry around the world.	Our team consists of 7 people: 3 cofounders with skills in strategy, business dev, product&project management, IT and UX; 3 members who pursue SMM, UX and IT; a mentor who is a "big" social media guy in Belarus. CEO: 8+ years in international retail banking, MBA; CTO: 7+ in IT dev; CDO: 7+in UX	We bring luxury of concierge services to masses by inviting local people to become personal assistants for business and leisure travelers. We change the existing concept of concierge service by making it easily available and and fill it with fun and friendship.	MeetnGreetMe aims to complement tourism and hospitality business. The size of world travel market by the end of 2015 is forecasted to reach $1,3 trillion with more than 3 mln people crossing the international boards every day. $2 bln is the size of global concierge market by the end of 2016.	Concierge companies are expensive, usually for affluent customers. American Express is for cards owners. Vayable focuses on tours, mostly for leisure travelers, not a social network, no opportunity to choose a personal assistant. Tour guides offer limited services with focus on city guiding.	Number of registered meetngreeters, number of service requests. People got an opportunity to sign up in April 2015. Our first marketing campaign was on August, 21st on Product Hunt. The last month growth is 1 043% and 1 050% correspondently (Product Hunt was awesome).	Now we are establishing legal entity, so we will focus on signed up meetngreeters and transactions (not just requests). We will 'win' city by city, promoting our service via SMM and offline partnerships as well as encourage co-creation with existing MeetnGreetMe community.	No	Yes	No	No	No	Yes	No	Yes	No	No	No	Yes	No	No	No	No	No	No	No	No	No	No	Yes	No	No	No	No	No	No	No	No	No	No	No
StoryBy	Early Stage	http://www.storyby.com	Finland	Espoo	2015	Social media	Going to market	Storyby is a topic driven microblogging service that pays its contributors.	Storyby is a topic driven microblogging service that pays its contributors. StoryBy believes that users’ content is valuable, thus writers should get paid for what they do today for free. The idea is simple; the blogs are topic specific and conversational. The content is compact and visually rich.	Janne Jormalainen, Founder & CEO: Global executive roles at Nokia. Recently did successful exit from SPU. Serial entrepreneur and investor; Juha Lehtomäki, Co-Founder & CTO:Global broad SW engineering and organizations experience; Pia Jormalainen, Co-Founder & CMO:Broad global marketing experience	StoryBy wants to help people share their experiences by making blogging topic-specific, compact, conversational and profitable. StoryBy believes that writers should get paid for what they do today for free. StoryBy pays back 2/3 of revenues to the contributors.	We are targeting global markets, first launching in the US followed by UK and rest of Europe. The market opportunity is all internet users that use social media services.	Tumblr and Medium are main competitors. Still, there are none that would be a direct one with its earning logic or topic driven approach. There is a market gap for a visually rich, topic-specific and conversational microblogging app. Rewarding users for their content is a novel feature.	Key metrics: 1)registered users, 2) unique visitors, 3) ad revenue. We are launching our full service on 15 October and starting customer acquisition. We've run as beta since end 2014 with app 10000 unique visitors.	By the end of 2015 100 t registered users and 470 t unique visitors have been acquired; 16.5 t$ revenue. By the end of 2016: 4.7 M registered users, 22.5 M unique visitors, 1.9 M$ revenue. Goals reached through massive user acquisition campaigns. First business pilot in the US starts 15 Oct 2015.	No	Yes	No	No	No	No	No	No	No	No	No	No	No	No	No	No	No	No	No	No	No	No	No	No	No	No	No	No	No	No	No	No	No	No
BitCalm	Early Stage	http://bitcalm.com	Russian Federation	Moscow	2014	Enterprise software Cyber security	Going to market	BitCalm is server backup software as a service.	BitCalm helps SMBs that have data and don't have sysadmin configure backup easily by 55 seconds. BitCalm allows non-experts to configure backups for their servers. In the basis of the service there is the principle of a fully automated backup configuration	- Eugene Morozov (CEO, CTO) – 5 years of experience in development of high load software and development management. - Boris Dus (Sales, Business development) – 4 years in b2b sales and marketing - Yury Andreykovich (Product management & Analytics) – 7 years in product management and design.	Our service is based on the multimodule agent software that our users install on their servers. BitCalm web interface allows users to manage backup settings and monitor backup logs and statistics.	SMB servers backup market (Medium and small internet companies, web development, Freelancers, online stores, online services) - $630m Cloud backup world market – $3.2b	The Backup Run is a reseller of R1SoftStorage company’s product. They do not have their own technological solution. Bit?an is a startup. They technological also have difficulties, since they make backups via their own servers which might lead to problems with scalability.	Our growth is x2 every month. We are testing and analyzing different traffic channels: social networks, advertising in google and bing, publications on specialized technical resources, startups catalogues as well as partnerships with technical conferences and other events.	We want to raise investments in the amount of $200,000. Money will be spent on marketing needs, entering new markets, striking strategic partnership with specialized services and on developing our product.	Yes	Yes	No	No	Yes	No	No	No	Yes	No	No	Yes	No	No	No	No	No	No	No	No	No	Yes	No	No	No	Yes	No	No	No	No	No	No	No	No
Kibo	Early Stage	http://www.kiboapp.com	Russian Federation	Moscow	2015	Social media Cyber security	Going to market	Kibo app is made by HiderTeam - the project team in privacy/security markets	HiderTeam - the project team which develops mobile solutions in the field of information privacy and the protection of user data	Sergey Blintsov, Kirill Davydov, Mikhail Gasanov, Anna Afanasieva, Alexey Bolshakov	With Kibo keyboard you can privately chat with your friends via instant and text messages in any popular messenger. While looking just like an ordinary message for an outsider, a message sent with Kibo keyboard has a hidden part that is visible only to your and your friend.	Personal privacy and Data Security	weak	We are just going to market	We are just going to market	Yes	Yes	No	No	No	No	No	Yes	Yes	No	No	No	Yes	No	No	No	No	No	No	No	No	Yes	No	No	No	No	No	No	No	No	No	No	No	No
Scrooge	Early Stage	http://www.scrooge.cc	Finland	Helsinki	2015	Financial & payment services	Going to market	The Fair Splitting App	Splitting costs and settling debts among friends is both complex and socially awkward. Our solution is the Scrooge mobile application. After having fun with your friends, Scrooge remembers who paid, does the fair splitting and even reminds you to pay back the money you owe.	Co-founders Janne, Samu and Taneli have skills in business, concept design and digital services. Janne has a vast experience as an AD & Copywriter. Samu has 14 years of experience in the ICT in management-level positions. Taneli has led over 100 digital marketing campaigns and mobile app projects.	After having fun with your friends Scrooge mobile app remembers who paid the bill, does the fair splitting and even reminds you to pay back the money you owe. Scrooge is the first fair splitting app that combines instant social connectivity, seamless collaboration and one-click peer payments.	In 2018 there will be 86 billion euros of mobile peer payments in Europe. Moreover, according to trendwatching.com Fair Splitting is No. 3 on the trend list for 2015. Our potential early-adopter Power Users will be students and young professionals who are active and typically short on money.	Our main competitor is still pen and paper. There are several peer payment apps available on the market – e.g. Facebook, Twitter, Snapchat, PayFrienz, MobilePay and Swish. We don’t consider those as competitors, more as potential partners. Direct competitors include Splitwise, Billpin among others.	Scrooge is in the pre-launch phase for mobile apps for iOS, Android and Windows Phone. After launching previous version of Windows Phone app in Feb 2015 our aim has been to gather a limited group of users for customer feedback. At the moment we have 4 000 downloads for Windows Phone app.	Scrooge has launched mobile apps for three mobile platforms (iOS/Android/Windows Phone) in Oct 2015. Our aim is to have 2 million users and revenue of 1,4 Meur by the end of 2016. Moreover stickiness over 30% and viral factor (k>1) are our most relevant KPIs for next 18 months.	No	Yes	No	No	No	Yes	No	No	No	No	No	No	No	No	No	No	No	No	No	No	No	No	No	No	No	No	Yes	No	No	No	No	No	No	No
Conexbird Oy	Early Stage	http://www.conexbird.com	Finland	Jyväskylä	2013	Transport & automotive Cleantech	Going to market	Intensify container logistic's with online container and cargo condition info	Through innovation and passion Conexbird has created and patented technology to revolutionize cargo industry’s efficiency. This will reduce shipping broken containers, prevent cargo damages, fasten handling, decrease lift counts of containers and therefore vastly mitigate the stress this industry.	Teuvo Heikkilä, CEO (the inventor). 20 years in managing device development and manufacturing (Nokia phones and Emfit healthcare devices). Kimmo Laakkonen, COO 20 years of entrepreneurship and running a software company Janne Juhala, CTO is multitalent in electronics, cloud and software development	Automated container check is the perfect way to prevent damages, help operators, insurance companies, container and cargo owners, freight forwarders and depots to be more efficiency and save amount of money. The devices based on vibration technology are included. Customers pay of the results.	Annually shipping containers make 150 Million trips and are handled 500 Million times in ports and as many times in inland operations. We want to collect condition data of every handling time and sell it several times in the form that help our end customers.	OCR and laser techniques are used to inspect empty containers. Unfortunately these can't see the frames or floor. Cargo is inspected with x-ray's and followed by devices installed in containers and are expensive. Our cloud has interface to co-operate with competitors to complement the followup data	Prototype test use during the winter 2014-2015. First product in commercial use of a depot in 8/2015. First agreement with a port operator to install the system to the cranes in 8/2015.	We are partnering with port operators and depots to produce and sell the inspection data. The estimated revenue is 4 Million€.	Yes	No	No	Yes	Yes	No	No	No	No	No	No	No	Yes	No	No	No	No	No	Yes	No	No	No	No	No	No	No	No	No	No	No	No	No	No	No
grand cru	Normal	http://grandcrugames.com	Finland	Helsinki	2011	Mobile Gaming	Going to market	Free to play mobile games	Free to play mobile games	markus pasula, mikko wilkman, celine pasula	free to play mobile games	global	lot of competition	past 12 months we have been developing 4 new games	all the 4 games will go to soft launch during next 18n months	No	Yes	No	No	No	No	No	No	No	Yes	No	No	No	No	No	No	No	No	No	No	No	No	No	No	No	No	No	No	Yes	No	No	No	No	Yes
AdasWorks	Normal	http://adasworks.com	Hungary	Budapest	2015	Transport & automotive Enterprise software	Going to market	AdasWorks develops artificial intelligence for self driving cars	ADASWorks focuses on automotive computer vision, artificial intelligence and navigation technologies. The startup’s aim is to revolutionise the automotive industry by developing cost-effective Advanced Driver Assistance Systems (ADAS) software for next-generation application processors.	Laszlo Kishonti (CEO) launched his first company - Kishonti Ltd - 10 years ago, which become a global leader in chip testing and optimisation, working with NASDAQ 100 technology companies. After starting automotive-related research teams in the past 5 years, he founded AdasWorks in 2015.	Sensor fusion based artificial intelligence software for self-driving cars. Runs on off-the-shelf, inexpensive embedded application processors and integrates all ADAS related functionality in a single control unit. More intelligence and lower cost than current distributed, proprietary systems.	Driver assistance (ADAS) and artificial intelligence for self-driving cars are the fastest growing market within the automotive industry. The estimated market size - including hardware - is currently around USD 8 billion, which is expected to reach USD 20 billion by 2020.	Mobileye	N/A, company was setup in July, 2015	We are already have started projects with OEMs, Tier1s and Tier2s. All of them are premium automotive companies. We expect to deliver our solutions in the next 12 months, which will establish AdasWorks as a reliable AI software vendor for the market.	Yes	No	No	No	No	No	No	No	No	No	No	No	Yes	No	No	No	No	No	No	No	No	No	No	No	No	Yes	No	No	No	No	No	No	No	No
Goodwiller Oy	Early Stage	http://www.goodwiller.fi	Finland	Oulu	2013	Health & wellbeing	Going to market	World’s first truly reliable alcohol tester for every consumer	Goodwiller creates new and innovative diagnostics products for consumer markets. Our first product is reliable and easy-to-use alcohol test for people wanting to make responsible decisions in their life. Our vision is to change people’s perception about how convenient diagnostics products can be.	Our team (Petri Särkelä, Petteri Närä, Teemu Mäkiniemi and Gitte Meriläinen) are experienced entrepreneurs & high-tech experts with previous experience in launching innovations to global markets. The team has unique combination of scientific, engineering and business development competencies.	We offer reliable, easy-to-use and disposable alcohol test for people wanting to make responsible decisions. The product is developed for large consumer market and not for trained professionals. The product includes validated patent pending innovations and is ready for launch in the coming months.	Consumer studies indicate that already in Finland 2/3 of adult population have the need for our product. In global scale the market for alcohol testers is growing to over 2 billion USD in coming years. Significant portion of that need can be fulfilled with our new and innovative product.	Compared to existing breathalyzers in the market we offer truly reliable laboratory-grade accuracy with very affordable price. By using modern manufacturing technologies we bring the functionality and usability of diagnostics tests from 80’s to this century.	We closed significant seed round during 1H/2015 that enabled us to start the next business development phase. We are working at full speed with rigorous product validation as well as to fine-tune the details of the manufacturing process, product launch and pilot sales with retail partners.	We are finalizing the product and ready to launch in Finland during coming months. By the end of 2016 we have validated the business model and achieved >1M€ sales in Finland. In addition we are also ready for international expansion to key EU markets.	No	Yes	No	No	No	No	No	No	No	No	Yes	No	Yes	Yes	No	No	No	No	No	No	No	No	No	No	No	No	No	No	No	Yes	No	No	No	No
Fiilis Experience Oy	Early Stage	http://www.fiil.is	Finland	Helsinki	2015	Communications & media Analytics, big data & AI	Going to market	Mobile platform for collecting feedback and converting it into business benefits	Fiilis is a mobile platform for collecting feedback and converting it into business benefits. We raised a pre-seed round and launched our MVP in May 2015. Our customer base (shopping centres and chains) is steadily growing and we are actively looking at opportunities to expand in Europe and Asia.	Antti Heikkilä (Founder, CEO) -5 years experience in B2B sales & management Klaus Dahlén (Co-Founder, CTO) -7 years experience in building awesome digital products Risto Hurmeranta (Co-Founder, Growth) -Rising marketing superstar with background in finance. Nordic Venture Family (Co-Founder)	Fiilis enables collecting mobilefeedback on location. Giving feedback is made simple, and the customer is immediately rewarded with a future discount. Turn negative customer experiences into positive ones to increase customer retention and drive added sales through smart coupons.	Our 3 major customer segments and initial go-to-markets are shopping centres, retail and multichannel chains and single stores. Our product is highly scaleable, and we are planning to enter the Asian market (Singapore, Philippines, Malaysia) in 2016. Opportunity globally is vast.	Traditional paper feedback forms, online feedback forms, one-way feedback tools.	Six months intensive customer development lead to several pilots. MVP launched in May 2015, since then we have acquired 5 paying customers (including Skanssi, Hansa, Aschan, and Johto Café-chain) and our current MRR is 561 € /mo.	We are looking to acquire 1000 freemium locations and 50 paying locations (break-even) by the end of Q1 2016 and start international expansion after this with a tested go-to-market strategy.	Yes	No	No	No	Yes	No	No	No	Yes	No	No	Yes	No	No	No	Yes	No	No	No	Yes	No	No	No	No	No	No	No	No	No	No	No	No	No	No
JWM Technologies Oy	Early Stage	http://www.jwmtech.com	Finland	Lahti	2015	Consumer electronics Mobile	Going to market	Wireless chargers for mobile devices based on printed electronics.	Finnish based company who develops, designs, markets and sales chargers for different kind of mobile and portable devices based on printed electronic.	Jari Nietosvuori (Marketing & co-founder) Head of the board, Will Stone (PR & co-founder) Member of the board and Marco Hautakoski (Sales & founder) Member of the board.	Worlds thinnest wireless chargers for mobile and portable devices.	Global market of wireless chargers.	Fast growing markets with multiple different players incl. big mobile device manufacturers.	Just started from 0 to few k€	Market entry + fast growth in sales, expected revenue for 2016 is 2 million €	Yes	Yes	No	No	No	No	No	No	No	No	No	No	Yes	No	No	No	No	No	No	No	Yes	No	No	No	No	No	No	No	No	No	No	No	No	Yes
Cognitive Finance Technologies LLC	Normal	http://cofite.com	Russian Federation	Saint-Petersburg	2015	Financial & payment services	Going to market	LiveTrade is a platform for trading. Blockchain-based marketplace comes true.	Cognitive Finance Technologies presents LiveTrade platform for financial services. One can build stock marketplace using LiveTrade, other bank can add new services for business. Banks, stock exchanges, brokers, investteams and users already pays us. Blockchain based version is under prototyping.	Roman Gagarsky is a founder. He has strong mathematical background as well as practic experience in trading. Our HFT strategies win "Best private investor" award on Moscow Exchange.	LiveTrade is flexible financial trading platform, oriented for HFT trading. It is enabled to be decentralized. It includes order management systems, know a lot of protocols, work with networks and dark-pools. We know a lot of “how to” with happiness of traders, with high-speed databases and etc.	Software for trading is huge market estimated by USD2 billion according to Bloomberg annual reports	Trading platforms (from Bloomberg to Ninja trader and Metatrader). Decentralized stock exchanges like Medici We have complete solution from stock exchange gate to user terminal, able to be customized. It is designed to support HFT technics and algorithm trading.	500 new users, one bank, 9 brokers and 2 acquision requests from industry.	Next blockchain version, US market and 10000 more new users.	Yes	Yes	No	No	No	Yes	No	No	Yes	No	No	No	No	Yes	No	No	No	No	No	No	No	No	No	No	No	No	Yes	No	No	No	No	No	No	No
DropDeadPaper	Early Stage	http://dropdeadpaper.com	United Kingdom	London	2015	Education Social entrepreneurship & Impact	Going to market	A free repository for scientific studies and unpublished papers.	Many scientific studies do not get published and end up forgotten or unused for various reasons(eg negative results, language/format errors etc). We believe that all scientific studies are beneficial in some way and can be useful to others and thus have created a free repository for these studies.	James Dixon - Technician/Developer. Over 6 years working in software. Developed the product from scratch.Aline Quadros - Biologist. Over 15 years working in the science/research industry. Understands the industry and the problems it currently has.	-Once users are signed up to the website, they can upload a new project,including files,datasets,university name etc-Comments section allows users to discuss the data, and why the it was not published. Also offering possible monetised proofreading service	The entire academic/research industry.	researchgate.com, figshare.com, arxiv.org,plosone.org,What separates us from the existing websites, is we focus on unpublished/rejected papers. Because of this, we do not deal with traditional publishers, therefore we make the process free for both the authors of the papers and the consumers.	Very new company, only started this year.	Very new company, only started this year.	No	Yes	No	No	No	No	Yes	No	No	No	No	No	No	No	No	No	No	No	No	No	No	No	No	Yes	No	No	No	No	No	No	No	No	No	No
Topicalio	Early Stage	http://topicalio.org	Finland	Helsinki	2015	Social entrepreneurship & Impact Communications & media	Going to market	Topicalio - a new empowering gamified media, that makes politics interesting	Topicalio is a media for the ”apps generation” to keep up with current national and local matters. It lowers the barrier of engagement with personally relevant headlines and visual gamified presentation. Our aim is to be THE app to awake interest in public topics and enable collective lobbying magic	Sami Pippuri, Olavi Toivainen, Lauri Svan, Jerome Laufer	Topicalio is a B2C media app for politics. It engages with relevant notifications and tasks, context UX (“Real-life Simcity”) and by endorsing people behind matters (LinkedIn for politics). Content is enriched from public open data and value is made via sponsored assignments and as a campaign-media	We address a global opportunity. Citizen engagement is a trend in public sector. Topicalio has a lot to offer for the city planners, politicians (the whole long tail) and companies: in construction, less appeals mean major savings. In campaigns, in US alone, the election business is a $280B market	No direct competition, but many services that call for polls and initiatives. City planning software and targeted marketing activities are also used. For local community engagement, Facebook is popular – yet although not being a “local media”, Facebook is a main marketing channel for Topicalio too	First launch happening at November and timing well with presenting at Slush Booth too (applied). Raised funding for product development in the past 6 months and pilot project funding is coming in.	Pilot projects being planned with major cities in Finland during the first half 2016. The first international market in 2nd half of 2016. Team will grow to 10 people in spring and gross margin pass the 100k mark in September. The first 18 months turnover will be ca. 500k.	No	Yes	No	No	No	No	Yes	Yes	No	No	No	Yes	No	No	No	No	No	No	No	Yes	No	No	No	No	No	No	No	No	No	No	No	No	No	No
PeerF LLC	Early Stage	http://peerf.me	Russian Federation	Moscow	2015	Mobile Communications & media	Going to market	Application for easy & fast content transfer between any devices even w\o Net	An average person uses three devices daily choosing the most convenient one based on location and task. File copying and switching content to the different screen is a headache especially w/o Internet. PeerF connects devices nearby into peering network to allow exchange your content with one click.	1. CEO -Nikolay ILYIN – (Tech Visionary & Serial Entrepreneur, top manager at NEC, Sistema/MTS Group, ARCCN) – General Management 2. CTO -Vladimir Bashev - (Software engineer, NEC) - applications and protocols development 3. CSO -Alex Smirnov - 20y in Sales & Marketing at C-level, 100+ campaigns.	1. PeerF can find & connect any devices P2P even if there is no Internet or WLAN 2. Advanced fast protocol 3. Easy & uniform user experience no matter what network, transport or content type. Sending now is just a one swipe \ drag on the screen 4. Connects P2P without depositing data to mediators	TAM - $3B smartphone users, PeerF focuses on 1. Multi-device users (up to 4 per average user by 2020) 2. Heavy - content users who needs to send that (Designers, Young moms, GoPro owners, Photographers, Publishers/Editorial staff, ads salespeople, Entrepreneurs) SOM within 6y. - 6M ($12M annually)	1. BTSync - www.getsync.com - cannot connect Mesh (device to device directly) - cannot connect directly, complex 2. Infinit.io (1.8M funded last year) - cannot do P2P no network connection 3. Xender - 25M downloads (do only proximity sending, manually connect needed)	SMM channel test (Facebook) 500 downloads. Conversion rate: 1%, CPC = $0,08 Unit economy: LTV (customer life time value) is above $0.8 with customer acquisition cost below $0,2 Business model: Freemium with Pro version Later stage: Business version and Selling paid content	To segment target audience more precisely. To promote application among focus social and business groups (exhibitions, meetups, speakers, etc.) To find the content partners to get more interest to the app and increase viral effect (recommendation to friends) SMM, Ads, Context Search, Reviews, PR	No	Yes	No	No	No	No	No	No	Yes	No	No	No	Yes	Yes	No	No	No	No	No	Yes	No	No	No	No	No	No	No	No	No	No	No	No	No	Yes
[truncated: 1,368 more rows]
[truncated: 17 more columns]

## Sheet: Sheet5
Row Labels	Built environment	%		All	%
Afghanistan	#REF!	#REF!		1	0.000627353		Afghanistan
American Samoa	#REF!	#REF!		1	0.000627353		American Samoa
Argentina	#REF!	#REF!		6	0.00376412		Argentina
Armenia	#REF!	#REF!		1	0.000627353		Armenia
Australia	#REF!	#REF!		4	0.00250941		Australia
Austria	#REF!	#REF!		13	0.00815558		Austria
Belarus	#REF!	#REF!		7	0.00439147		Belarus
Belgium	#REF!	#REF!		20	0.0125471		Belgium
Brazil	#REF!	#REF!		9	0.00564617		Brazil
Bulgaria	#REF!	#REF!		1	0.000627353		Bulgaria
Canada	#REF!	#REF!		5	0.00313676		Canada
China	#REF!	#REF!		6	0.00376412		China
Cyprus	#REF!	#REF!		6	0.00376412		Cyprus
[truncated: 64 more rows]

## Sheet: Built environment startups
Basic Company Information									Detailed company information						Business Type			Tracks												Industries
[truncated: 1,596 more rows]
[truncated: 17 more columns]

[truncated: 2 more sheets: Only built environment startups, Analysis]
